# Supplementary material
Source: PubMed Central journal article supplement (PMC3633484)
Supplement: NIHMS449730-supplement-SI2.pdf [file NIHMS449730-supplement-SI2.pdf]

# Supporting Information S13.

Identified  
in two-step  
but not in  
one-step

METAPROTEOMICS method.

| Spectrum information |          |        |           | Identification |             |    | Peptide Conf         |                      |
|----------------------|----------|--------|-----------|----------------|-------------|----|----------------------|----------------------|
| Sample               | Fraction | Charge | Theor m/z | $\Delta$ Mass  | Sequence    | Sc | One Step Method      | Two Step Method      |
| 1                    | 2        | 2      | 437.255   | -0.0003        | EVAKEIGK    | 9  | <a href="#">12.3</a> | <a href="#">98.6</a> |
| 2                    | 6        | 2      | 468.761   | -0.0072        | MLFGELVK    | 9  | <a href="#">64.9</a> | <a href="#">98.4</a> |
| 3                    | 6        | 2      | 441.251   | 0.0007         | QSLGAHLR    | 9  | <a href="#">80.1</a> | <a href="#">98.3</a> |
| 4                    | 3        | 2      | 407.226   | -0.0001        | LNVENPK     | 9  | <a href="#">87.4</a> | <a href="#">98.1</a> |
| 5                    | 3        | 2      | 634.853   | 0.0003         | WLSLPGETRPL | 11 | <a href="#">88.1</a> | <a href="#">96.6</a> |
| 6                    | 6        | 2      | 511.751   | 0.0002         | EHFAIYKD    | 8  | <a href="#">66.1</a> | <a href="#">95.5</a> |

Protein ID
Spectra
Summary Statistics

---

**Workflow Tasks**

- Identify Proteins
- LC...
- Spot-Based (MS only)...
- Spot-Based (MS and MS/MS)...
- View
- Analysis Log...
- Result...
- Export
- Peptide Summary...
- Protein Summary...

**Spectrum List**

| Spectrum      | Time | Prec MW | Prec m/z | Prec z | Prot N | Best Sequence | Modifications | Conf | Theor MW | z |
|---------------|------|---------|----------|--------|--------|---------------|---------------|------|----------|---|
| 18.1.1.5300.1 |      | 0.0000  | 437.2555 | 0      | 1176   | EVAKEIGK      |               | 12.4 | 872.4967 | 2 |

---

**Peptide ID Hypotheses - 18.1.1.5300.1**

| Conf | Sc | Prot N | Sequence  | Modifications | Theor MW | Theor m/z | z | ΔMass   |
|------|----|--------|-----------|---------------|----------|-----------|---|---------|
| 12.4 | 9  | 1176   | EVAKEIGK  |               | 872.4967 | 437.2556  | 2 | -0.0003 |
| 12.4 | 9  |        | DIAQELGK  |               | 872.4603 | 437.2375  | 2 | 0.0361  |
| 12.4 | 9  |        | DLAKEIGK  |               | 872.4967 | 437.2556  | 2 | -0.0003 |
| 11.4 | 9  | 220    | DLAGSIIGK |               | 872.4967 | 437.2556  | 2 | -0.0003 |
| 11.4 | 8  |        | DLAQELGK  |               | 872.4603 | 437.2375  | 2 | 0.0361  |

---

**Fragmentation Evidence for Peptide**

EVAKEIGK

| Residue | b        | b+2      | y        | y+2      |
|---------|----------|----------|----------|----------|
| E       | 130.0499 | 65.5286  | 873.5040 | 437.2556 |
| V       | 229.1183 | 115.0628 | 744.4614 | 372.7343 |
| A       | 300.1554 | 150.5813 | 645.3930 | 323.2001 |
| K       | 428.2504 | 214.6288 | 574.3559 | 287.6816 |
| E       | 557.2930 | 279.1501 | 446.2609 | 223.6341 |
| I       | 670.3770 | 335.6921 | 317.2183 | 159.1128 |
| G       | 727.3985 | 364.2029 | 204.1343 | 102.5708 |
| K       | 855.4934 | 428.2504 | 147.1128 | 74.0600  |

1

| Spectrum information |          |        |           | Identification |          |    | Peptide Conf    |                 |
|----------------------|----------|--------|-----------|----------------|----------|----|-----------------|-----------------|
| Sample               | Fraction | Charge | Theor m/z | Δ Mass         | Sequence | Sc | One Step Method | Two Step Method |
| 1                    | 2        | 2      | 437.255   | -0.0003        | EVAKEIGK | 9  | 12.3            | 98.6            |

Protein ID
Spectra
Summary Statistics

**Spectrum List**

| Spectrum      | Time | Prec MW | Prec m/z | Prec z | Prot N | Best Sequence | Modifications | Conf | Theor MW | z |
|---------------|------|---------|----------|--------|--------|---------------|---------------|------|----------|---|
| 18.1.1.5300.1 |      | 0.0000  | 437.2568 | 0      | 1059   | EVAKEIGK      |               | 98.7 | 872.4967 | 2 |

**Peptide ID Hypotheses - 18.1.1.5300.1**

| Conf | Sc | Prot N | Sequence  | Modifications   | Theor MW | Theor m/z | z | ΔMass  |
|------|----|--------|-----------|-----------------|----------|-----------|---|--------|
| 98.7 | 9  | 1059   | EVAKEIGK  |                 | 872.4967 | 437.2568  | 2 | 0.0023 |
| 96.9 | 9  | 204    | DLAGSIIGK |                 | 872.4967 | 437.2568  | 2 | 0.0023 |
| <1   | 7  |        | LDAKQGIGK | Deamidated(O)@S | 872.4967 | 437.2568  | 2 | 0.0023 |
| <1   | 6  |        | EVAKADLK  |                 | 872.4967 | 437.2568  | 2 | 0.0023 |
| <1   | 6  |        | IDVSLAAGK |                 | 872.4967 | 437.2568  | 2 | 0.0023 |

**Precursor MS Region**

No Data Showing

**Fragmentation Evidence for Peptide**

EVAKEIGK

| Residue | b        | b+2      | y        | y+2      |
|---------|----------|----------|----------|----------|
| E       | 130.0499 | 65.5286  | 873.5040 | 437.2568 |
| V       | 229.1183 | 115.0628 | 744.4614 | 372.7343 |
| A       | 300.1554 | 150.5813 | 645.3939 | 323.2001 |
| K       | 428.2504 | 214.6288 | 574.3559 | 287.6816 |
| E       | 557.2930 | 279.1501 | 446.2609 | 223.6341 |
| I       | 670.3770 | 335.6921 | 317.2183 | 159.1128 |
| G       | 727.3985 | 364.2029 | 204.1343 | 102.5708 |
| K       | 855.4934 | 428.2504 | 147.1128 | 74.0600  |

1

| Spectrum information |          |        |           | Identification |          |    | Peptide Conf    |                 |
|----------------------|----------|--------|-----------|----------------|----------|----|-----------------|-----------------|
| Sample               | Fraction | Charge | Theor m/z | Δ Mass         | Sequence | Sc | One Step Method | Two Step Method |
| 1                    | 2        | 2      | 437.255   | -0.0003        | EVAKEIGK | 9  | 12.3            | 98.6            |

tgriffin\_koore004\_051211\_PIC2 #5300 RT: 42.31 AV: 1 NL: 3.16E3

T: ITMS + c NSI d Full ms2 437.26@cid35.00 [110.00-885.00]

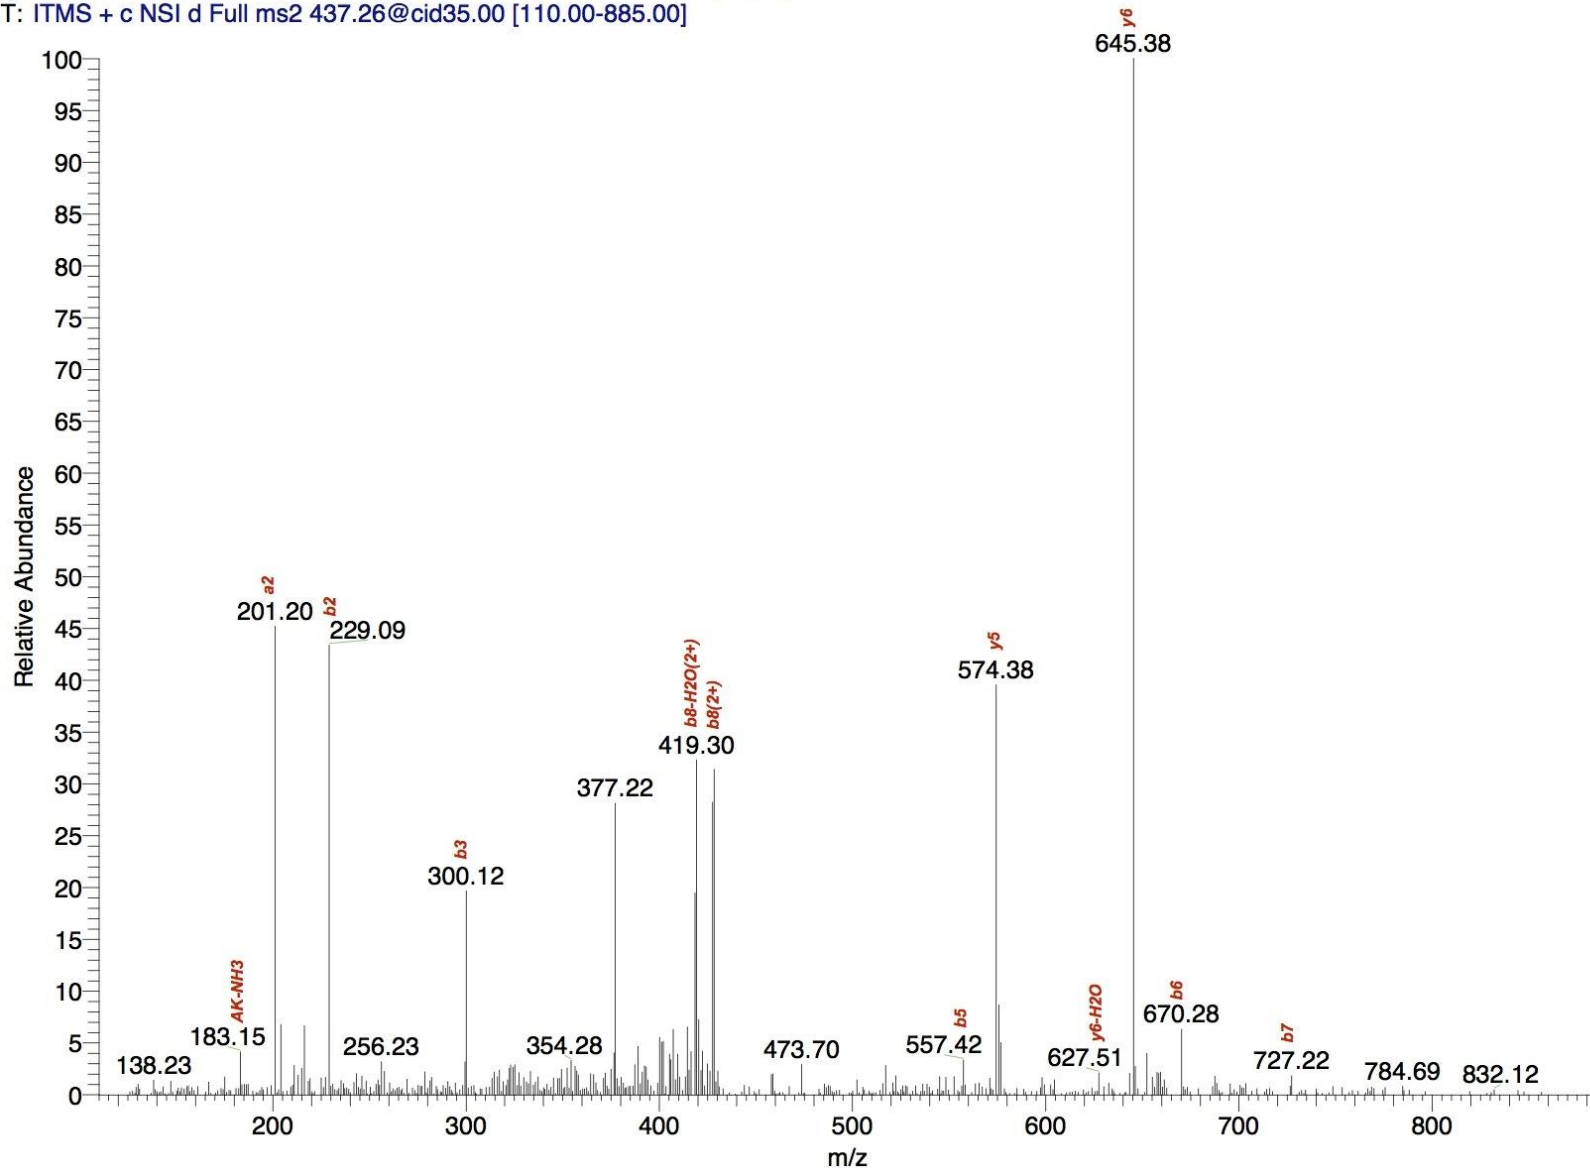

| Spectrum information |          |        |           | Identification |          |    | Peptide Conf    |                 |
|----------------------|----------|--------|-----------|----------------|----------|----|-----------------|-----------------|
| Sample               | Fraction | Charge | Theor m/z | $\Delta$ Mass  | Sequence | Sc | One Step Method | Two Step Method |
| 1                    | 2        | 2      | 437.255   | -0.0003        | EVAKEIGK | 9  | 12.3            | 98.6            |

**Workflow Tasks**

- Identify Proteins
- LC...
- Spot-Based (MS only)...
- Spot-Based (MS and MS/MS)...
- View
- Analysis Log...
- Result...
- Export
- Peptide Summary...
- Protein Summary...

| Protein ID           |      | Spectra  |          | Summary Statistics |        |               |               |      |          |   |
|----------------------|------|----------|----------|--------------------|--------|---------------|---------------|------|----------|---|
| <b>Spectrum List</b> |      |          |          |                    |        |               |               |      |          |   |
| Spectrum             | Time | Prec MW  | Prec m/z | Prec z             | Prot N | Best Sequence | Modifications | Conf | Theor MW | z |
| 41.1.1.2428.1        |      | 935.5078 | 468.7612 | 2                  | 1589   | MLFGELVK      |               | 64.9 | 935.5150 | 2 |

| Peptide ID Hypotheses - 41.1.1.2428.1 |    |        |          |               |          |           |   |         |                     |  |
|---------------------------------------|----|--------|----------|---------------|----------|-----------|---|---------|---------------------|--|
| Conf                                  | Sc | Prot N | Sequence | Modifications | Theor MW | Theor m/z | z | ΔMass   | Precursor MS Region |  |
| 64.9                                  | 9  | 1589   | MLFGELVK |               | 935.5150 | 468.7648  | 2 | -0.0072 | No Data Showing     |  |
| <1                                    | 8  | 111    | RYEEIVK  |               | 935.5076 | 468.7611  | 2 | 0.0002  |                     |  |
| <1                                    | 8  |        | AFTEEIVK |               | 935.4964 | 468.7555  | 2 | 0.0114  |                     |  |
| <1                                    | 8  |        | EYVYELVK |               | 935.4964 | 468.7555  | 2 | 0.0114  |                     |  |
| <1                                    | 8  |        | RYEELVK  |               | 935.5076 | 468.7611  | 2 | 0.0002  |                     |  |

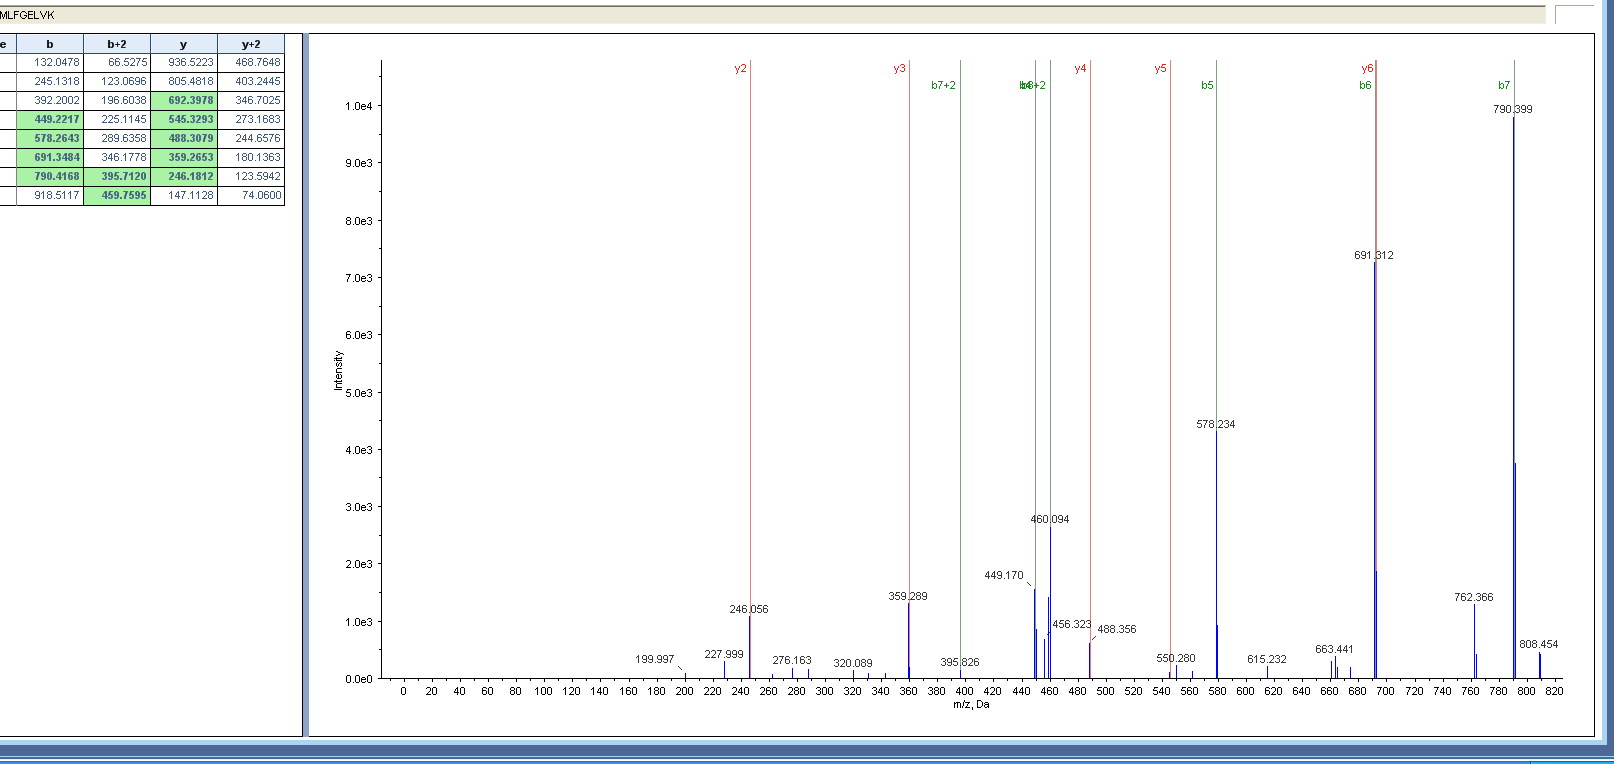

2

| Spectrum information |          |        |           | Identification |          |    | Peptide Conf    |                 |
|----------------------|----------|--------|-----------|----------------|----------|----|-----------------|-----------------|
| Sample               | Fraction | Charge | Theor m/z | Δ Mass         | Sequence | Sc | One Step Method | Two Step Method |
| 6                    | 6        | 2      | 468.761   | -0.0072        | MLFGELVK | 9  | 64.9            | 98.4            |

Protein ID
Spectra
Summary Statistics

**Spectrum List**

| Spectrum      | Time | Prec MW  | Prec m/z | Prec z | Prot N | Best Sequence | Modifications | Conf | Theor MW | z |
|---------------|------|----------|----------|--------|--------|---------------|---------------|------|----------|---|
| 41.1.1.2428.1 |      | 935.5078 | 468.7612 | 2      | 1123   | MLFGELVK      |               | 98.4 | 935.5150 | 2 |

**Peptide ID Hypotheses - 41.1.1.2428.1**

| Conf | Sc | Prot N | Sequence | Modifications | Theor MW | Theor m/z | z | ΔMass   |
|------|----|--------|----------|---------------|----------|-----------|---|---------|
| 98.4 | 9  | 1123   | MLFGELVK |               | 935.5150 | 468.7648  | 2 | -0.0072 |
| 19.1 | 8  | 88     | RYEEIVK  |               | 935.5076 | 468.7611  | 2 | 0.0002  |
| <1   | 7  |        | DHVPFLVK |               | 935.5076 | 468.7611  | 2 | 0.0002  |
| <1   | 7  |        | TAVIELAR |               | 935.5076 | 468.7611  | 2 | 0.0002  |
| <1   | 6  |        | FVETTAIR |               | 935.5076 | 468.7611  | 2 | 0.0002  |

**Precursor MS Region**

No Data Showing

**Fragmentation Evidence for Peptide**

MLFGELVK

| Residue | b        | b+2      | y        | y+2      |
|---------|----------|----------|----------|----------|
| M       | 132.0478 | 66.5275  | 936.5223 | 468.7648 |
| L       | 245.1318 | 123.0696 | 805.4818 | 403.2445 |
| F       | 392.2002 | 196.6038 | 692.3978 | 346.7025 |
| G       | 449.2217 | 225.1145 | 545.3293 | 273.1683 |
| E       | 578.2643 | 289.6358 | 488.3079 | 244.6576 |
| L       | 691.3484 | 346.1778 | 359.2653 | 180.1363 |
| V       | 790.4168 | 395.7120 | 246.1812 | 123.5942 |
| K       | 918.5117 | 459.7595 | 147.1128 | 74.0600  |

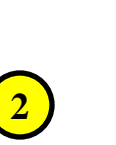

| Spectrum information |          |        |           | Identification |          |    | Peptide Conf    |                 |
|----------------------|----------|--------|-----------|----------------|----------|----|-----------------|-----------------|
| Sample               | Fraction | Charge | Theor m/z | Δ Mass         | Sequence | Sc | One Step Method | Two Step Method |
| 6                    | 6        | 2      | 468.761   | -0.0072        | MLFGELVK | 9  | 64.9            | 98.4            |

**MLFGELVK**

tgriffin\_koore004\_060611\_P6C\_6 #2428 RT: 19.84 AV: 1 NL: 9.81E3

T: ITMS+ c NSI d Full ms2 468.76@cid35.00 [115.00-950.00]

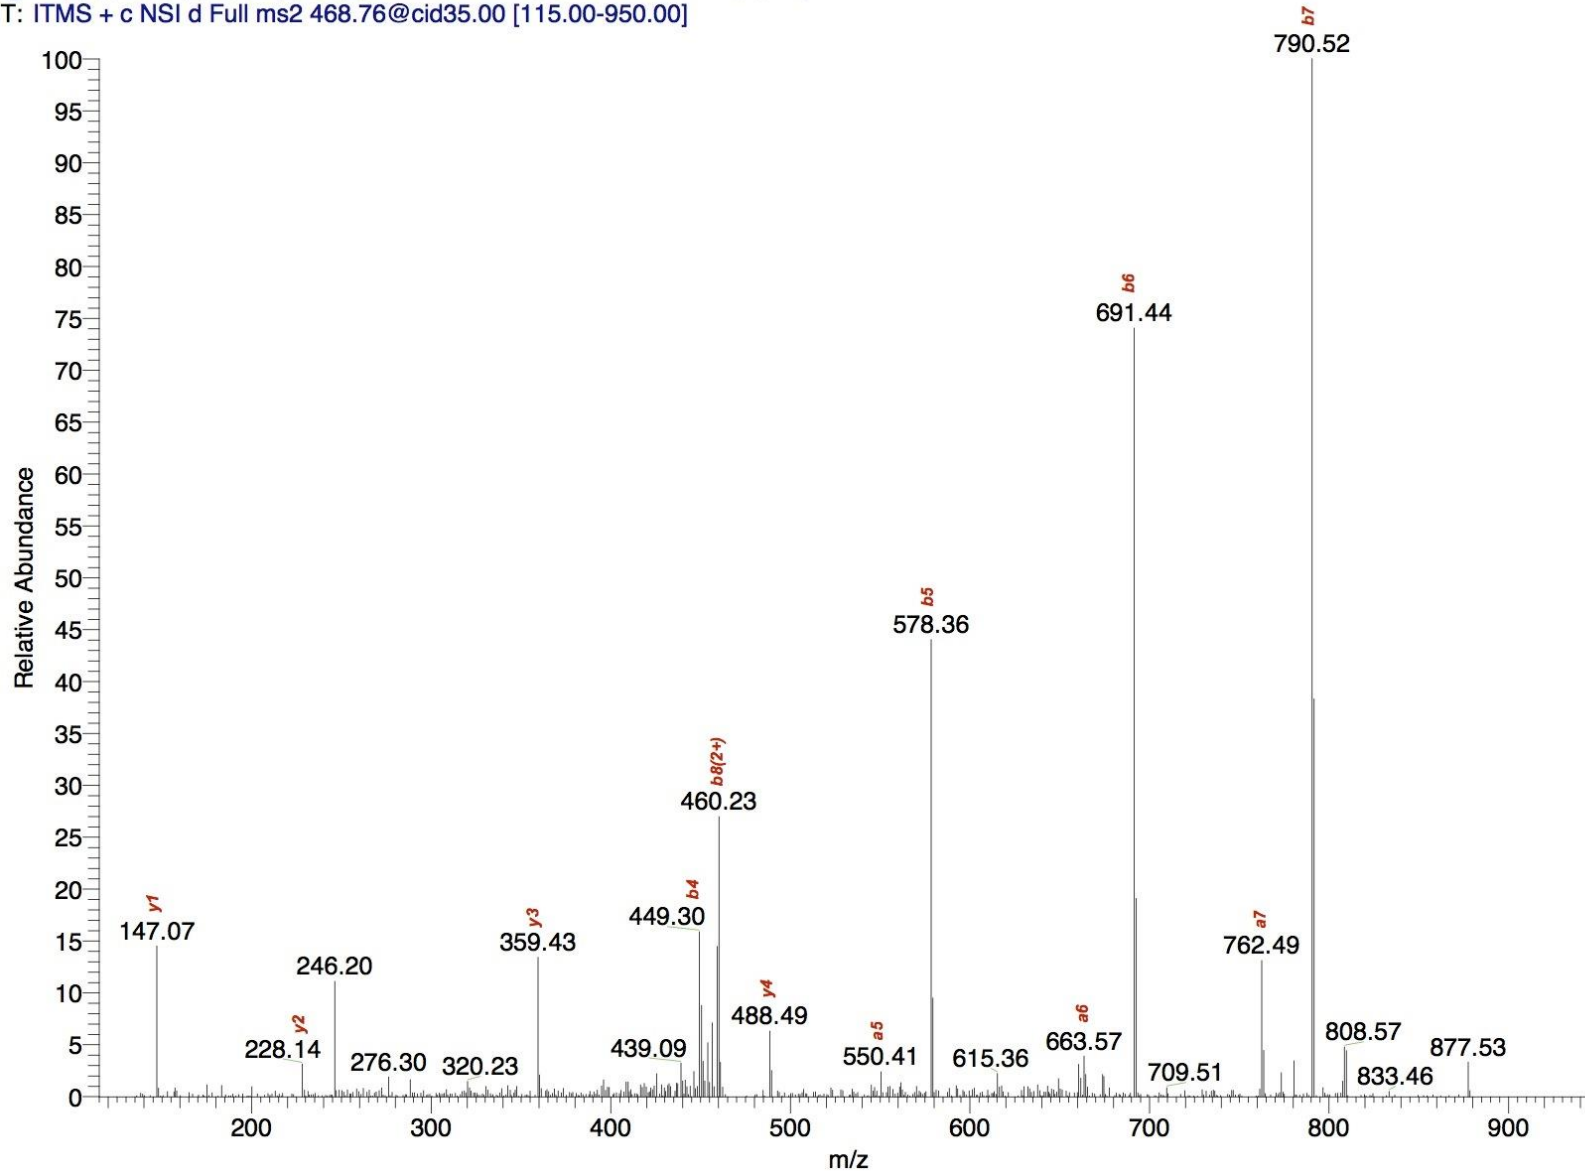

| Spectrum information |          |        |           | Identification |          |    | Peptide Conf    |                 |
|----------------------|----------|--------|-----------|----------------|----------|----|-----------------|-----------------|
| Sample               | Fraction | Charge | Theor m/z | $\Delta$ Mass  | Sequence | Sc | One Step Method | Two Step Method |
| 6                    | 6        | 2      | 468.761   | -0.0072        | MLFGELVK | 9  | 64.9            | 98.4            |

**Workflow Tasks**

- Identify Proteins
- LC...
- Spot-Based (MS only)...
- Spot-Based (MS and MS/MS)...
- View
- Analysis Log...
- Result...
- Export
- Peptide Summary...
- Protein Summary...

Protein ID | Spectra | Summary Statistics

**Spectrum List**

| Spectrum      | Time | Prec MW  | Prec m/z | Prec z | Prot N | Best Sequence | Modifications | Conf | Theor MW | z |
|---------------|------|----------|----------|--------|--------|---------------|---------------|------|----------|---|
| 41.1.1.2424.1 |      | 860.4886 | 441.2516 | 2      | 1278   | QSLGAHLR      |               | 80.1 | 880.4879 | 2 |

**Peptide ID Hypotheses - 41.1.1.2424.1**

| Conf | Sc | Prot N | Sequence | Modifications | Theor MW | Theor m/z | z | ΔMass  |
|------|----|--------|----------|---------------|----------|-----------|---|--------|
| 80.1 | 9  | 1278   | QSLGAHLR |               | 880.4879 | 441.2512  | 2 | 0.0007 |
| <1   | 8  | 452    | NTLIQLHR |               | 880.4879 | 441.2512  | 2 | 0.0007 |
| <1   | 7  |        | EKAQHILR |               | 880.4879 | 441.2512  | 2 | 0.0007 |
| <1   | 7  |        | GSLAQHLR |               | 880.4879 | 441.2512  | 2 | 0.0007 |
| <1   | 7  |        | ITICYILR |               | 880.4841 | 441.2493  | 2 | 0.0046 |

**Precursor MS Region**

No Data Showing

**Fragmentation Evidence for Peptide**

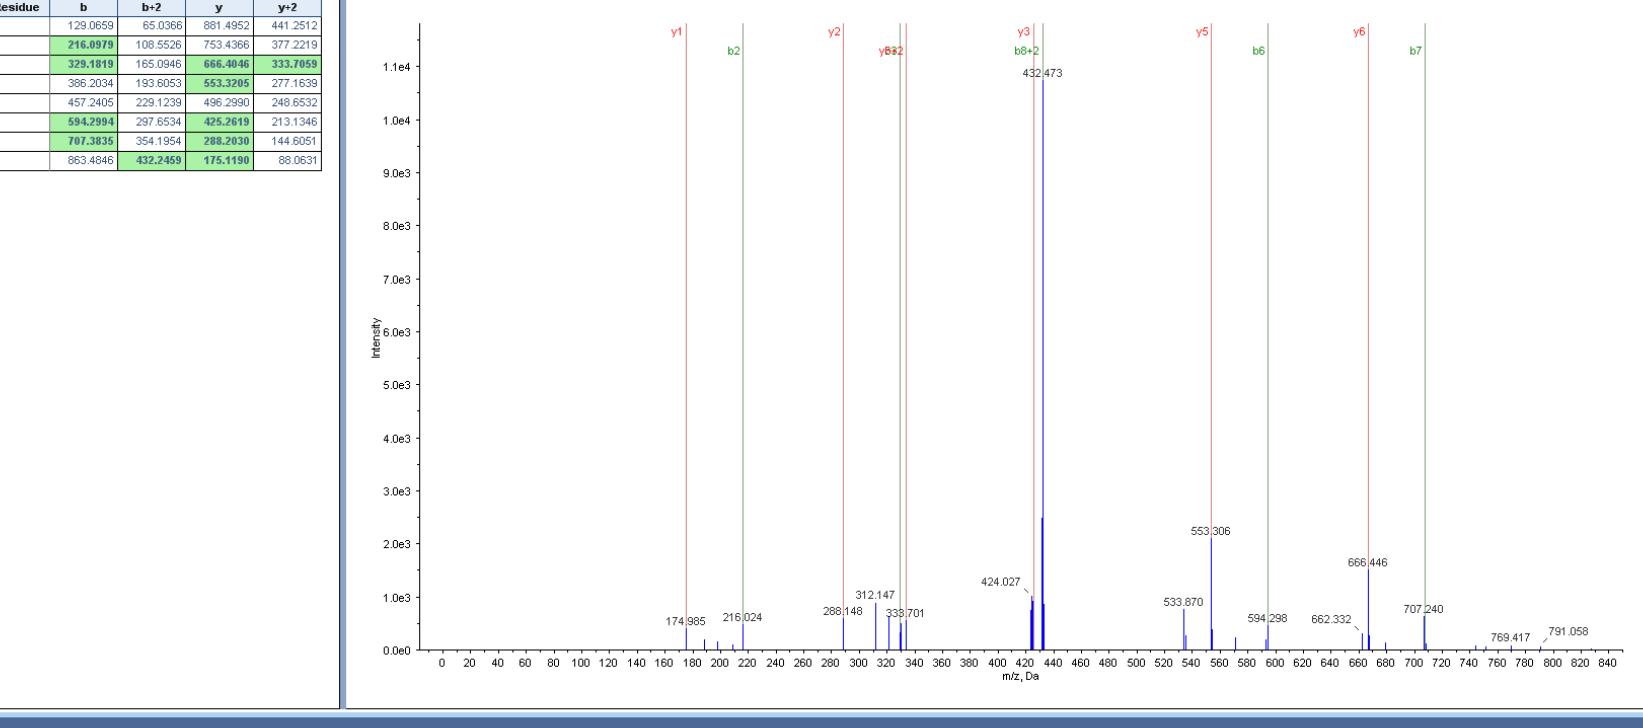

3

| Spectrum information |          |        |           | Identification |          |    | Peptide Conf    |                 |
|----------------------|----------|--------|-----------|----------------|----------|----|-----------------|-----------------|
| Sample               | Fraction | Charge | Theor m/z | Δ Mass         | Sequence | Sc | One Step Method | Two Step Method |
| 6                    | 6        | 2      | 441.251   | 0.0007         | QSLGAHLR | 9  | 80.1            | 98.3            |



Protein ID
Spectra
Summary Statistics

**Spectrum List**

| Spectrum      | Time | Prec MW  | Prec m/z | Prec z | Prot N | Best Sequence | Modifications | Conf | Theor MW | z |
|---------------|------|----------|----------|--------|--------|---------------|---------------|------|----------|---|
| 41.1.1.2424.1 |      | 880.4886 | 441.2516 | 2      | 1134   | QSLGAHLR      |               | 98.3 | 880.4879 | 2 |

**Peptide ID Hypotheses - 41.1.1.2424.1**

| Conf | Sc | Prot N | Sequence | Modifications   | Theor MW | Theor m/z | z | ΔMass  |
|------|----|--------|----------|-----------------|----------|-----------|---|--------|
| 98.3 | 9  | 1134   | QSLGAHLR |                 | 880.4879 | 441.2512  | 2 | 0.0007 |
| 17.9 | 8  | 376    | NTLQLHR  |                 | 880.4879 | 441.2512  | 2 | 0.0007 |
| <1   | 5  | 188    | FFSVYLHR |                 | 880.4807 | 441.2476  | 2 | 0.0079 |
| <1   | 8  |        | TWLQIHR  |                 | 880.4879 | 441.2512  | 2 | 0.0007 |
| <1   | 7  |        | VNNHKIR  | Deamidated(N)@2 | 880.4879 | 441.2512  | 2 | 0.0007 |

**Fragmentation Evidence for Peptide**

QSLGAHLR

| Residue | b        | b+2      | y        | y+2      |
|---------|----------|----------|----------|----------|
| Q       | 129.0659 | 65.0366  | 681.4952 | 441.2512 |
| S       | 216.0979 | 108.5526 | 753.4366 | 377.2219 |
| L       | 329.1819 | 165.0946 | 666.4046 | 333.7059 |
| G       | 386.2034 | 193.6053 | 553.3295 | 277.1639 |
| A       | 467.2405 | 229.1239 | 496.2990 | 248.6532 |
| H       | 594.2994 | 297.6534 | 425.2619 | 213.1346 |
| L       | 707.3835 | 354.1954 | 288.2030 | 144.6051 |
| R       | 863.4846 | 432.2459 | 175.1190 | 88.0631  |

3

| Spectrum information |          |        |           | Identification |          |    | Peptide Conf    |                 |
|----------------------|----------|--------|-----------|----------------|----------|----|-----------------|-----------------|
| Sample               | Fraction | Charge | Theor m/z | Δ Mass         | Sequence | Sc | One Step Method | Two Step Method |
| 6                    | 6        | 2      | 441.251   | 0.0007         | QSLGAHLR | 9  | 80.1            | 98.3            |

**QSLGAHLR**tgriffin\_koore004\_060611\_P6C\_6 #2424 RT: 19.82 AV: 1 NL: 1.07E4  
T: ITMS + c NSI d Full ms2 441.25@cid35.00 [110.00-895.00]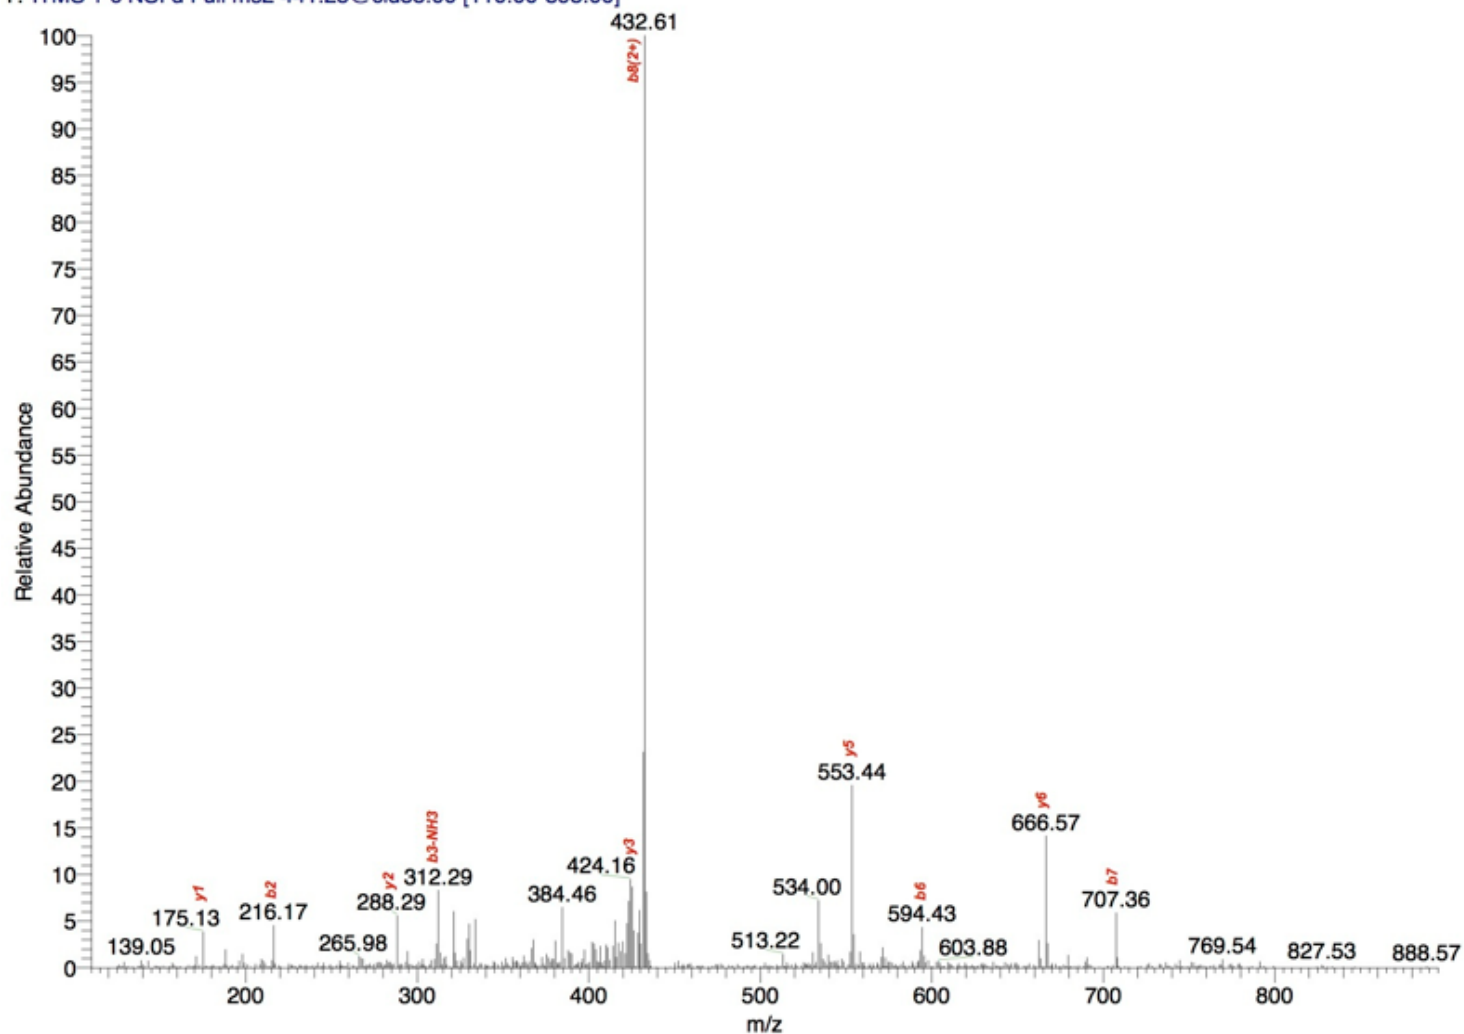

| Spectrum information |          |        |           | Identification |          |    | Peptide Conf    |                 |
|----------------------|----------|--------|-----------|----------------|----------|----|-----------------|-----------------|
| Sample               | Fraction | Charge | Theor m/z | $\Delta$ Mass  | Sequence | Sc | One Step Method | Two Step Method |
| 6                    | 6        | 2      | 441.251   | 0.0007         | QSLGAHLR | 9  | 80.1            | 98.3            |

Protein ID
Spectra
Summary Statistics

**Spectrum List**

| Spectrum      | Time | Prec MW  | Prec m/z | Prec z | Prot N | Best Sequence | Modifications | Conf | Theor MW | z |
|---------------|------|----------|----------|--------|--------|---------------|---------------|------|----------|---|
| 21.1.1.2204.1 |      | 812.4392 | 407.2268 | 2      | 27     | LNVENPK       |               | 87.4 | 812.4392 | 2 |

**Peptide ID Hypotheses - 21.1.1.2204.1**

| Conf | Sc | Prot N   | Sequence | Modifications   | Theor MW | Theor m/z | z | ΔMass   |
|------|----|----------|----------|-----------------|----------|-----------|---|---------|
| 87.4 | 9  | 27       | LNVENPK  |                 | 812.4392 | 407.2269  | 2 | -0.0001 |
| <1   | 7  | 426, 673 | NLHPNPK  |                 | 812.4214 | 407.2180  | 2 | 0.0176  |
| <1   | 8  |          | LHVQPNK  | Deamidated(O)@4 | 812.4392 | 407.2269  | 2 | -0.0001 |
| <1   | 7  |          | ARVEPNK  |                 | 812.4504 | 407.2325  | 2 | -0.0114 |
| <1   | 7  |          | INLDNPK  |                 | 812.4392 | 407.2269  | 2 | -0.0001 |
| <1   | 7  |          | IVGEGNPK |                 | 812.4392 | 407.2269  | 2 | -0.0001 |

**Precursor MS Region**

No Data Showing

**Fragmentation Evidence for Peptide**

LNVENPK

| Residue | b        | b+2      | y        | y+2      |
|---------|----------|----------|----------|----------|
| L       | 114.0913 | 57.5493  | 813.4485 | 407.2269 |
| N       | 228.1343 | 114.5708 | 700.3624 | 350.6849 |
| V       | 327.2027 | 164.1050 | 586.3195 | 293.6634 |
| E       | 466.2453 | 228.6263 | 487.2511 | 244.1292 |
| N       | 570.2882 | 285.6477 | 358.2085 | 179.6079 |
| P       | 667.3410 | 334.1741 | 244.1656 | 122.5864 |
| K       | 795.4359 | 398.2216 | 147.1128 | 74.0600  |

4

| Spectrum information |          |        |           | Identification |          |    | Peptide Conf    |                 |
|----------------------|----------|--------|-----------|----------------|----------|----|-----------------|-----------------|
| Sample               | Fraction | Charge | Theor m/z | Δ Mass         | Sequence | Sc | One Step Method | Two Step Method |
| 1                    | 3        | 2      | 407.226   | -0.0001        | LNVENPK  | 9  | 87.4            | 98.1            |

Protein ID
Spectra
Summary Statistics

**Spectrum List**

| Spectrum      | Time | Prec MW  | Prec m/z | Prec z | Prot N | Best Sequence | Modifications | Conf | Theor MW | z |
|---------------|------|----------|----------|--------|--------|---------------|---------------|------|----------|---|
| 21.1.1.2204.1 |      | 812.4391 | 407.2268 | 2      | 29     | LNVENPK       |               | 98.1 | 812.4392 | 2 |

**Peptide ID Hypotheses - 21.1.1.2204.1**

| Conf | Sc | Prot N   | Sequence | Modifications | Theor MW | Theor m/z | z | ΔMass   |
|------|----|----------|----------|---------------|----------|-----------|---|---------|
| 98.1 | 9  | 29       | LNVENPK  |               | 812.4392 | 407.2269  | 2 | -0.0001 |
| <1   | 7  | 493, 629 | NLHPNPK  |               | 812.4214 | 407.2180  | 2 | 0.0176  |
| <1   | 5  |          | DRNPFALR |               | 812.4504 | 407.2325  | 2 | -0.0114 |
| <1   | 5  |          | MEPVLPK  |               | 812.4466 | 407.2306  | 2 | -0.0075 |
| <1   | 5  |          | NLNPTVR  |               | 812.4504 | 407.2325  | 2 | -0.0114 |

**Precursor MS Region**

No Data Showing

**Fragmentation Evidence for Peptide**

LNVENPK

| Residue | b        | b+2      | y        | y+2      |
|---------|----------|----------|----------|----------|
| L       | 114.0913 | 57.5493  | 813.4465 | 407.2269 |
| N       | 228.1343 | 114.5708 | 700.3624 | 350.6849 |
| V       | 327.2027 | 164.1050 | 586.3195 | 293.6634 |
| E       | 456.2453 | 228.6263 | 487.2511 | 244.1292 |
| N       | 570.2882 | 285.6477 | 358.2085 | 179.6079 |
| P       | 667.3410 | 334.1741 | 244.1656 | 122.5864 |
| K       | 795.4359 | 398.2216 | 147.1128 | 74.0600  |

4

| Spectrum information |          |        |           | Identification |          |    | Peptide Conf    |                 |
|----------------------|----------|--------|-----------|----------------|----------|----|-----------------|-----------------|
| Sample               | Fraction | Charge | Theor m/z | Δ Mass         | Sequence | Sc | One Step Method | Two Step Method |
| 1                    | 3        | 2      | 407.226   | -0.0001        | LNVENPK  | 9  | 87.4            | 98.1            |

tgriffin\_koore004\_051211\_PIC3 #2204 RT: 20.11 AV: 1 NL: 1.76E4  
 T: ITMS + c NSI d Full ms2 407.23@cid35.00 [100.00-825.00]

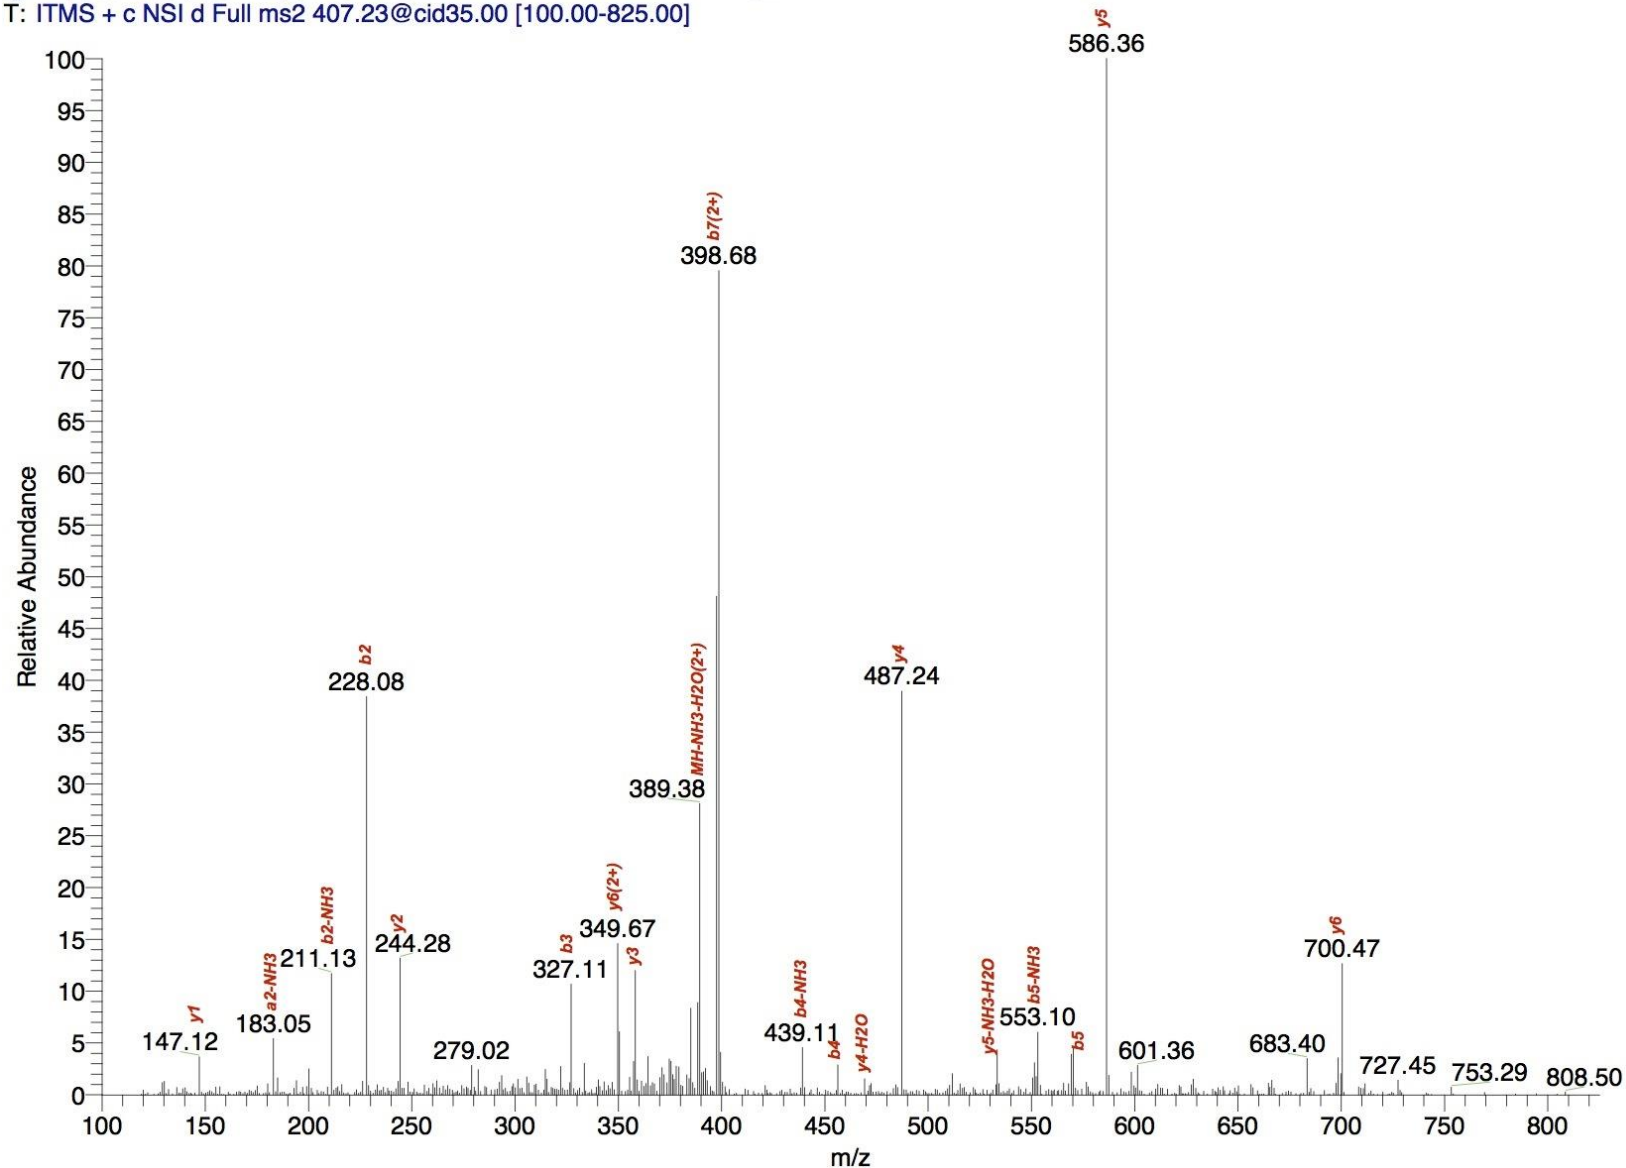

| Spectrum information |          |        |           | Identification |          |    | Peptide Conf    |                 |
|----------------------|----------|--------|-----------|----------------|----------|----|-----------------|-----------------|
| Sample               | Fraction | Charge | Theor m/z | Δ Mass         | Sequence | Sc | One Step Method | Two Step Method |
| 1                    | 3        | 2      | 407.226   | -0.0001        | LNVENPK  | 9  | 87.1            | 98.1            |

Protein ID
Spectra
Summary Statistics

**Spectrum List**

| Spectrum      | Time | Prec MW   | Prec m/z | Prec z | Prot N | Best Sequence | Modifications | Conf | Theor MW  | z |
|---------------|------|-----------|----------|--------|--------|---------------|---------------|------|-----------|---|
| 21.1.1.7802.1 |      | 1267.6927 | 634.8537 | 2      | 27     | WLSLPGETRPL   |               | 88.1 | 1267.6925 | 2 |

**Peptide ID Hypotheses - 21.1.1.7802.1**

| Conf | Sc | Prot N | Sequence     | Modifications | Theor MW  | Theor m/z | z | ΔMass   |
|------|----|--------|--------------|---------------|-----------|-----------|---|---------|
| 88.1 | 11 | 27     | WLSLPGETRPL  |               | 1267.6925 | 634.8535  | 2 | 0.0003  |
| <1   | 8  |        | DALINGSGPGLR |               | 1267.6885 | 634.8515  | 2 | 0.0043  |
| <1   | 8  |        | SVIISHGKSMAR |               | 1267.6997 | 634.8571  | 2 | -0.0069 |
| <1   | 8  |        | VQAPSGDLLAAR |               | 1267.6885 | 634.8515  | 2 | 0.0043  |

**Precursor MS Region**

No Data Showing

**Fragmentation Evidence for Peptide**

WLSLPGETRPL

| Residue | b         | b+2      | y         | y+2      |
|---------|-----------|----------|-----------|----------|
| W       | 187.0866  | 94.0469  | 1268.6997 | 634.8535 |
| L       | 300.1707  | 150.5890 | 1082.6204 | 541.8139 |
| S       | 387.2027  | 194.1050 | 969.5364  | 485.2718 |
| L       | 500.2867  | 250.6470 | 882.5043  | 441.7558 |
| P       | 597.3395  | 299.1734 | 769.4203  | 385.2138 |
| G       | 654.3610  | 327.6841 | 672.3675  | 336.6874 |
| E       | 783.4036  | 392.2054 | 615.3461  | 306.1767 |
| T       | 884.4512  | 442.7293 | 486.3035  | 243.6554 |
| R       | 1040.5524 | 520.7798 | 385.2558  | 193.1315 |
| P       | 1137.6051 | 569.3062 | 229.1547  | 115.0810 |
| L       | 1250.6892 | 625.8482 | 132.1019  | 66.5546  |

| Spectrum information |          |      |        |           | Identification |             |    | Peptide Conf    |                 |
|----------------------|----------|------|--------|-----------|----------------|-------------|----|-----------------|-----------------|
| Sample               | Fraction | Scan | Charge | Theor m/z | Δ Mass         | Sequence    | Sc | One Step Method | Two Step Method |
| 1                    | 3        | 7802 | 2      | 634.853   | 0.0003         | WLSLPGETRPL | 11 | 88.1            | 96.6            |

Protein ID
Spectra
Summary Statistics

**Spectrum List**

| Spectrum      | Time | Prec MW   | Prec m/z | Prec z | Prot N | Best Sequence | Modifications | Conf | Theor MW  | z |
|---------------|------|-----------|----------|--------|--------|---------------|---------------|------|-----------|---|
| 21.1.1.7802.1 |      | 1267.6927 | 634.8537 | 2      | 29     | WLSLPGETRPL   |               | 96.6 | 1267.6925 | 2 |

**Peptide ID Hypotheses - 21.1.1.7802.1**

| Conf | Sc | Prot N | Sequence     | Modifications | Theor MW  | Theor m/z | z | ΔMass   |
|------|----|--------|--------------|---------------|-----------|-----------|---|---------|
| 96.6 | 11 | 29     | WLSLPGETRPL  |               | 1267.6925 | 634.8535  | 2 | 0.0003  |
| <1   | 6  |        | HPALVIPEVGSR |               | 1267.6958 | 634.8552  | 2 | -0.0031 |
| <1   | 5  |        | DAYFRLTKVR   |               | 1267.7037 | 634.8591  | 2 | -0.0109 |
| <1   | 5  |        | EGLSKAKHEAAK |               | 1267.6885 | 634.8515  | 2 | 0.0043  |
| <1   | 5  |        | SCKEHIDNIKK  |               | 1267.6885 | 634.8515  | 2 | 0.0043  |

**Precursor MS Region**

No Data Showing

**Fragmentation Evidence for Peptide**

WLSLPGETRPL

| Residue | b         | b+2      | y         | y+2      |
|---------|-----------|----------|-----------|----------|
| W       | 187.0866  | 94.0469  | 1268.6997 | 634.8535 |
| L       | 300.1707  | 150.5890 | 1082.6204 | 541.8139 |
| S       | 387.2027  | 194.1050 | 969.5364  | 485.2718 |
| L       | 600.2867  | 250.6470 | 882.5043  | 441.7558 |
| P       | 597.3395  | 299.1734 | 769.4203  | 385.2138 |
| G       | 654.3610  | 327.6841 | 672.3675  | 336.6874 |
| E       | 783.4036  | 392.2054 | 615.3481  | 308.1767 |
| T       | 684.4512  | 442.7293 | 406.3035  | 243.6554 |
| R       | 1040.5524 | 520.7798 | 385.2558  | 193.1315 |
| P       | 1137.6051 | 569.3062 | 229.1547  | 115.0810 |
| L       | 1250.6892 | 625.8482 | 132.1019  | 66.5546  |

5

| Spectrum information |          |      |        | Identification |        |             | Peptide Conf |                 |                 |
|----------------------|----------|------|--------|----------------|--------|-------------|--------------|-----------------|-----------------|
| Sample               | Fraction | Scan | Charge | Theor m/z      | Δ Mass | Sequence    | Sc           | One Step Method | Two Step Method |
| 1                    | 3        | 7802 | 2      | 634.853        | 0.0003 | WLSLPGETRPL | 11           | 88.1            | 96.6            |

tgriffin\_koore004\_051211\_PIC3 #7802 RT: 58.05 AV: 1 NL: 4.22E3  
 T: ITMS + c NSI d Full ms2 634.85@cid35.00 [160.00-1280.00]

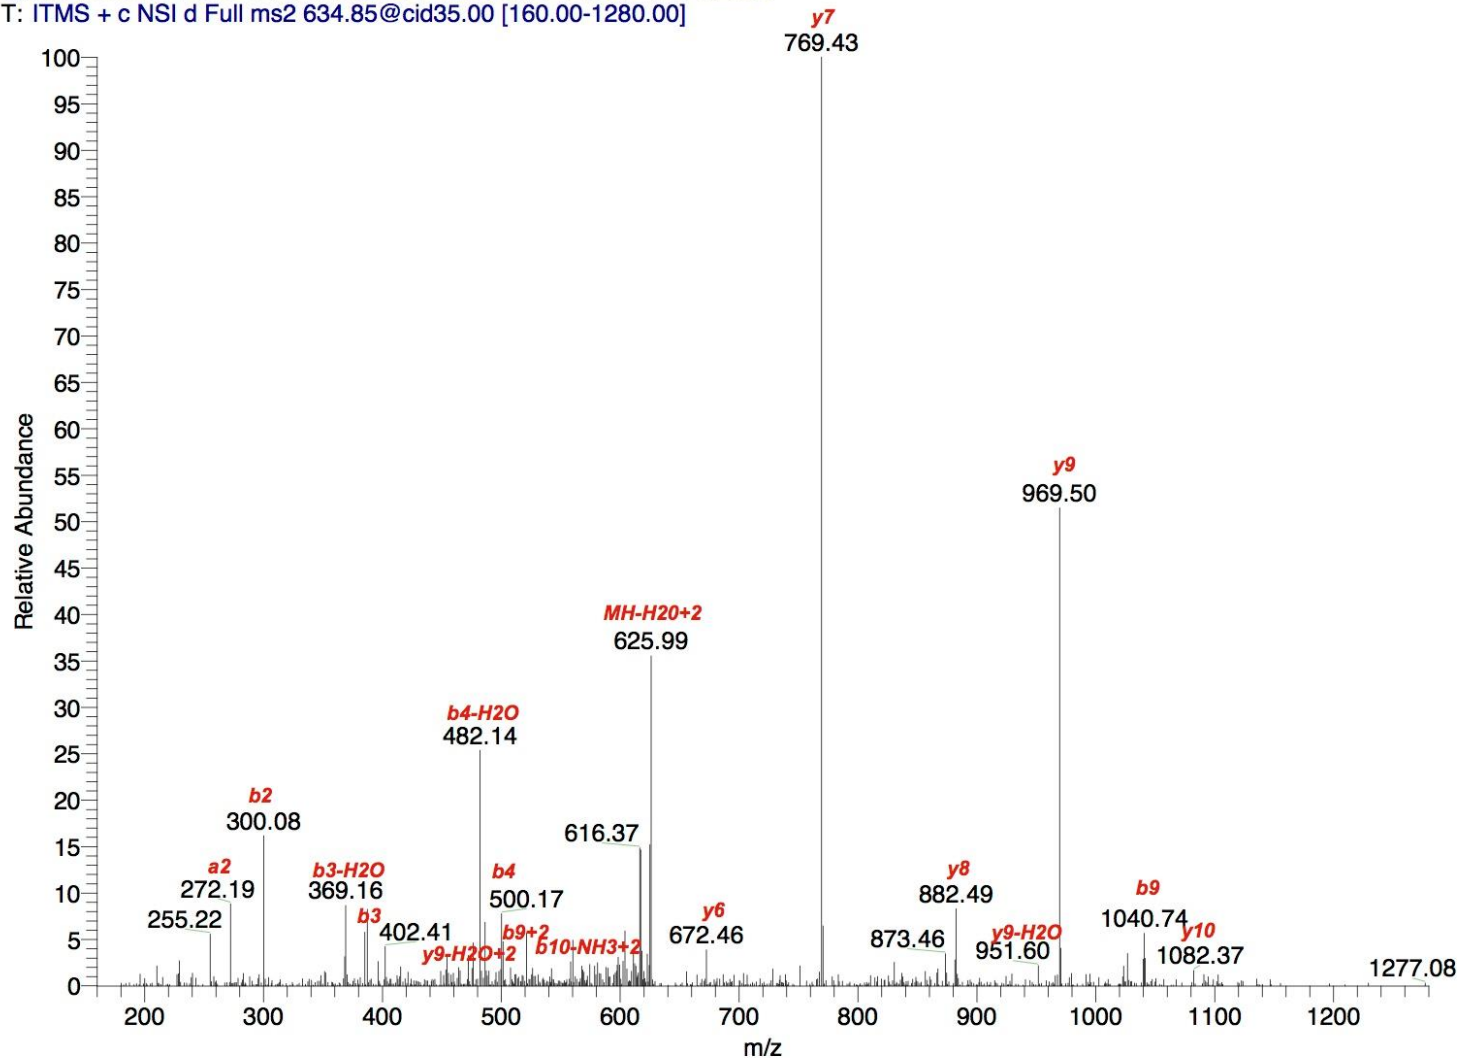

5

| Spectrum information |          |      |        |           | Identification |             |    | Peptide Conf    |                 |
|----------------------|----------|------|--------|-----------|----------------|-------------|----|-----------------|-----------------|
| Sample               | Fraction | Scan | Charge | Theor m/z | Δ Mass         | Sequence    | Sc | One Step Method | Two Step Method |
| 1                    | 3        | 7802 | 2      | 634.853   | 0.0003         | WLSLPGETRPL | 11 | 88.1            | 96.6            |



**Workflow Tasks**

- Identify Proteins
- LC...
- Spot-Based (MS only)...
- Spot-Based (MS and MS/MS)...
- View
- Analysis Log...
- Result...
- Export
- Peptide Summary...
- Protein Summary...

Protein ID Spectra Summary Statistics

**Spectrum List**

| Spectrum      | Time | Prec MW   | Prec m/z | Prec z | Prot N | Best Sequence | Modifications | Conf | Theor MW  | z |
|---------------|------|-----------|----------|--------|--------|---------------|---------------|------|-----------|---|
| 41.1.1.4385.1 |      | 1021.4871 | 511.7508 | 2      | 873    | EHFAIYKD      |               | 66.1 | 1021.4869 | 2 |

**Peptide ID Hypotheses - 41.1.1.4385.1**

| Conf | Sc | Prot N | Sequence   | Modifications  | Theor MW  | Theor m/z | z | ΔMass   |
|------|----|--------|------------|----------------|-----------|-----------|---|---------|
| 66.1 | 8  | 873    | EHFAIYKD   |                | 1021.4869 | 511.7507  | 2 | 0.0002  |
| <1   | 7  |        | HTWLERDK   | Oxidation(M)@1 | 1021.4863 | 511.7504  | 2 | 0.0008  |
| <1   | 6  |        | EHEQKHSK   |                | 1021.4941 | 511.7543  | 2 | -0.0070 |
| <1   | 6  |        | EHTTEHLR   |                | 1021.4941 | 511.7543  | 2 | -0.0070 |
| <1   | 6  |        | KEQSGGSSSR |                | 1021.4788 | 511.7467  | 2 | 0.0082  |

**Precursor MS Region**

No Data Showing

**Fragmentation Evidence for Peptide**

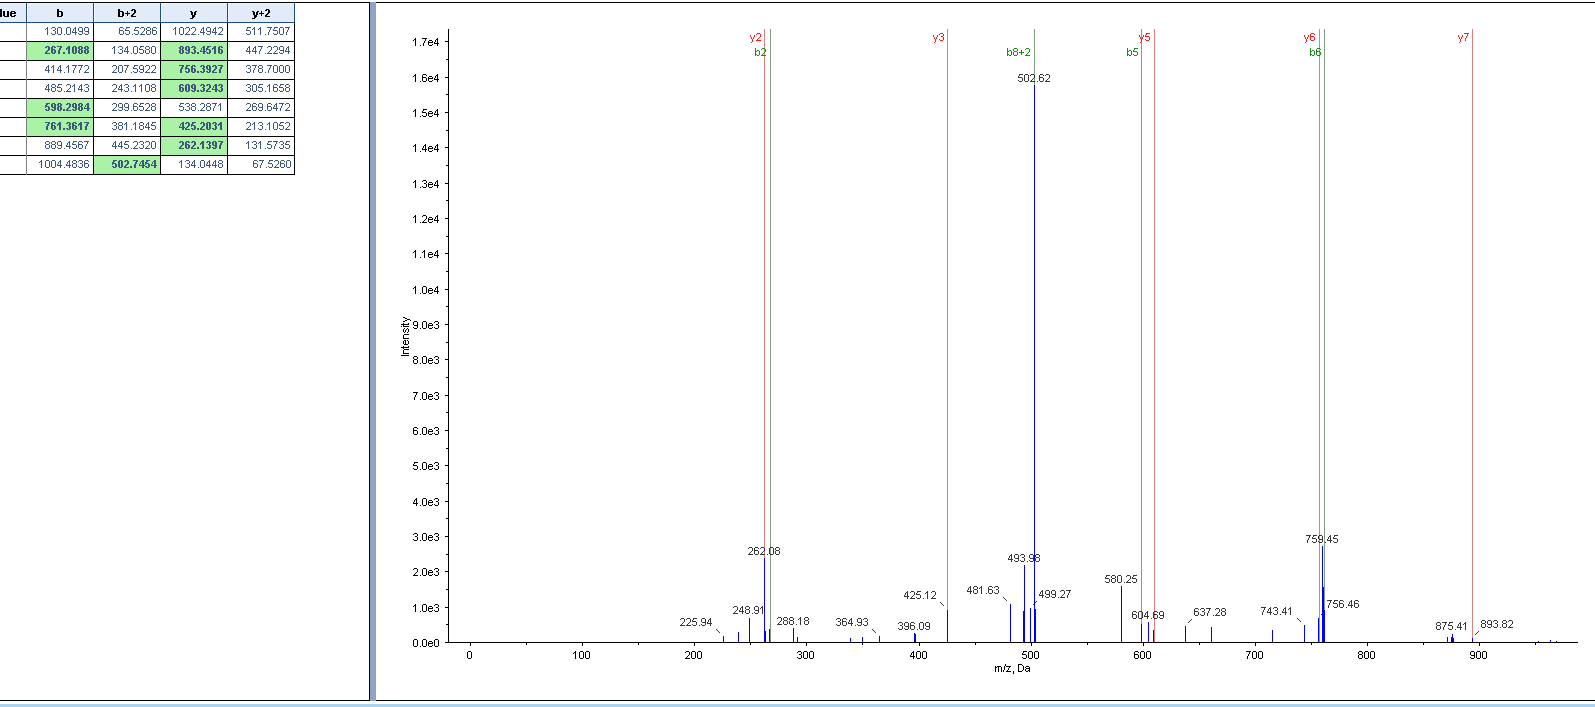

6

| Spectrum information |          |      |        | Identification |        |          | Peptide Conf |                 |                 |
|----------------------|----------|------|--------|----------------|--------|----------|--------------|-----------------|-----------------|
| Sample               | Fraction | Scan | Charge | Theor m/z      | Δ Mass | Sequence | Sc           | One Step Method | Two Step Method |
| 6                    | 6        | 4385 | 2      | 511.751        | 0.0002 | EHFAIYKD | 8            | 66.1            | 95.5            |

**Workflow Tasks**

- Identify Proteins
- LC...
- Spot-Based (MS only)...
- Spot-Based (MS and MS/MS)...
- View
- Analysis Log...
- Result...
- Export
- Peptide Summary...
- Protein Summary...

Protein ID Spectra Summary Statistics

**Spectrum List**

| Spectrum      | Time | Prec MW   | Prec m/z | Prec z | Prot N | Best Sequence | Modifications | Conf | Theor MW  | z |
|---------------|------|-----------|----------|--------|--------|---------------|---------------|------|-----------|---|
| 41.1.1.4385.1 |      | 1021.4871 | 511.7508 | 2      | 630    | EHFAIYKD      |               | 95.5 | 1021.4869 | 2 |

**Peptide ID Hypotheses - 41.1.1.4385.1**

| Conf | Sc | Prot N | Sequence   | Modifications   | Theor MW  | Theor m/z | z | ΔMass   |
|------|----|--------|------------|-----------------|-----------|-----------|---|---------|
| 95.5 | 8  | 630    | EHFAIYKD   |                 | 1021.4869 | 511.7507  | 2 | 0.0002  |
| <1   | 6  |        | DFRGQRDK   | Deamidated(Q)@5 | 1021.4941 | 511.7543  | 2 | -0.0070 |
| <1   | 6  |        | KEQSGGSSSR |                 | 1021.4788 | 511.7467  | 2 | 0.0082  |
| <1   | 6  |        | MTHVYLDK   | Oxidation(M)@1  | 1021.4903 | 511.7524  | 2 | -0.0032 |
| <1   | 5  |        | EFDRGRDK   |                 | 1021.4941 | 511.7543  | 2 | -0.0070 |

**Precursor MS Region**

No Data Showing

**Fragmentation Evidence for Peptide**

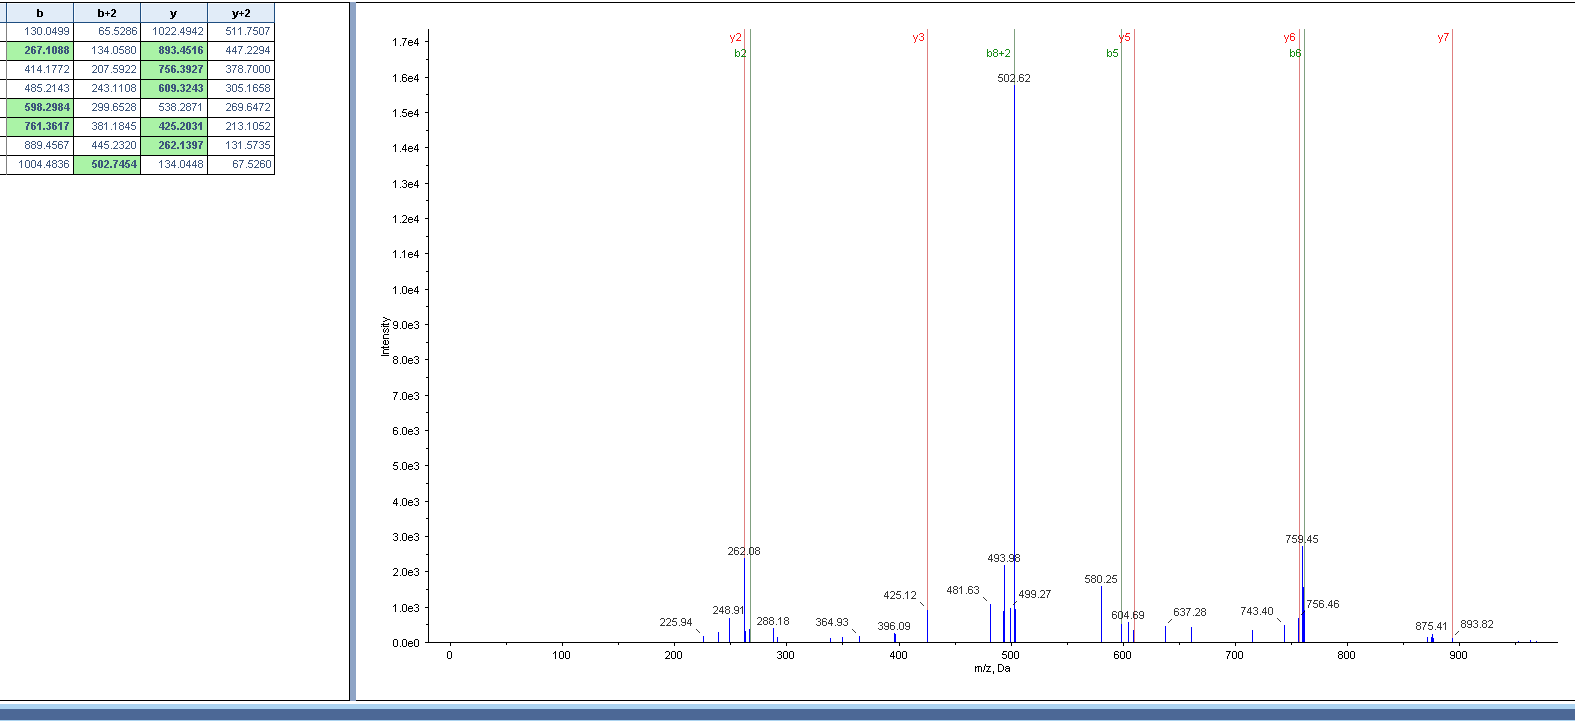

6

| Spectrum information |          |      |        | Identification |        |          | Peptide Conf |                 |                 |
|----------------------|----------|------|--------|----------------|--------|----------|--------------|-----------------|-----------------|
| Sample               | Fraction | Scan | Charge | Theor m/z      | Δ Mass | Sequence | Sc           | One Step Method | Two Step Method |
| 6                    | 6        | 4385 | 2      | 511.751        | 0.0002 | EHFAIYKD | 8            | 66.1            | 95.5            |

tgriffin\_koore004\_060611\_P6C\_6 #4385 RT: 34.54 AV: 1 NL: 1.58E4  
T: ITMS + c NSI d Full ms2 511.75@cid35.00 [130.00-1035.00]

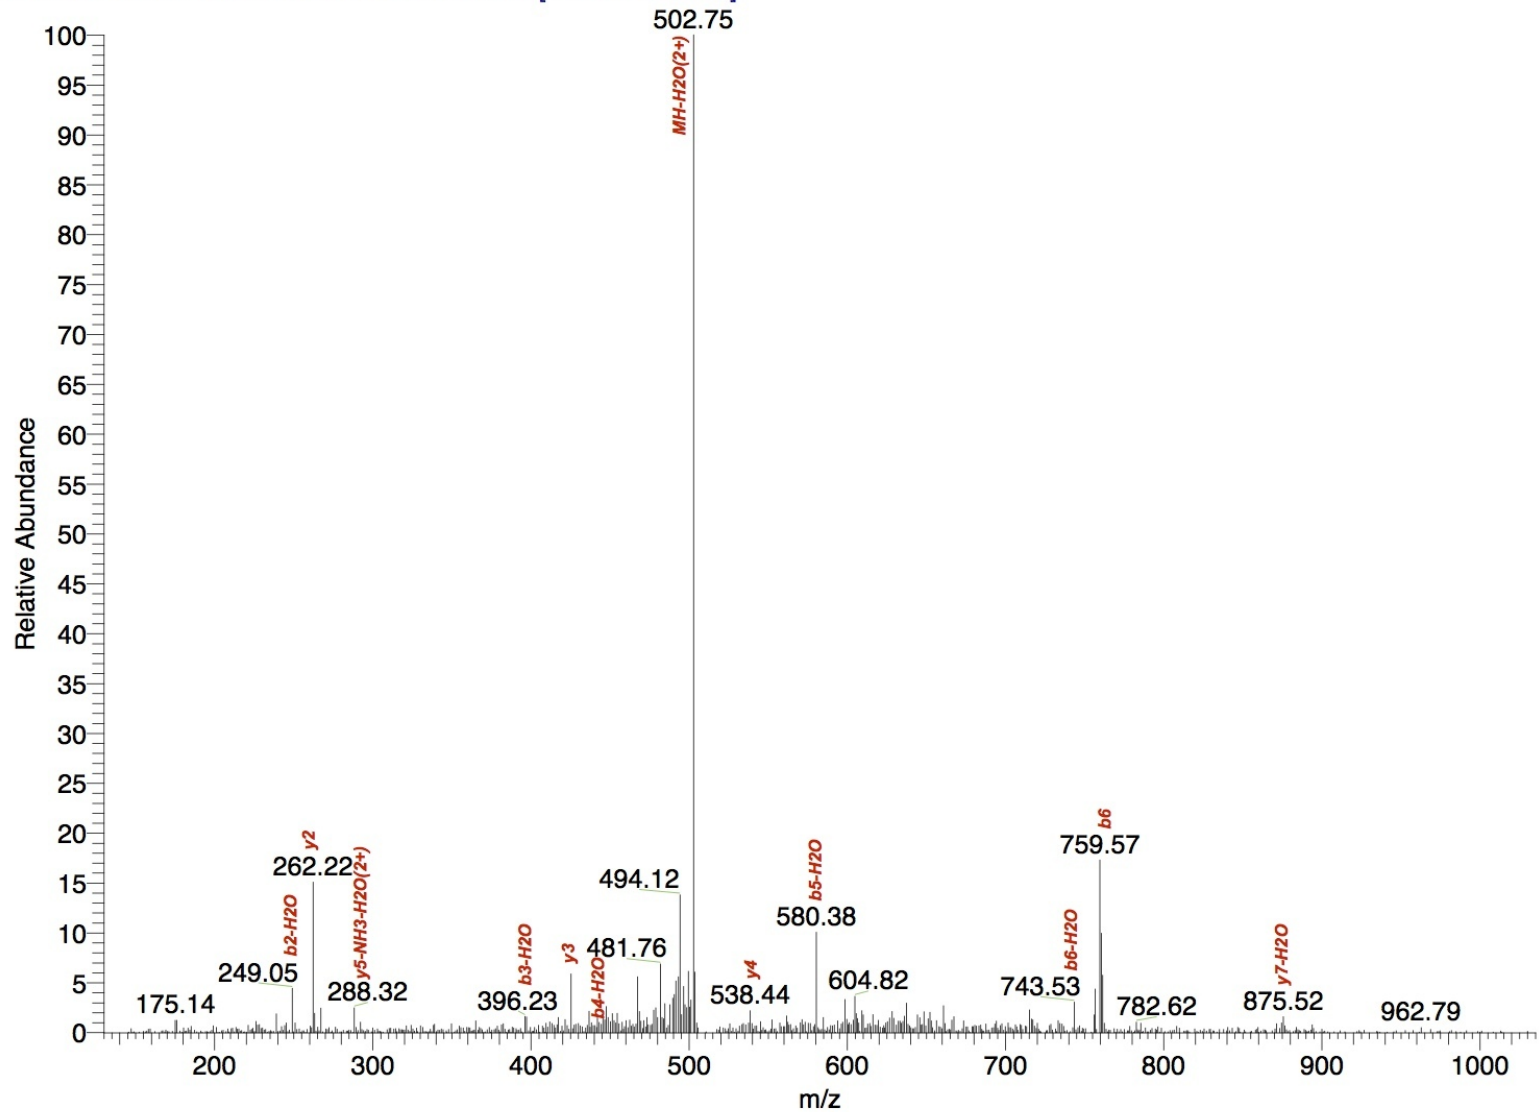

6

| Spectrum information |          |      |        |           | Identification |          |    | Peptide Conf    |                 |
|----------------------|----------|------|--------|-----------|----------------|----------|----|-----------------|-----------------|
| Sample               | Fraction | Scan | Charge | Theor m/z | D Mass         | Sequence | Sc | One Step Method | Two Step Method |
| 6                    | 6        | 4385 | 2      | 511.751   | 0.0002         | EHFAIYKD | 8  | 66.1            | 95.5            |

Identified in  
two-step but  
not in one-  
step method.

PROTEOGENOMICS

| Spectrum information |          |        |           | Identification |              |    | Peptide Conf          |                      |
|----------------------|----------|--------|-----------|----------------|--------------|----|-----------------------|----------------------|
| Sample               | Fraction | Charge | Theor m/z | $\Delta$ Mass  | Sequence     | Sc | One Step Method       | Two Step Method      |
| 1 6                  | 3        | 2      | 510.232   | 0.0061         | MDNAIGDQR    | 9  | <a href="#">66.1</a>  | <a href="#">96.7</a> |
| 2 4                  | 3        | 2      | 498.774   | -0.0005        | MSPHLQRK     | 9  | <a href="#">92.1</a>  | <a href="#">96.2</a> |
| 3 6                  | 5        | 2      | 574.2341  | 0.0019         | GEEEGEGGGGGR | 9  | <a href="#">84.8</a>  | <a href="#">97.5</a> |
| 4 6                  | 5        | 2      | 679.8591  | -0.0093        | RTSVCPRTWPR  | 10 | <a href="#">73.85</a> | <a href="#">98.1</a> |

Protein ID
Spectra
Summary Statistics

**Spectrum List**

| Spectrum      | Time | Prec MW   | Prec m/z | Prec z | Prot N | Best Sequence | Modifications | Conf | Theor MW  | z |
|---------------|------|-----------|----------|--------|--------|---------------|---------------|------|-----------|---|
| 35.1.1.3655.1 |      | 1018.4564 | 510.2354 | 2      | 1352   | MDNAIGDQR     |               | 66.1 | 1018.4502 | 2 |

**Peptide ID Hypotheses - 35.1.1.3655.1**

| Conf | Sc | Prot N | Sequence  | Modifications   | Theor MW  | Theor m/z | z | ΔMass   |
|------|----|--------|-----------|-----------------|-----------|-----------|---|---------|
| 66.1 | 9  | 1352   | MDNAIGDQR |                 | 1018.4502 | 510.2324  | 2 | 0.0061  |
| 23.6 | 9  |        | HWLNANVR  | Deamidated(N)@2 | 1018.4655 | 510.2400  | 2 | -0.0091 |
| <1   | 7  |        | EAUSGGAMR |                 | 1018.4621 | 510.2383  | 2 | -0.0058 |
| <1   | 7  |        | IEEESAGER |                 | 1018.4567 | 510.2366  | 2 | -0.0004 |
| <1   | 7  |        | HWNNKQNR  | Deamidated(N)@2 | 1018.4614 | 510.2380  | 2 | -0.0051 |

**Precursor MS Region**

No Data Showing

**Fragmentation Evidence for Peptide**

MDNAIGDQR

| Residue | b         | b+2      | y         | y+2      |
|---------|-----------|----------|-----------|----------|
| M       | 132.0478  | 66.5275  | 1019.4575 | 510.2324 |
| D       | 247.0747  | 124.0410 | 888.4170  | 444.7121 |
| N       | 361.1176  | 181.0625 | 773.3900  | 387.1987 |
| A       | 432.1547  | 216.5810 | 659.3471  | 330.1772 |
| I       | 545.2388  | 273.1230 | 588.3100  | 294.6586 |
| G       | 602.2603  | 301.6338 | 475.2259  | 238.1166 |
| D       | 717.2872  | 359.1472 | 418.2045  | 209.6059 |
| Q       | 845.3468  | 423.1765 | 303.1775  | 152.0924 |
| R       | 1001.4469 | 501.2271 | 175.1190  | 88.0631  |

1

| Sample | Fraction | Charge | Theor m/z | Δ Mass | Sequence  | Sc | One Step Method | Two Step Method |
|--------|----------|--------|-----------|--------|-----------|----|-----------------|-----------------|
| 6      | 6        | 2      | 510.232   | 0.0061 | MDNAIGDQR | 9  | 66.1            | 96.7            |

Protein ID
Spectra
Summary Statistics

**Spectrum List**

| Spectrum      | Time | Prec MW   | Prec m/z | Prec z | Prot N | Best Sequence | Modifications | Conf | Theor MW  | z |
|---------------|------|-----------|----------|--------|--------|---------------|---------------|------|-----------|---|
| 35.1.1.3655.1 |      | 1018.4564 | 510.2354 | 2      | 1032   | MDNAIGDQR     |               | 96.7 | 1018.4502 | 2 |

**Peptide ID Hypotheses - 35.1.1.3655.1**

| Conf | Sc | Prot N | Sequence   | Modifications   | Theor MW  | Theor m/z | z | ΔMass   |
|------|----|--------|------------|-----------------|-----------|-----------|---|---------|
| 96.7 | 9  | 1032   | MDNAIGDQR  |                 | 1018.4502 | 510.2324  | 2 | 0.0061  |
| <1   | 6  |        | CLWAGGAGQR | Deamidated(Q)@9 | 1018.4655 | 510.2400  | 2 | -0.0091 |
| <1   | 6  |        | DESQKAGER  |                 | 1018.4680 | 510.2412  | 2 | -0.0116 |
| <1   | 6  |        | GTDQVSAGEE |                 | 1018.4680 | 510.2412  | 2 | -0.0116 |
| <1   | 6  |        | MILLDFHK   | Deamidated(N)@2 | 1018.4542 | 510.2344  | 2 | 0.0021  |

**Precursor MS Region**

No Data Showing

**Fragmentation Evidence for Peptide**

MDNAIGDQR

| Residue | b         | b+2      | y         | y+2      |
|---------|-----------|----------|-----------|----------|
| M       | 132.0478  | 66.5275  | 1018.4575 | 510.2324 |
| D       | 247.0747  | 124.0410 | 888.4170  | 444.7121 |
| N       | 361.1176  | 181.0625 | 773.3900  | 387.1987 |
| A       | 432.1647  | 216.5810 | 659.3471  | 330.1772 |
| I       | 545.2388  | 273.1230 | 588.3100  | 294.6586 |
| G       | 602.2603  | 301.6338 | 475.2259  | 238.1166 |
| D       | 717.2872  | 359.1472 | 418.2045  | 209.6059 |
| Q       | 845.3458  | 423.1765 | 303.1775  | 152.0924 |
| R       | 1001.4469 | 501.2271 | 175.1190  | 88.0631  |

| 1 | Sample | Fraction | Charge | Theor m/z | Δ Mass  | Sequence | Sc        | One Step Method | Two Step Method |
|---|--------|----------|--------|-----------|---------|----------|-----------|-----------------|-----------------|
|   |        | 6        | 3      | 2         | 510.232 | 0.0061   | MDNAIGDQR | 9               | 66.1            |

tgriffin\_koore004\_060611\_P6C\_3 #3655 RT: 33.44 AV: 1 NL: 6.66E4  
 T: ITMS + c NSI d Full ms2 510.23@cid35.00 [130.00-1035.00]

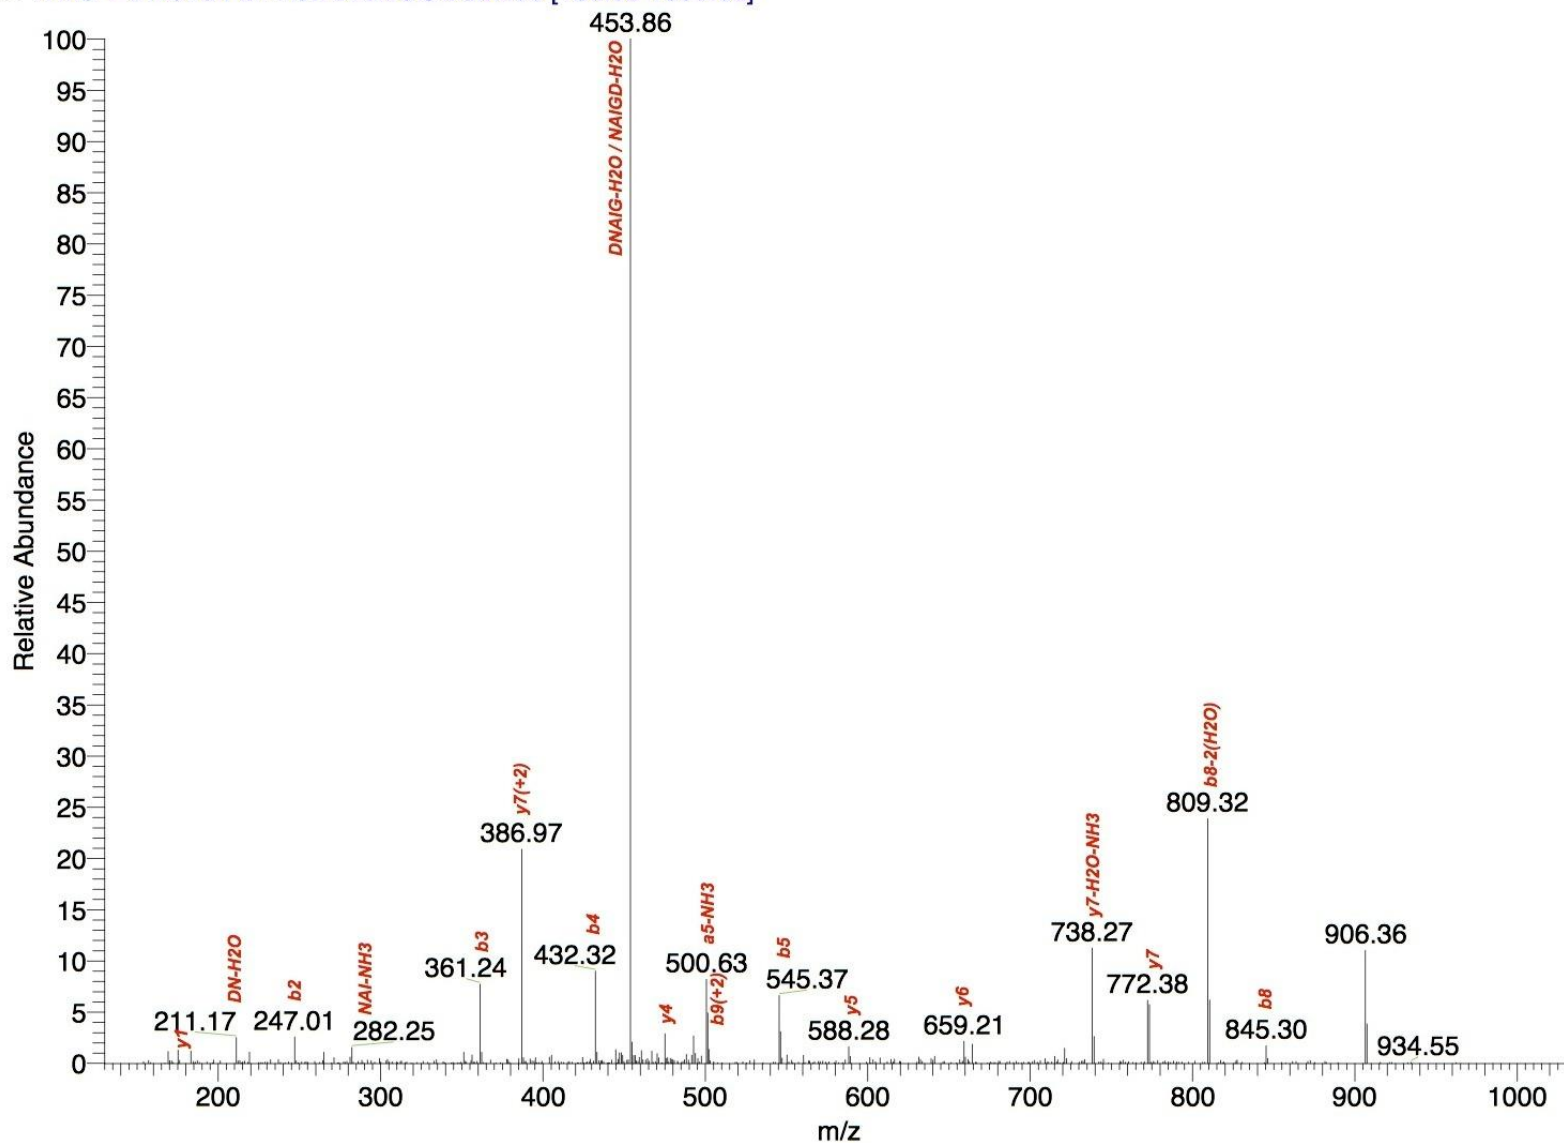

| Sample | Fraction | Charge | Theor m/z | $\Delta$ Mass | Sequence  | Sc | One Step Method | Two Step Method |
|--------|----------|--------|-----------|---------------|-----------|----|-----------------|-----------------|
| 6      | 3        | 2      | 510.232   | 0.0061        | MDNAIGDQR | 9  | 66.1            | 96.7            |

**Workflow Tasks**

- Identify Proteins
- LC...
- Spot-Based (MS only)...
- Spot-Based (MS and MS/MS)...
- View
- Analysis Log...
- Result...
- Export
- Peptide Summary...
- Protein Summary...

| Protein ID           |      |          |          |        |        |               | Spectra       |  |  | Summary Statistics |          |   |
|----------------------|------|----------|----------|--------|--------|---------------|---------------|--|--|--------------------|----------|---|
| <b>Spectrum List</b> |      |          |          |        |        |               |               |  |  |                    |          |   |
| Spectrum             | Time | Prec MW  | Prec m/z | Prec z | Prot N | Best Sequence | Modifications |  |  | Conf               | Theor MW | z |
| 7.1.1.6097.1         |      | 995.5330 | 498.7737 | 2      | 1000   | MSPHLQRK      |               |  |  | 92.1               | 995.5334 | 2 |

| Peptide ID Hypotheses - 7.1.1.6097.1 |    |        |            |                |          |           |   |         |                 | Precursor MS Region |  |  |
|--------------------------------------|----|--------|------------|----------------|----------|-----------|---|---------|-----------------|---------------------|--|--|
| Conf                                 | Sc | Prot N | Sequence   | Modifications  | Theor MW | Theor m/z | z | ΔMass   | No Data Showing |                     |  |  |
| 92.1                                 | 9  | 1000   | MSPHLQRK   |                | 995.5334 | 498.7740  | 2 | -0.0005 |                 |                     |  |  |
| <1                                   | 4  | 1028   | HILELFSK   | Oxidation(M)@1 | 995.5361 | 498.7754  | 2 | -0.0032 |                 |                     |  |  |
| <1                                   | 7  |        | MAFPAPAGLR | Oxidation(M)@1 | 995.5222 | 498.7684  | 2 | 0.0107  |                 |                     |  |  |
| <1                                   | 7  |        | SVPFIFVST  |                | 995.5328 | 498.7737  | 2 | 0.0001  |                 |                     |  |  |
| <1                                   | 6  |        | CVHLLNAAR  |                | 995.5334 | 498.7740  | 2 | -0.0005 |                 |                     |  |  |
| <1                                   | 6  |        | EMISLLYK   |                | 995.5361 | 498.7754  | 2 | -0.0032 |                 |                     |  |  |

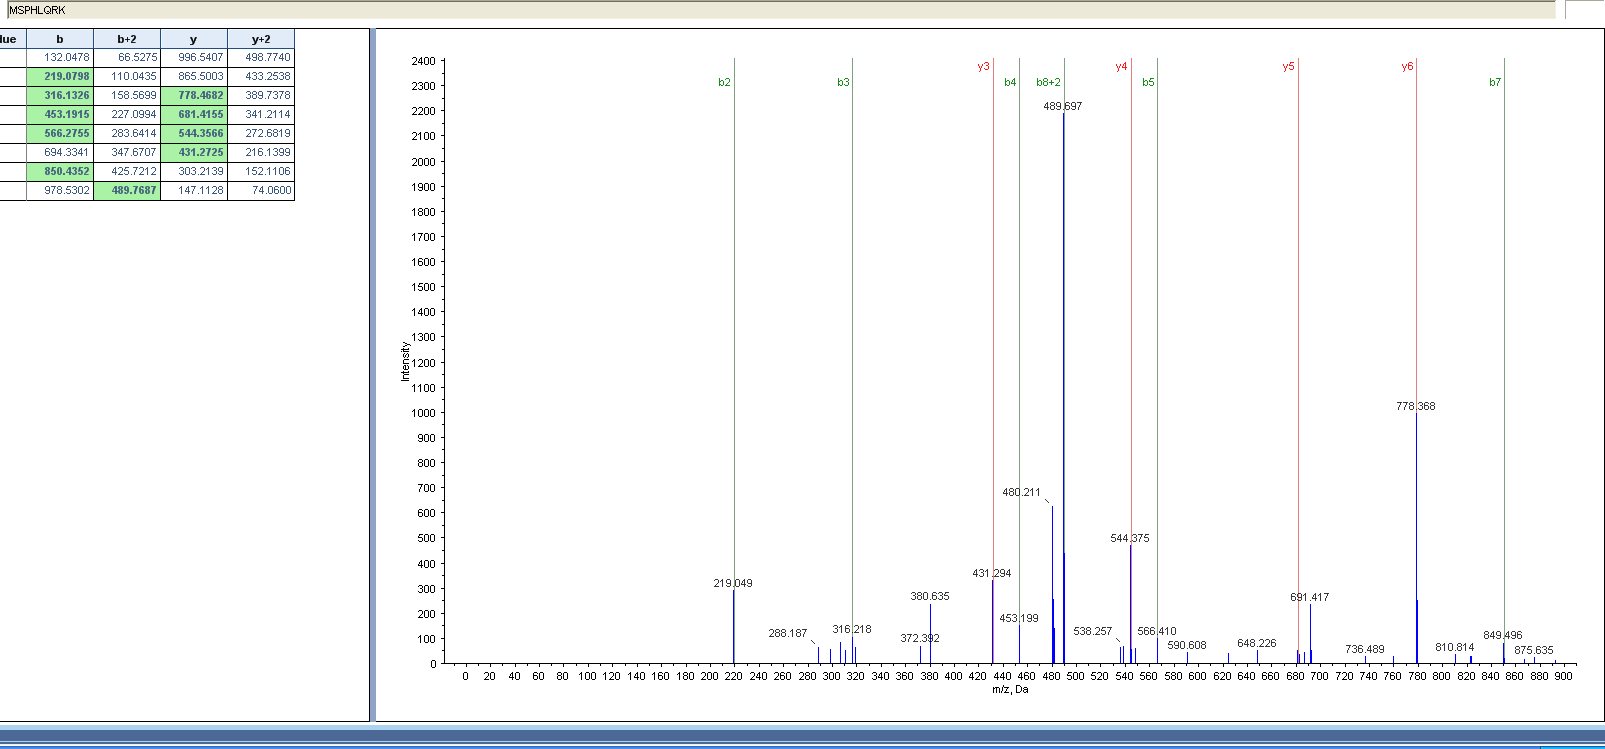

2

| Spectrum information |          |        |           | Identification |          |    | Peptide Conf    |                 |
|----------------------|----------|--------|-----------|----------------|----------|----|-----------------|-----------------|
| Sample               | Fraction | Charge | Theor m/z | Δ Mass         | Sequence | Sc | One Step Method | Two Step Method |
| 4                    | 3        | 2      | 498.774   | -0.0005        | MSPHLQRK | 9  | 92.1            | 96.2            |



Protein ID
Spectra
Summary Statistics

**Spectrum List**

| Spectrum     | Time | Prec MW  | Prec m/z | Prec z | Prot N | Best Sequence | Modifications | Conf | Theor MW | z |
|--------------|------|----------|----------|--------|--------|---------------|---------------|------|----------|---|
| 7.1.1.6097.1 |      | 995.5330 | 498.7737 | 2      | 1048   | MSPHLQRK      |               | 96.2 | 995.5334 | 2 |

**Peptide ID Hypotheses - 7.1.1.6097.1**

| Conf | Sc | Prot N | Sequence   | Modifications  | Theor MW | Theor m/z | z | ΔMass   |
|------|----|--------|------------|----------------|----------|-----------|---|---------|
| 96.2 | 9  | 1048   | MSPHLQRK   |                | 995.5334 | 498.7740  | 2 | -0.0006 |
| <1   | 7  |        | MAPPAPAGLR | Oxidation(M)@1 | 995.5222 | 498.7684  | 2 | 0.0107  |
| <1   | 6  |        | FALIQNYK   |                | 995.5440 | 498.7793  | 2 | -0.0111 |
| <1   | 5  |        | ALIYSTSMK  |                | 995.5267 | 498.7717  | 2 | 0.0042  |
| <1   | 5  |        | EGQVTLPLR  |                | 995.5400 | 498.7773  | 2 | -0.0071 |

**Precursor MS Region**

No Data Showing

**Fragmentation Evidence for Peptide**

MSPHLQRK

| Residue | b        | b+2      | y        | y+2      |
|---------|----------|----------|----------|----------|
| M       | 132.0478 | 66.5275  | 998.5407 | 498.7740 |
| S       | 219.0798 | 110.0435 | 865.5003 | 433.2538 |
| P       | 316.1326 | 158.5699 | 778.4682 | 389.7378 |
| H       | 453.1915 | 227.0994 | 681.4155 | 341.2114 |
| L       | 566.2755 | 283.6414 | 544.3566 | 272.6819 |
| Q       | 694.3341 | 347.6707 | 431.2725 | 216.1399 |
| R       | 850.4352 | 425.7212 | 303.2139 | 152.1106 |
| K       | 978.5302 | 489.7687 | 147.1128 | 74.0600  |

2

| Spectrum information |          |        |           | Identification |          |    | Peptide Conf    |                 |
|----------------------|----------|--------|-----------|----------------|----------|----|-----------------|-----------------|
| Sample               | Fraction | Charge | Theor m/z | Δ Mass         | Sequence | Sc | One Step Method | Two Step Method |
| 4                    | 3        | 2      | 498.774   | -0.0005        | MSPHLQRK | 9  | 92.1            | 96.2            |

tgriffin\_koore004\_040511\_patient4\_control\_CC\_Fr3 #6097 RT: 45.97 AV: 1 NL: 2.19E3  
 T: ITMS + c NSI d Full ms2 498.77@cid35.00 [125.00-1010.00]

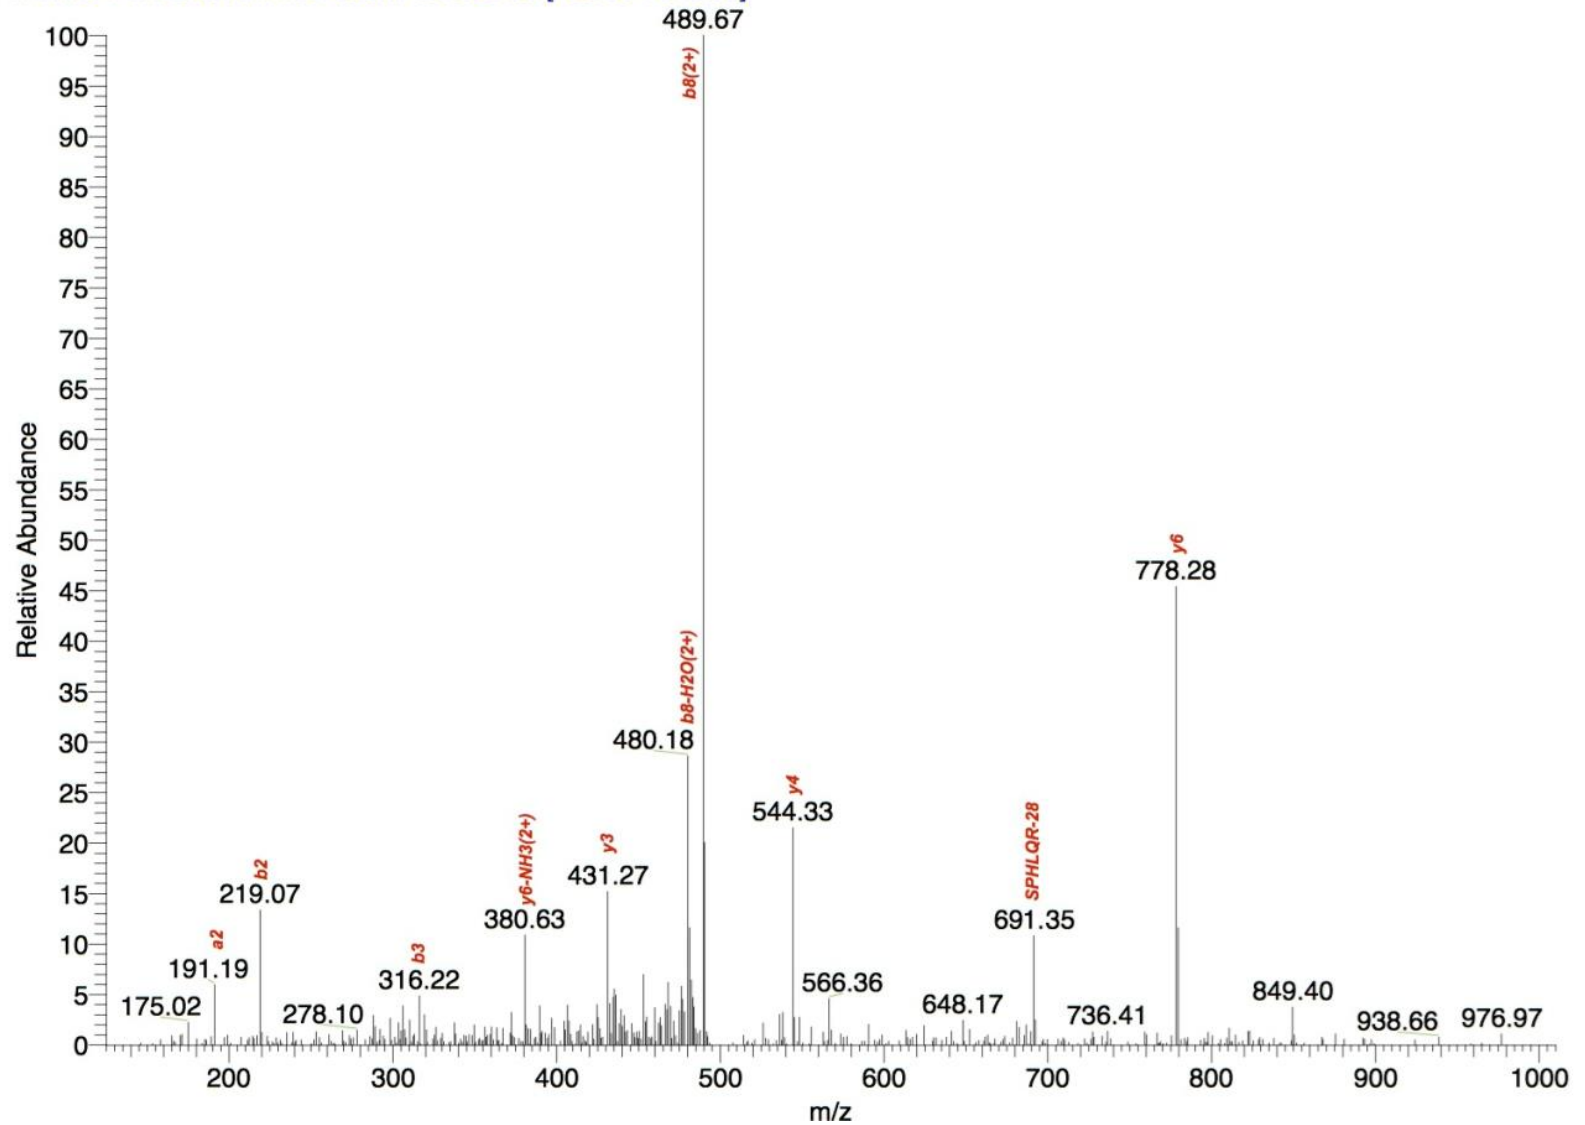

| Spectrum information |          |        |           | Identification |          |    | Peptide Conf    |                 |
|----------------------|----------|--------|-----------|----------------|----------|----|-----------------|-----------------|
| Sample               | Fraction | Charge | Theor m/z | $\Delta$ Mass  | Sequence | Sc | One Step Method | Two Step Method |
| 4                    | 3        | 2      | 498.774   | -0.0005        | MSPHLQRK | 9  | 92.1            | 96.2            |

**Workflow Tasks**

- Identify Proteins
- LC...
- Spot-Based (MS only)...
- Spot-Based (MS and MS/MS)...
- View
- Analysis Log...
- Result...
- Export
- Peptide Summary...
- Protein Summary...

Protein ID Spectra Summary Statistics

**Spectrum List**

| Spectrum      | Time | Prec MW   | Prec m/z | Prec z | Prot N | Best Sequence | Modifications | Conf | Theor MW  | z |
|---------------|------|-----------|----------|--------|--------|---------------|---------------|------|-----------|---|
| 39.1.1.2617.1 |      | 1146.4733 | 574.2439 | 2      | 1131   | GEEEGEGGGGGGR |               | 84.8 | 1146.4537 | 2 |

**Peptide ID Hypotheses - 39.1.1.2617.1**

| Conf | Sc | Prot N | Sequence      | Modifications        | Theor MW  | Theor m/z | z | ΔMass   |
|------|----|--------|---------------|----------------------|-----------|-----------|---|---------|
| 84.8 | 9  | 1131   | GEEEGEGGGGGGR |                      | 1146.4537 | 574.2341  | 2 | 0.0195  |
| <1   | 7  |        | DCPGADSAQAGR  |                      | 1146.4724 | 574.2435  | 2 | 0.0008  |
| <1   | 6  |        | EWFGSPQEW     | Glu->pyro-Glu@N-term | 1146.4771 | 574.2458  | 2 | -0.0038 |
| <1   | 6  |        | GCGNERNGP SR  | Deamidated(N)@4      | 1146.4836 | 574.2491  | 2 | -0.0104 |
| <1   | 6  |        | QEGEAGSGEGEK  | Deamidated(Q)@1      | 1146.4789 | 574.2457  | 2 | -0.0057 |

**Precursor MS Region**

No Data Showing

**Fragmentation Evidence for Peptide**

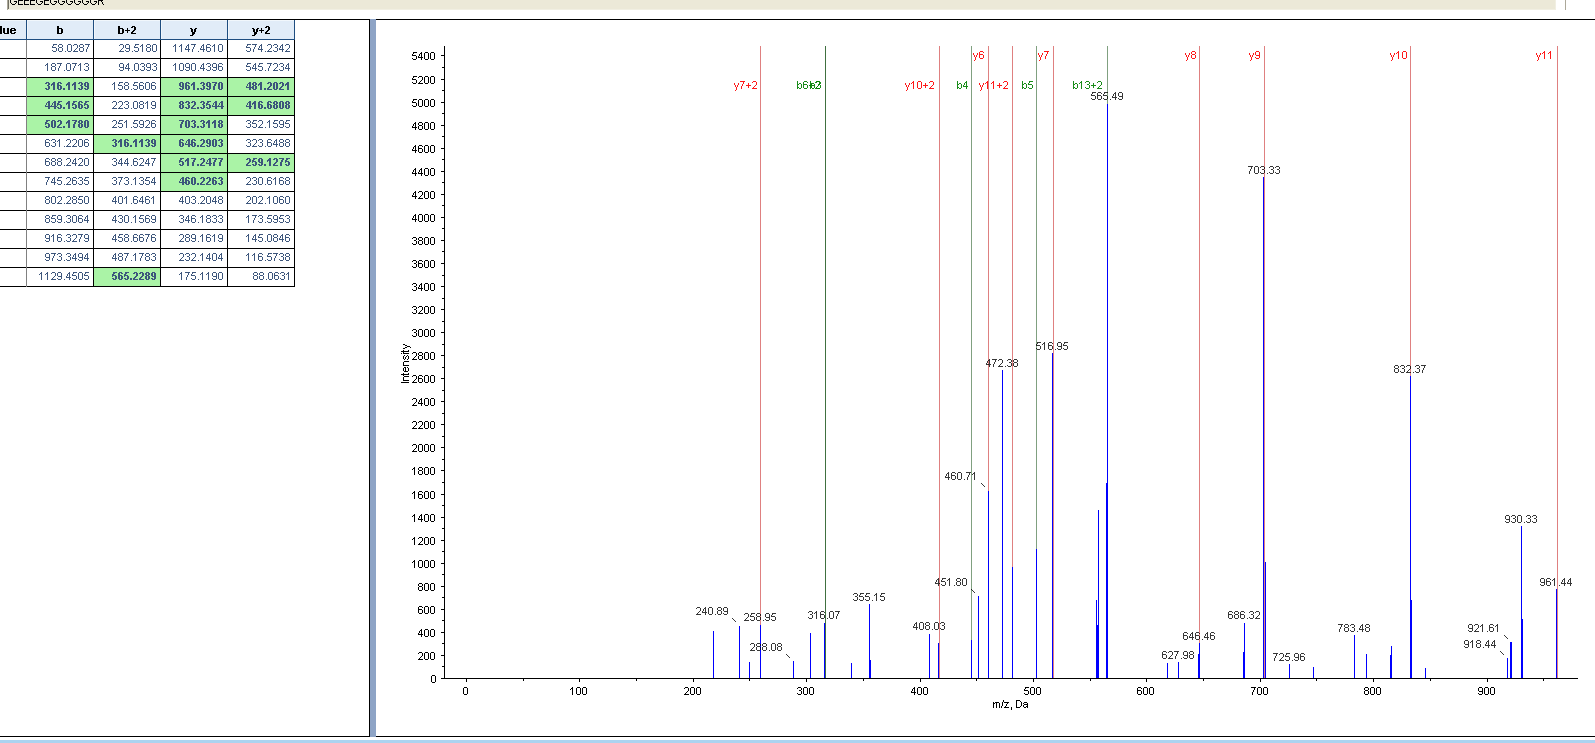

3

| Spectrum information |          |      |        |           | Identification |               | Peptide Conf |                 |                 |
|----------------------|----------|------|--------|-----------|----------------|---------------|--------------|-----------------|-----------------|
| Sample               | Fraction | Scan | Charge | Theor m/z | Δ Mass         | Sequence      | Sc           | One Step Method | Two Step Method |
| 6                    | 5        | 2617 | 2      | 574.2341  | 0.019598       | GEEEGEGGGGGGR | 9            | 84.84           | 97.48           |

Spectrum List

| Spectrum      | Time | Prec MW   | Prec m/z | Prec z | Prot N | Best Sequence | Modifications | Conf | Theor MW  | z |
|---------------|------|-----------|----------|--------|--------|---------------|---------------|------|-----------|---|
| 39.1.1.2617.1 |      | 1146.4734 | 574.2440 | 2      | 1008   | GEEEGEGGGGGGR |               | 97.5 | 1146.4537 | 2 |

Peptide ID Hypotheses - 39.1.1.2617.1

| Conf | Sc | Prot N | Sequence      | Modifications   | Theor MW  | Theor m/z | z | ΔMass   |
|------|----|--------|---------------|-----------------|-----------|-----------|---|---------|
| 97.5 | 9  | 1008   | GEEEGEGGGGGGR |                 | 1146.4537 | 574.2341  | 2 | 0.0196  |
| <1   | 4  |        | CPNEPECVQK    | Deamidated(N)@3 | 1146.4685 | 574.2416  | 2 | 0.0048  |
| <1   | 4  |        | CPSGAQECPGAK  |                 | 1146.4797 | 574.2472  | 2 | -0.0064 |
| <1   | 4  |        | QVCEPENPCK    | Deamidated(N)@7 | 1146.4685 | 574.2416  | 2 | 0.0048  |
| <1   | 3  |        | AMEQPFQFSM    |                 | 1146.4685 | 574.2416  | 2 | 0.0048  |

Precursor MS Region

No Data Showing

Fragmentation Evidence for Peptide

GEEEGEGGGGGGR

| Residue | b         | b+2      | y         | y+2      |
|---------|-----------|----------|-----------|----------|
| G       | 58.0287   | 29.5180  | 1147.4610 | 574.2342 |
| E       | 167.0713  | 94.0393  | 1090.4396 | 545.7234 |
| E       | 316.1139  | 158.5806 | 961.3970  | 481.2021 |
| E       | 445.1565  | 223.0819 | 832.3544  | 416.6808 |
| G       | 502.1780  | 251.5926 | 703.3118  | 352.1595 |
| E       | 631.2206  | 316.1139 | 646.2903  | 323.6488 |
| G       | 688.2420  | 344.6247 | 517.2477  | 259.1275 |
| G       | 745.2635  | 373.1354 | 460.2263  | 230.6168 |
| G       | 802.2850  | 401.6461 | 403.2048  | 202.1060 |
| G       | 859.3064  | 430.1569 | 346.1833  | 173.5953 |
| G       | 916.3279  | 458.6676 | 289.1619  | 145.0846 |
| G       | 973.3494  | 487.1783 | 232.1404  | 116.5738 |
| R       | 1129.4505 | 565.2289 | 175.1190  | 88.0631  |

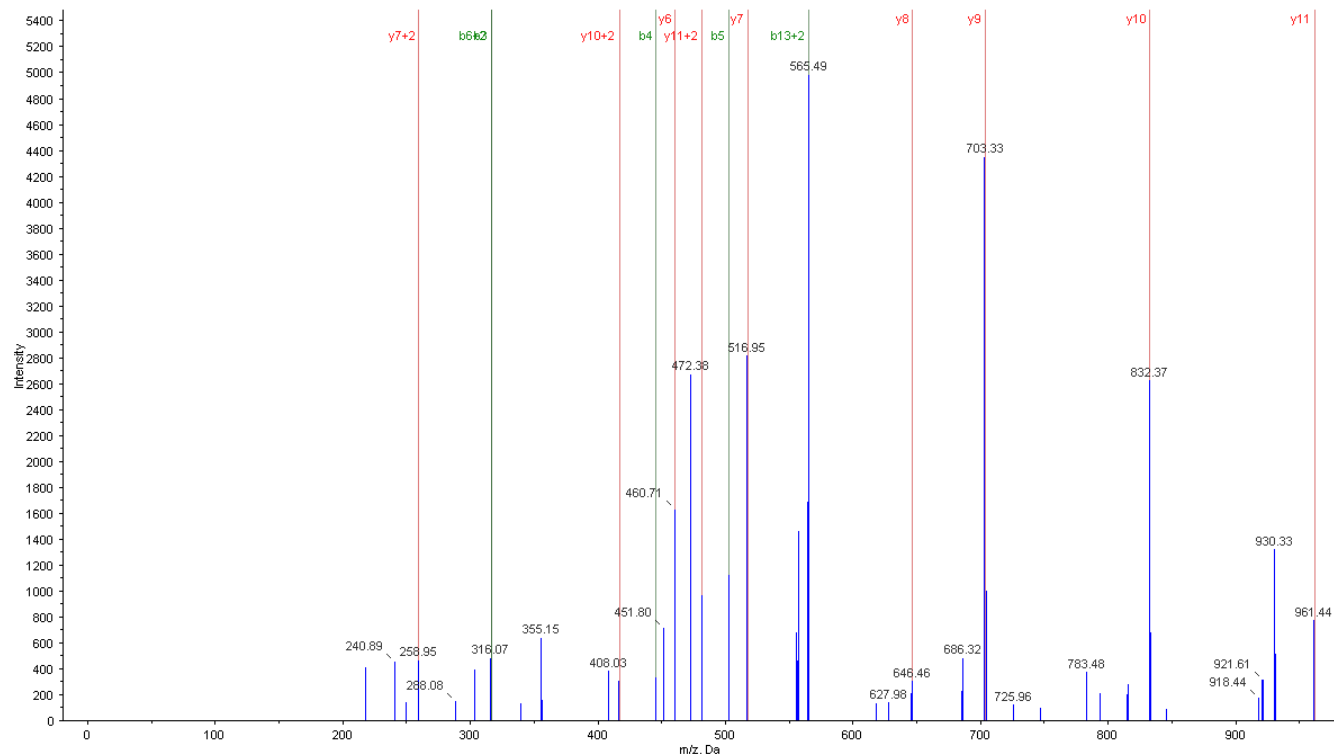

3

| Spectrum information |          |      |        |           | Identification |               |    | Peptide Conf    |                 |
|----------------------|----------|------|--------|-----------|----------------|---------------|----|-----------------|-----------------|
| Sample               | Fraction | Scan | Charge | Theor m/z | Δ Mass         | Sequence      | Sc | One Step Method | Two Step Method |
| 6                    | 5        | 2617 | 2      | 574.2341  | 0.019598       | GEEEGEGGGGGGR | 9  | 84.84           | 97.48           |

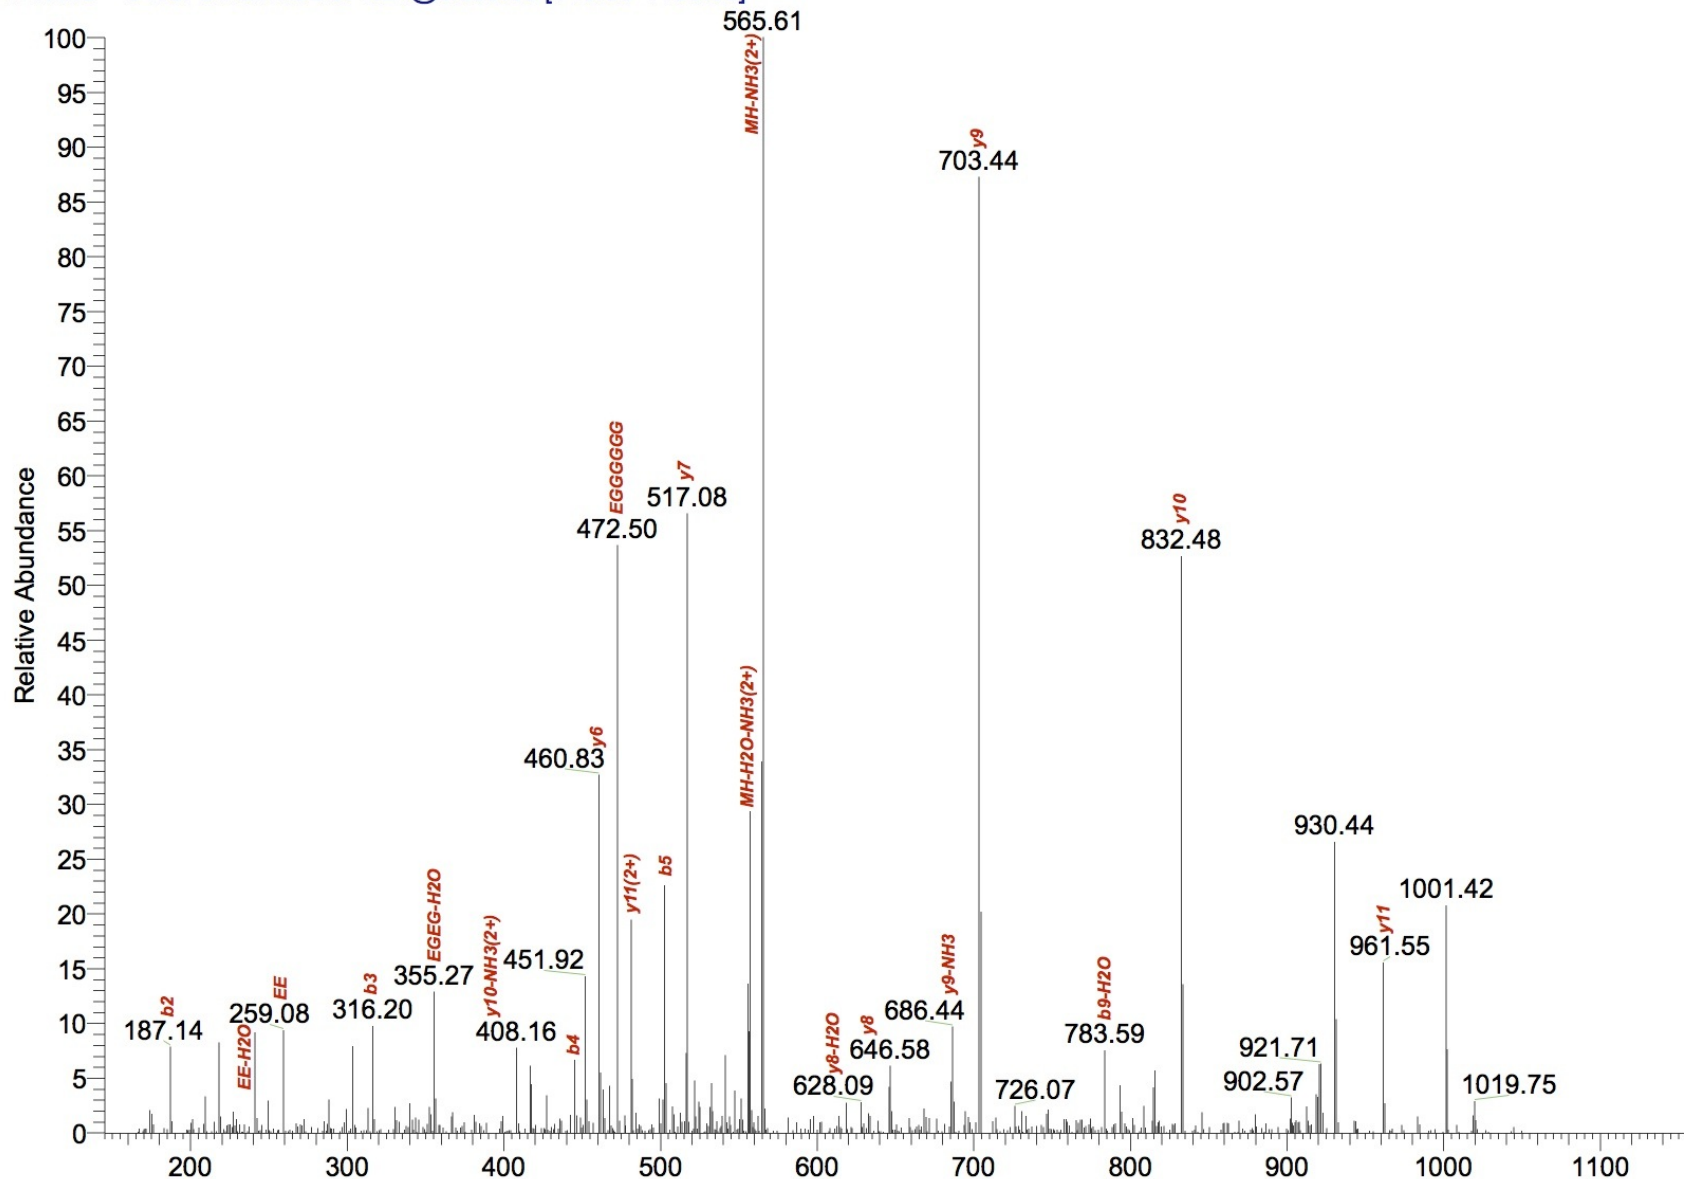

3

| Spectrum information |          |      |        |           | Identification |              |    | Peptide Conf    |                 |
|----------------------|----------|------|--------|-----------|----------------|--------------|----|-----------------|-----------------|
| Sample               | Fraction | Scan | Charge | Theor m/z | Δ Mass         | Sequence     | Sc | One Step Method | Two Step Method |
| 6                    | 5        | 2617 | 2      | 574.2341  | 0.019598       | GEEEGEGGGGGR | 9  | 84.84           | 97.48           |

**Workflow Tasks**

- Identify Proteins
- LC...
- Spot-Based (MS only)...
- Spot-Based (MS and MS/MS)...
- View
- Analysis Log...
- Result...
- Export
- Peptide Summary...
- Protein Summary...

| Protein ID           |      |           |          |        |        | Spectra       |               | Summary Statistics |      |           |   |
|----------------------|------|-----------|----------|--------|--------|---------------|---------------|--------------------|------|-----------|---|
| <b>Spectrum List</b> |      |           |          |        |        |               |               |                    |      |           |   |
| Spectrum             | Time | Prec MW   | Prec m/z | Prec z | Prot N | Best Sequence | Modifications |                    | Conf | Theor MW  | z |
| 39.1.1.3792.1        |      | 1357.6945 | 679.8545 | 2      | 1308   | RTSVCPRTWPR   |               |                    | 73.8 | 1357.7037 | 2 |

| Peptide ID Hypotheses - 39.1.1.3792.1 |    |        |                 |               |           |           |   |         |  |
|---------------------------------------|----|--------|-----------------|---------------|-----------|-----------|---|---------|--|
| Conf                                  | Sc | Prot N | Sequence        | Modifications | Theor MW  | Theor m/z | z | ΔMass   |  |
| 73.8                                  | 10 | 1308   | RTSVCPRTWPR     |               | 1357.7037 | 679.8591  | 2 | -0.0093 |  |
| <1                                    | 9  | 1630   | CGGELVLVGEGLVGR |               | 1357.7024 | 679.8565  | 2 | -0.0080 |  |
| <1                                    | 8  |        | EEVGQLSGVGGLR   |               | 1357.6990 | 679.8568  | 2 | -0.0046 |  |
| <1                                    | 7  |        | AWAETLSSPAVAR   |               | 1357.6990 | 679.8568  | 2 | -0.0046 |  |
| <1                                    | 7  |        | CLQLLASSAEPAR   |               | 1357.7024 | 679.8565  | 2 | -0.0080 |  |

**Precursor MS Region**

No Data Showing

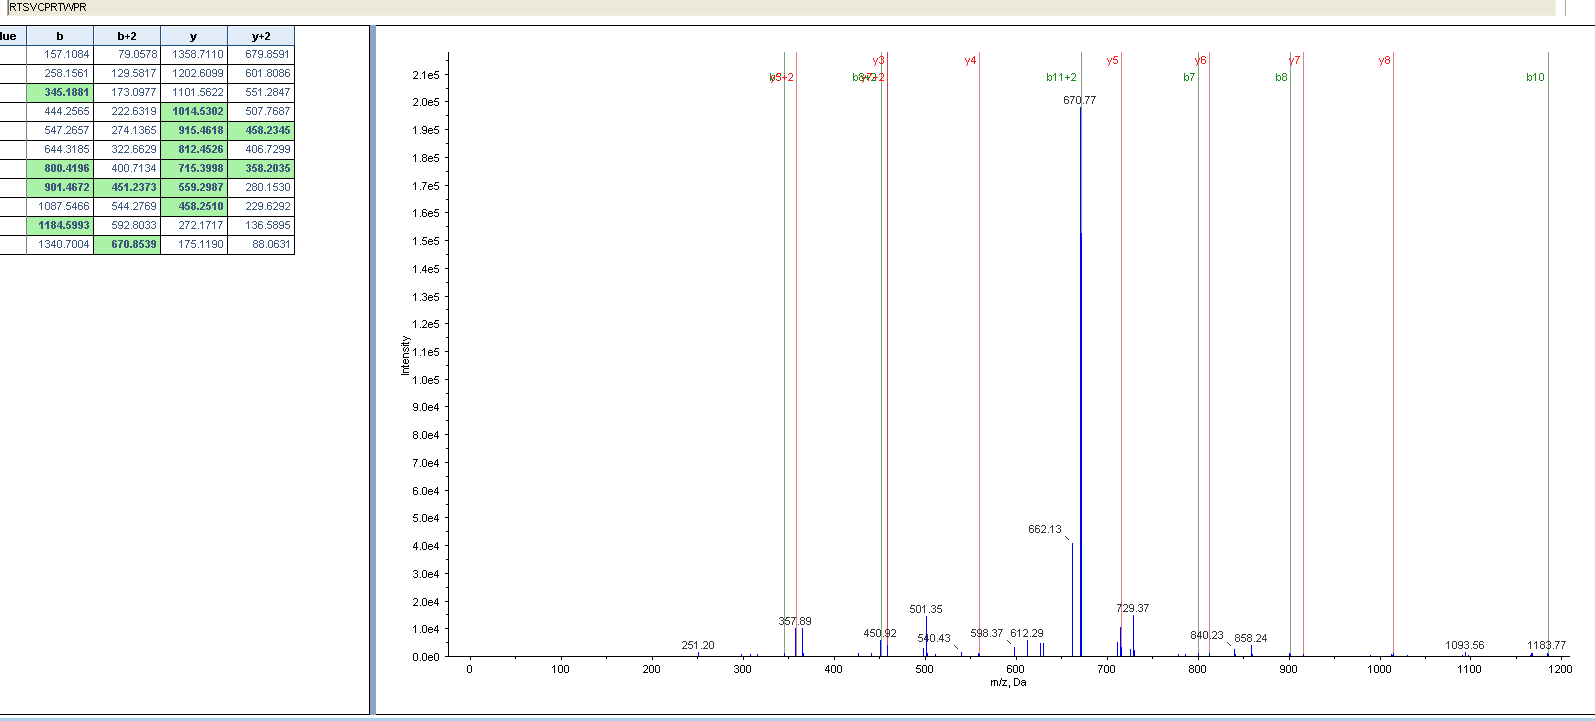

4

| Spectrum information |          |      |        |           | Identification |             |    | Peptide Conf    |                 |
|----------------------|----------|------|--------|-----------|----------------|-------------|----|-----------------|-----------------|
| Sample               | Fraction | Scan | Charge | Theor m/z | Δ Mass         | Sequence    | Sc | One Step Method | Two Step Method |
| 6                    | 5        | 3792 | 2      | 679.8591  | -0.00927       | RTSVCPRTWPR | 10 | 73.85           | 98.08           |

Spectrum List

| Spectrum      | Time | Prec MW   | Prec m/z | Prec z | Prot N | Best Sequence | Modifications | Conf | Theor MW  | z |
|---------------|------|-----------|----------|--------|--------|---------------|---------------|------|-----------|---|
| 39.1.1.3792.1 |      | 1357.6945 | 679.8545 | 2      | 928    | RTSVCPRTWPR   |               | 98.1 | 1357.7037 | 2 |

Peptide ID Hypotheses - 39.1.1.3792.1

| Conf | Sc | Prot N     | Sequence      | Modifications   | Theor MW  | Theor m/z | z | ΔMass   |
|------|----|------------|---------------|-----------------|-----------|-----------|---|---------|
| 98.1 | 10 | 928        | RTSVCPRTWPR   |                 | 1357.7037 | 679.8591  | 2 | -0.0093 |
| <1   | 7  | 7, 20, ... | QSVVEADINGLRR | Deamidated(N)@8 | 1357.6949 | 679.8548  | 2 | -0.0005 |
| <1   | 7  | 19         | QTVEADVINGLRR | Deamidated(N)@8 | 1357.6949 | 679.8548  | 2 | -0.0005 |
| <1   | 6  | 1081       | KLCLDQTPTSRPR |                 | 1357.7024 | 679.8585  | 2 | -0.0079 |
| <1   | 5  | 1196       | ACRELGGLDLPTR |                 | 1357.6772 | 679.8459  | 2 | 0.0172  |
| <1   | 7  | 1463       | QLSEDRGLR     | Deamidated(Q)@8 | 1357.7062 | 679.8604  | 2 | -0.0118 |
| <1   | 7  | 1524       | GEKREVEERLGR  |                 | 1357.6949 | 679.8548  | 2 | -0.0005 |
| <1   | 6  | 1752       | GESLQPSDSLVAR |                 | 1357.6837 | 679.8492  | 2 | 0.0107  |

Precursor MS Region

No Data Showing

Fragmentation Evidence for Peptide

RTSVCPRTWPR

| Residue | b         | b+2      | y         | y+2      |
|---------|-----------|----------|-----------|----------|
| R       | 157.1084  | 79.0578  | 1358.7110 | 679.8591 |
| T       | 258.1561  | 129.5817 | 1202.6099 | 601.8086 |
| S       | 345.1884  | 173.0977 | 1101.5622 | 551.2847 |
| V       | 444.2565  | 222.6319 | 1014.5302 | 507.7687 |
| C       | 547.2657  | 274.1365 | 915.4618  | 458.2345 |
| P       | 644.3185  | 322.6629 | 812.4526  | 406.7299 |
| R       | 806.4196  | 400.7134 | 715.3998  | 358.2035 |
| T       | 901.4672  | 451.2373 | 559.2987  | 280.1530 |
| WV      | 1067.5466 | 544.2769 | 458.2510  | 229.6292 |
| P       | 1184.5993 | 592.8033 | 272.1717  | 136.5895 |
| R       | 1340.7004 | 670.8539 | 175.1190  | 88.0631  |

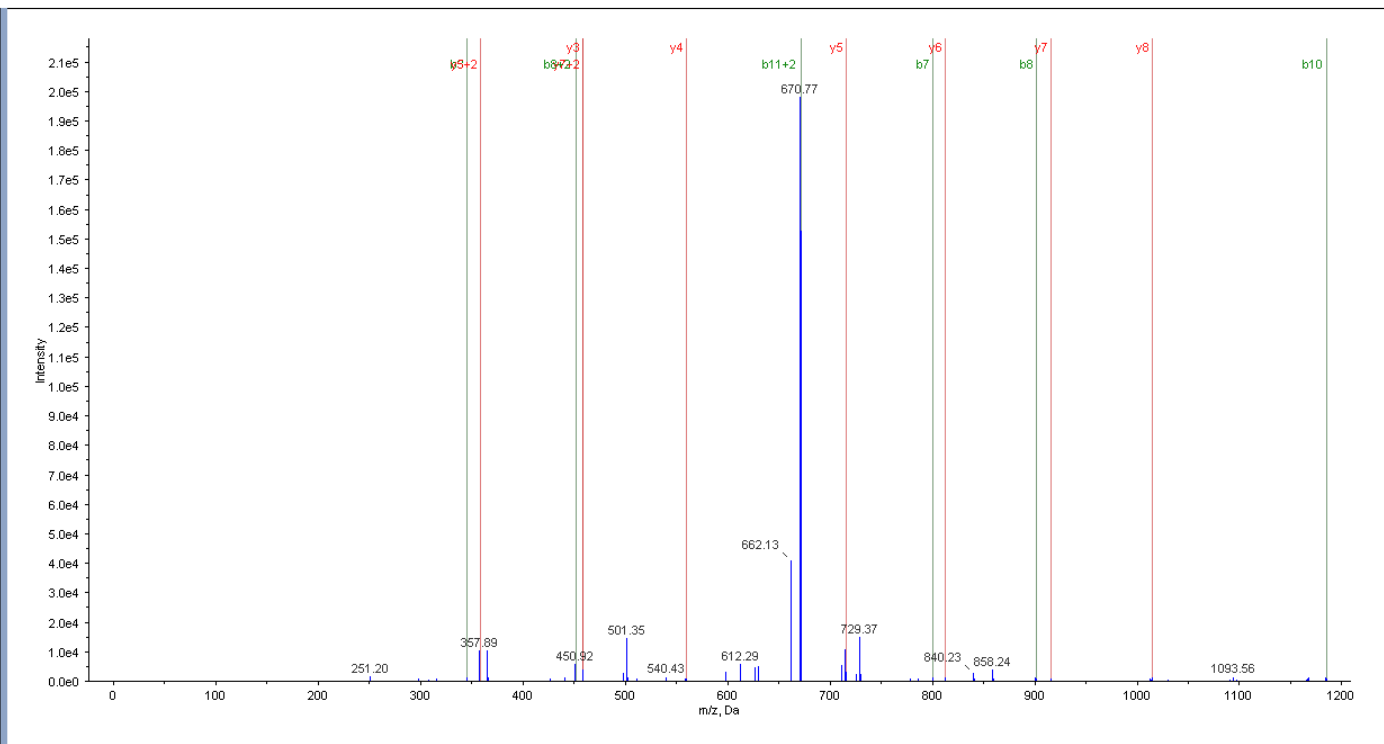

4

| Spectrum information |          |      |        |           | Identification |             |    | Peptide Conf    |                 |
|----------------------|----------|------|--------|-----------|----------------|-------------|----|-----------------|-----------------|
| Sample               | Fraction | Scan | Charge | Theor m/z | Δ Mass         | Sequence    | Sc | One Step Method | Two Step Method |
| 6                    | 5        | 3792 | 2      | 679.8591  | -0.00927       | RTSVCPRTWPR | 10 | 73.85           | 98.08           |

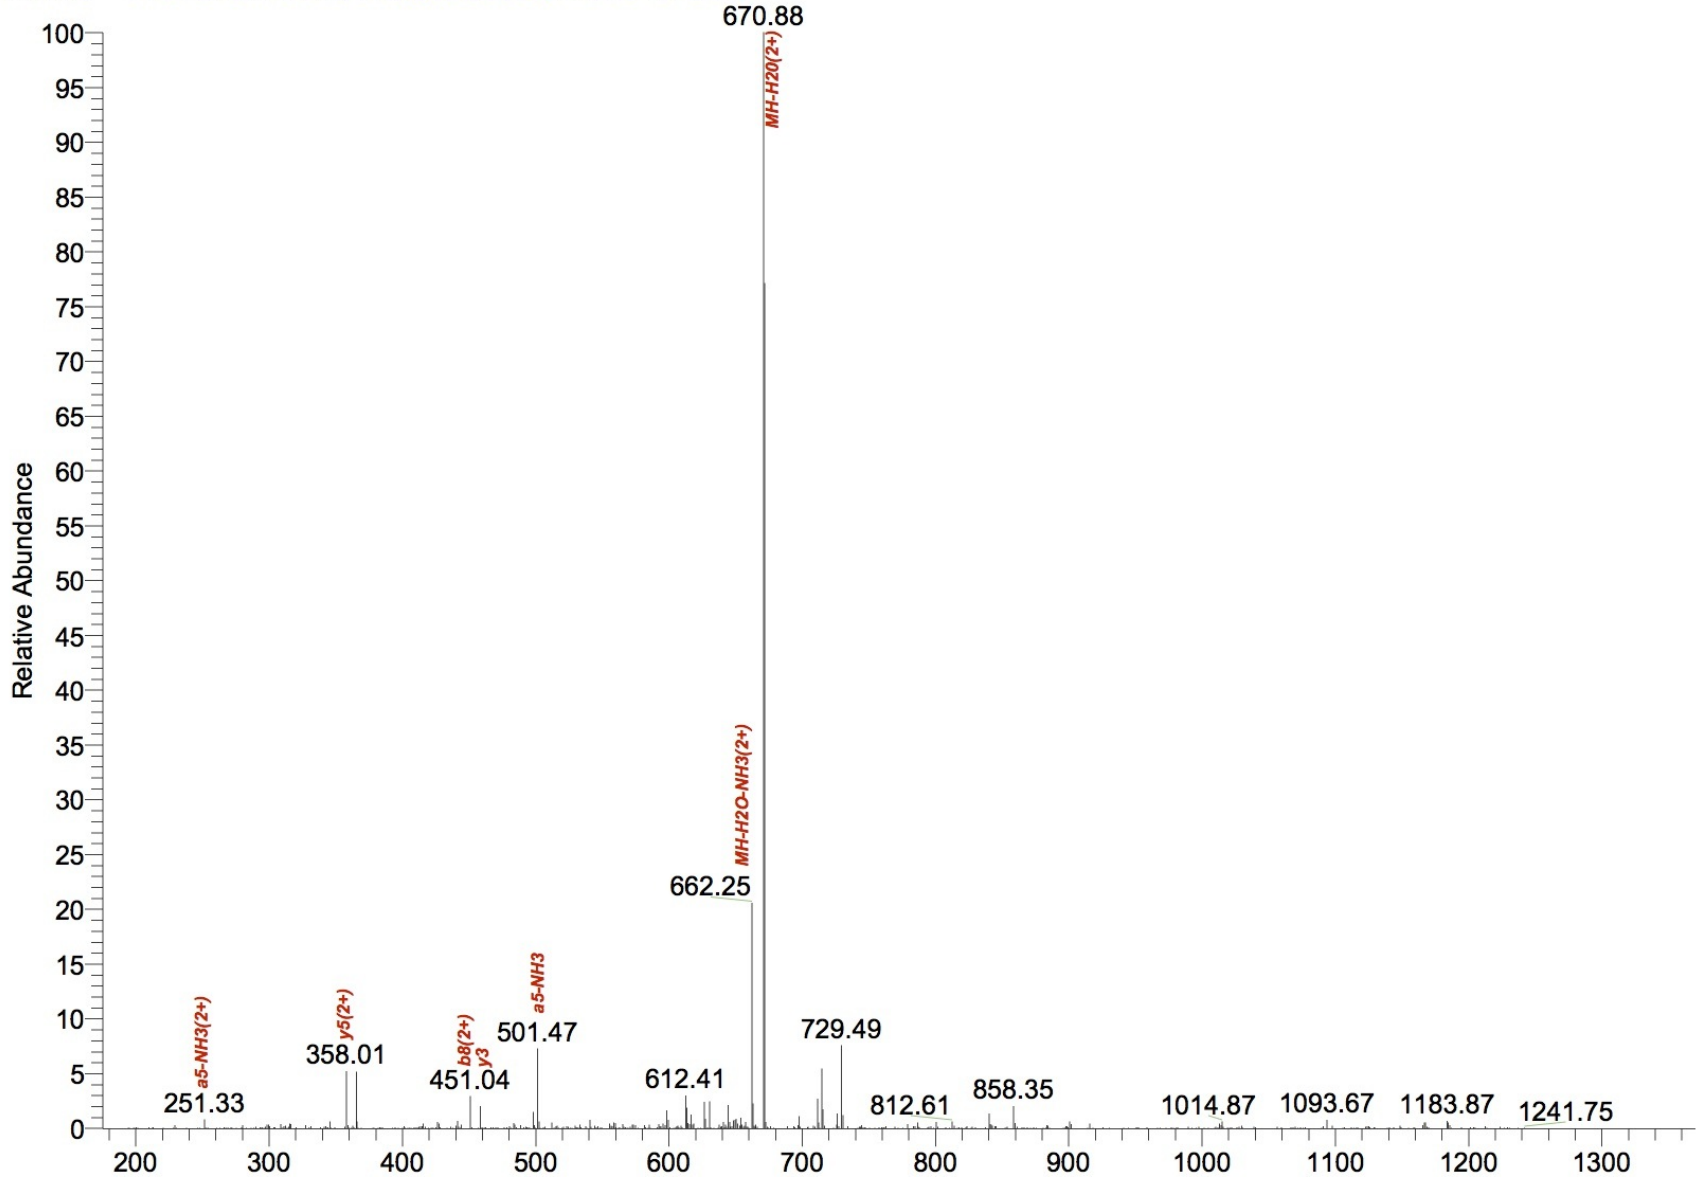

4

| Spectrum information |          |      |        |           | Identification |            |    | Peptide Conf    |                 |
|----------------------|----------|------|--------|-----------|----------------|------------|----|-----------------|-----------------|
| Sample               | Fraction | Scan | Charge | Theor m/z | Δ Mass         | Sequence   | Sc | One Step Method | Two Step Method |
| 6                    | 5        | 3792 | 2      | 679.8591  | -0.00927       | RTSVCPTWPR | 10 | 73.85           | 98.08           |



## Metaproteomics (Identified in one-step but not by two-step method)

| Spectrum      | One Step Method   | Conf | Sc | Two Step Method       | Conf | Sc | Reason why it was not identified in two step method      |
|---------------|-------------------|------|----|-----------------------|------|----|----------------------------------------------------------|
| 18.1.1.3933.1 | NNEDEIAGK         | 97.6 | 11 | DLTEQQQK              | 17.3 | 8  | Protein present in second step database. Reason unknown. |
| 19.1.1.2087.1 | AEAPAAPAQEAPK     | 99   | 13 | HPFQPWVNPk            | 6.0  | 1  | Protein present in second step database. Reason unknown. |
| 19.1.1.6769.1 | IALTPVAIAAGR      | 99   | 13 | ALLTPVAIAAGR          | 99.0 | 13 | Not detected in the first step.                          |
| 19.1.1.7363.1 | VQIVGDDLfVTNPER   | 97.4 | 13 | VQLVGDDLfVTNPER       | 99.0 | 13 | Not detected in the first step.                          |
| 19.1.1.7502.1 | GDMGIEVPFEMVPVYQK | 99   | 16 | QT<br>ANLHAEPDYLEVLEQ | 8.0  | 1  | Protein present in second step database. Reason unknown. |
| 19.1.1.8053.1 | VAQEEIFGPVATVIK   | 96.4 | 12 | VQLYGPTNVAPIISK       | 12.4 | 8  | Protein present in second step database. Reason unknown. |
| 33.1.1.4545.1 | ASGEVPLDVAPQK     | 99   | 15 | AKDNAVMSTRFK          | 76.5 | 9  | Protein present in second step database. Reason unknown. |

- Workflow Tasks
- Identify Proteins
- LC...
- Spot-Based (MS only)...
- Spot-Based (MS and MS/MS)...
- View
- Analysis Log...
- Result...
- Export
- Peptide Summary...
- Protein Summary...
- MGF Peaklist(s)...

Spectrum List

| Spectrum      | Time | Prec MW | Prec m/z | Prec z | Prot N | Best Sequence | Modifications | Conf | Theor MW | z |
|---------------|------|---------|----------|--------|--------|---------------|---------------|------|----------|---|
| 18.1.1.3933.1 |      | 0.0000  | 495.2484 | 0      | 924    | NNEDEIAGK     |               | 97.6 | 986.4462 | 2 |

Peptide ID Hypotheses - 18.1.1.3933.1

| Conf | Sc | Prot N | Sequence  | Modifications | Theor MW | Theor m/z | z | ΔMass   |
|------|----|--------|-----------|---------------|----------|-----------|---|---------|
| 97.6 | 11 | 924    | NNEDEIAGK |               | 986.4462 | 495.2303  | 2 | 0.0361  |
| <1   | 10 |        | DIEDELKK  |               | 988.5077 | 495.2611  | 2 | -0.0254 |
| <1   | 10 |        | DLEDEIQK  |               | 988.4713 | 495.2429  | 2 | 0.0110  |
| <1   | 10 |        | DLEDEIQK  |               | 988.4713 | 495.2429  | 2 | 0.0110  |
| <1   | 10 |        | DLEEDIAGK |               | 988.4713 | 495.2429  | 2 | 0.0110  |

Precursor MS Region

No Data Showing

Fragmentation Evidence for Peptide

NNEDEIAGK

| Residue | b        | b+2      | y        | y+2      |
|---------|----------|----------|----------|----------|
| N       | 115.0502 | 58.0287  | 989.4534 | 495.2304 |
| N       | 229.0931 | 115.0502 | 875.4105 | 438.2089 |
| E       | 358.1357 | 179.5715 | 761.3676 | 381.1874 |
| D       | 473.1627 | 237.0850 | 632.3259 | 316.6661 |
| E       | 602.2053 | 301.6063 | 517.2980 | 259.1527 |
| I       | 715.2893 | 358.1483 | 388.2554 | 194.6314 |
| A       | 786.3264 | 393.6669 | 275.1714 | 138.0893 |
| G       | 843.3479 | 422.1776 | 204.1343 | 102.5708 |
| K       | 971.4429 | 486.2251 | 147.1128 | 74.0600  |

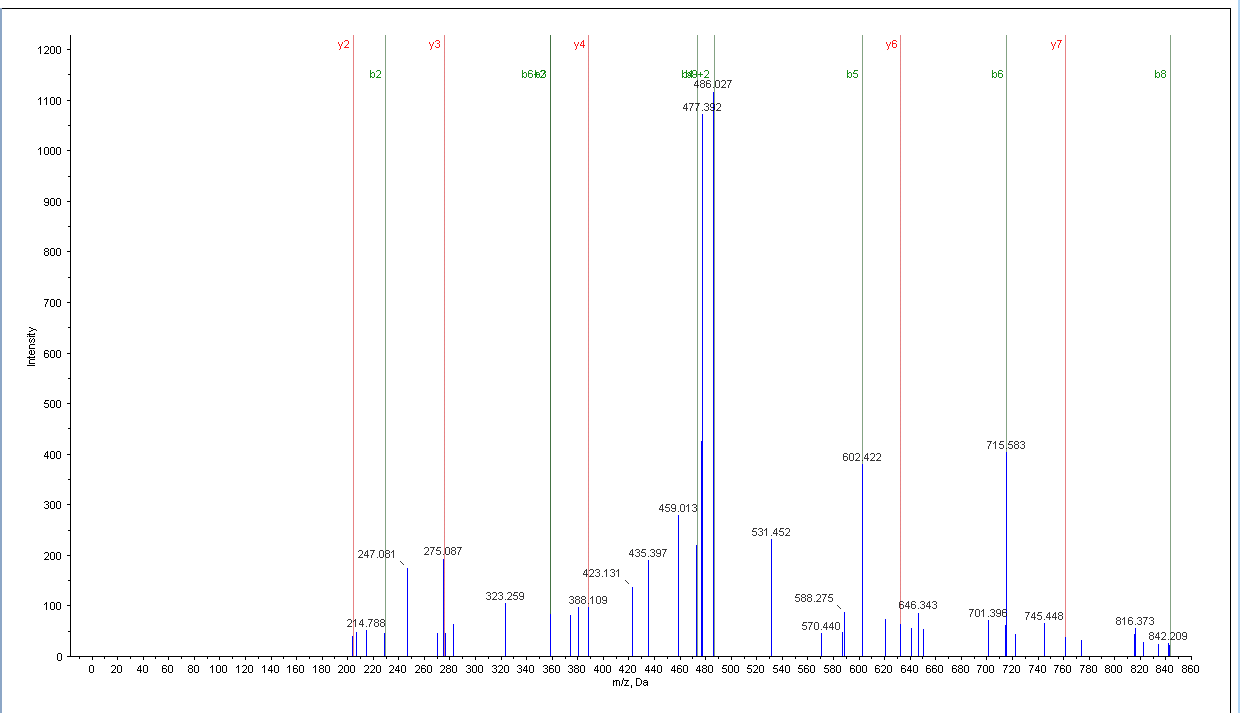

| Spectrum      | One Step Method | Conf | Sc |
|---------------|-----------------|------|----|
| 18.1.1.3933.1 | NNEDEIAGK       | 97.6 | 11 |

| Protein ID                   |  |  |  |  |  |  |  |  |  | Spectra |  |  |  |  |  |  |  |  |  | Summary Statistics |  |  |  |  |  |  |  |  |  |
|------------------------------|--|--|--|--|--|--|--|--|--|---------|--|--|--|--|--|--|--|--|--|--------------------|--|--|--|--|--|--|--|--|--|
| <b>Workflow Tasks</b>        |  |  |  |  |  |  |  |  |  |         |  |  |  |  |  |  |  |  |  |                    |  |  |  |  |  |  |  |  |  |
| <b>Identify Proteins</b>     |  |  |  |  |  |  |  |  |  |         |  |  |  |  |  |  |  |  |  |                    |  |  |  |  |  |  |  |  |  |
| LC...                        |  |  |  |  |  |  |  |  |  |         |  |  |  |  |  |  |  |  |  |                    |  |  |  |  |  |  |  |  |  |
| Spot-Based (MS only)...      |  |  |  |  |  |  |  |  |  |         |  |  |  |  |  |  |  |  |  |                    |  |  |  |  |  |  |  |  |  |
| Spot-Based (MS and MS/MS)... |  |  |  |  |  |  |  |  |  |         |  |  |  |  |  |  |  |  |  |                    |  |  |  |  |  |  |  |  |  |
| <b>View</b>                  |  |  |  |  |  |  |  |  |  |         |  |  |  |  |  |  |  |  |  |                    |  |  |  |  |  |  |  |  |  |
| Analysis Log...              |  |  |  |  |  |  |  |  |  |         |  |  |  |  |  |  |  |  |  |                    |  |  |  |  |  |  |  |  |  |
| Result...                    |  |  |  |  |  |  |  |  |  |         |  |  |  |  |  |  |  |  |  |                    |  |  |  |  |  |  |  |  |  |
| <b>Export</b>                |  |  |  |  |  |  |  |  |  |         |  |  |  |  |  |  |  |  |  |                    |  |  |  |  |  |  |  |  |  |
| Peptide Summary...           |  |  |  |  |  |  |  |  |  |         |  |  |  |  |  |  |  |  |  |                    |  |  |  |  |  |  |  |  |  |
| Protein Summary...           |  |  |  |  |  |  |  |  |  |         |  |  |  |  |  |  |  |  |  |                    |  |  |  |  |  |  |  |  |  |
| MGF Peaklist(s)...           |  |  |  |  |  |  |  |  |  |         |  |  |  |  |  |  |  |  |  |                    |  |  |  |  |  |  |  |  |  |

  

| Spectrum      | Time | Prec MW | Prec m/z | Prec z | Prot N | Best Sequence | Modifications | Conf | Theor MW | z |
|---------------|------|---------|----------|--------|--------|---------------|---------------|------|----------|---|
| 18.1.1.3933.1 |      | 0.0000  | 495.2485 | 0      |        | DLTEQQQK      |               | 17.3 | 988.4825 | 2 |

  

| Peptide ID Hypotheses - 18.1.1.3933.1 |    |        |           |                 |          |           |   |        |  |
|---------------------------------------|----|--------|-----------|-----------------|----------|-----------|---|--------|--|
| Conf                                  | Sc | Prot N | Sequence  | Modifications   | Theor MW | Theor m/z | z | ΔMass  |  |
| 17.3                                  | 8  |        | DLTEQQQK  |                 | 988.4825 | 495.2485  | 2 | 0.0022 |  |
| 14.2                                  | 8  | 842    | ENSAEAIQK |                 | 988.4825 | 495.2485  | 2 | 0.0022 |  |
| 14.2                                  | 8  |        | VDELAATR  |                 | 988.4825 | 495.2485  | 2 | 0.0022 |  |
| 5                                     | 8  |        | NLENIEEK  | Deamidated(N)@1 | 988.4713 | 495.2429  | 2 | 0.0134 |  |
| 4.9                                   | 7  |        | ETLQDQK   |                 | 988.4825 | 495.2485  | 2 | 0.0022 |  |
| <1                                    | 7  | 156    | MEINELTR  | Deamidated(N)@1 | 988.4825 | 495.2485  | 2 | 0.0022 |  |

  

| Precursor MS Region |  |  |  |  |
|---------------------|--|--|--|--|
| No Data Showing     |  |  |  |  |

**Fragmentation Evidence for Peptide**

DLTEQQQK

| Residue | b        | b+2      | y        | y+2      |
|---------|----------|----------|----------|----------|
| D       | 116.0342 | 58.5207  | 989.4898 | 495.2485 |
| L       | 229.1183 | 115.0628 | 874.4629 | 437.7351 |
| T       | 330.1660 | 165.5866 | 761.3788 | 381.1930 |
| E       | 459.2086 | 230.1079 | 660.3311 | 330.6692 |
| Q       | 587.2671 | 294.1372 | 531.2885 | 266.1479 |
| Q       | 715.3257 | 358.1665 | 403.2300 | 202.1186 |
| Q       | 843.3843 | 422.1958 | 275.1714 | 138.0893 |
| K       | 971.4793 | 486.2433 | 147.1128 | 74.0600  |

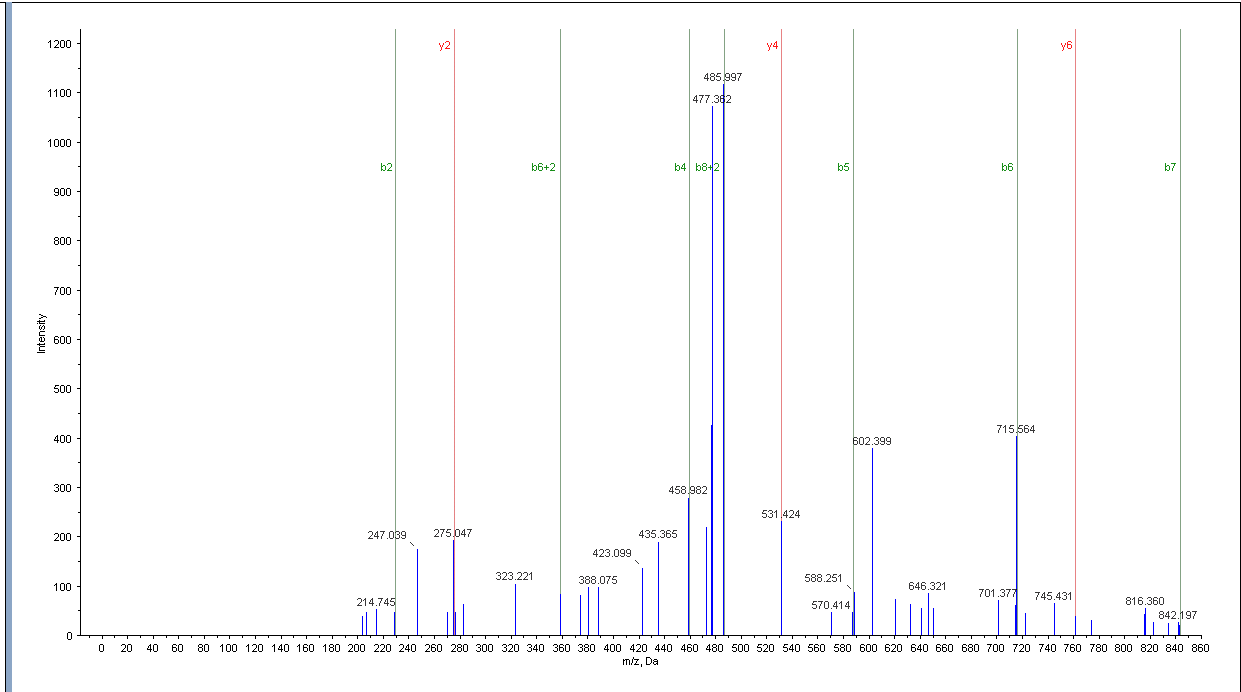

| Spectrum      | Two Step Method | Conf | Sc |
|---------------|-----------------|------|----|
| 18.1.1.3933.1 | DLTEQQQK        | 17.3 | 8  |

**Workflow Tasks**

- Identify Proteins
- LC...
- Spot-Based (MS only)...
- Spot-Based (MS and MS/MS)...
- View
- Analysis Log...
- Result...
- Export
- Peptide Summary...
- Protein Summary...
- MGF Peaklist(s)...

| Protein ID           |      |           |          |        |        | Spectra       |               |      |           | Summary Statistics |  |
|----------------------|------|-----------|----------|--------|--------|---------------|---------------|------|-----------|--------------------|--|
| <b>Spectrum List</b> |      |           |          |        |        |               |               |      |           |                    |  |
| Spectrum             | Time | Prec MW   | Prec m/z | Prec z | Prot N | Best Sequence | Modifications | Conf | Theor MW  | z                  |  |
| 19.1.1.2087.1        |      | 1249.6300 | 625.8223 | 2      | 810    | AEAPAAPAQEAPK |               | 99   | 1249.6302 | 2                  |  |

**Peptide ID Hypotheses - 19.1.1.2087.1**

| Conf | Sc | Prot N | Sequence      | Modifications   | Theor MW  | Theor m/z | z | ΔMass   |
|------|----|--------|---------------|-----------------|-----------|-----------|---|---------|
| 99   | 13 | 810    | AEAPAAPAQEAPK |                 | 1249.6302 | 625.8224  | 2 | -0.0002 |
| <1   | 7  |        | QD IYDQ IKAR  | Deamidated(O)@5 | 1249.6302 | 625.8224  | 2 | -0.0002 |
| <1   | 7  |        | QD QP IRHEVK  | Deamidated(O)@3 | 1249.6415 | 625.8280  | 2 | -0.0115 |
| <1   | 6  |        | AEHRFLQAR     |                 | 1249.6238 | 625.8192  | 2 | 0.0063  |
| <1   | 6  |        | AGDEGRYIKMK   |                 | 1249.6415 | 625.8280  | 2 | -0.0115 |

**Precursor MS Region**

No Data Showing

**Fragmentation Evidence for Peptide**

AEAPAAPAQEAPK

| Residue | b         | b+2      | y         | y+2      |
|---------|-----------|----------|-----------|----------|
| A       | 72.0444   | 36.5258  | 1250.6375 | 625.8224 |
| E       | 201.0870  | 101.0471 | 1179.6004 | 590.3039 |
| A       | 272.1241  | 136.5657 | 1050.5578 | 525.7826 |
| P       | 369.1769  | 185.0921 | 979.5207  | 490.2640 |
| A       | 440.2140  | 220.6106 | 882.4680  | 441.7376 |
| A       | 511.2511  | 256.1292 | 811.4308  | 406.2191 |
| P       | 608.3039  | 304.6556 | 740.3937  | 370.7005 |
| A       | 679.3410  | 340.1741 | 643.3410  | 322.1741 |
| Q       | 807.3995  | 404.2034 | 572.3039  | 286.6556 |
| E       | 936.4421  | 468.2247 | 444.2453  | 222.6263 |
| A       | 1007.4793 | 504.2433 | 315.2027  | 158.1050 |
| P       | 1104.5320 | 552.7696 | 244.1656  | 122.5864 |
| K       | 1232.6270 | 616.8171 | 147.1128  | 74.0600  |

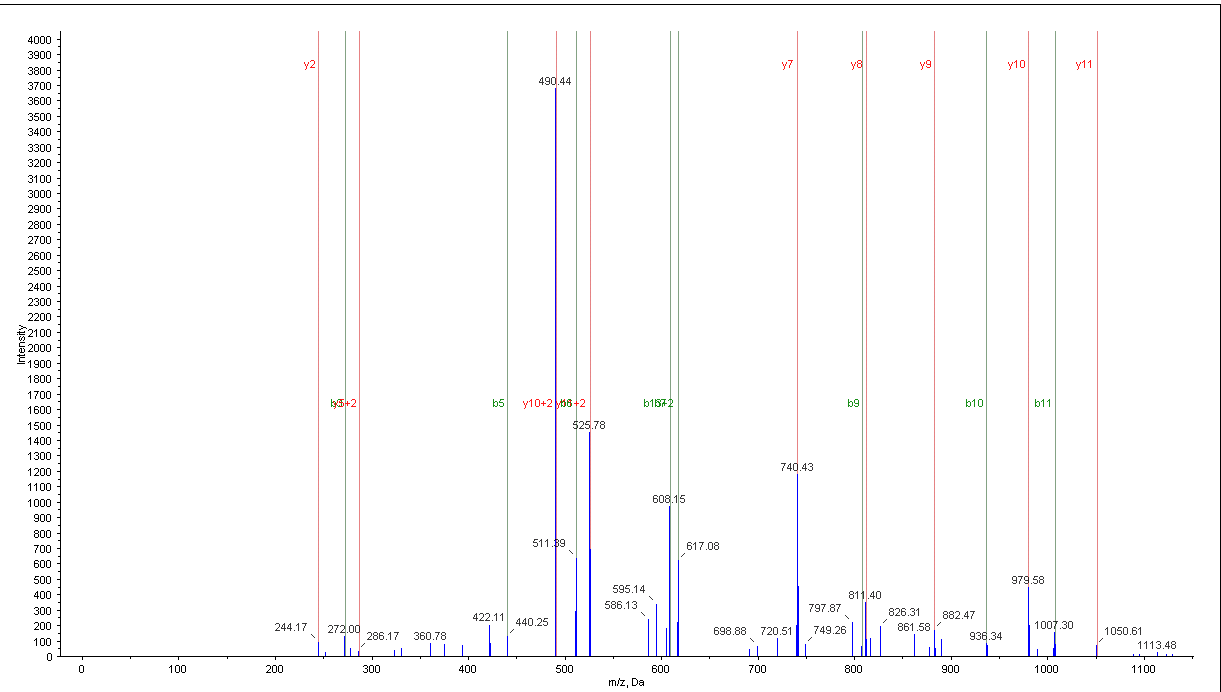

| Spectrum      | One Step Method | Conf | Sc |
|---------------|-----------------|------|----|
| 19.1.1.2087.1 | AEAPAAPAQEAPK   | 99   | 13 |

**Workflow Tasks**

- Identify Proteins
- LC...
- Spot-Based (MS only)...
- Spot-Based (MS and MS/MS)...
- View
- Analysis Log...
- Result...
- Export
- Peptide Summary...
- Protein Summary...
- MGF Peaklist(s)...

**Spectrum List**

| Spectrum      | Time | Prec MW   | Prec m/z | Prec z | Prot N | Best Sequence | Modifications   | Conf | Theor MW  | z |
|---------------|------|-----------|----------|--------|--------|---------------|-----------------|------|-----------|---|
| 19.1.1.2087.1 |      | 1249.6300 | 625.8223 | 2      |        | HPFQPWVNP     | Deamidated(O)@4 | <1   | 1249.6244 | 2 |

**Peptide ID Hypotheses - 19.1.1.2087.1**

| Conf | Sc | Prot N | Sequence     | Modifications   | Theor MW  | Theor m/z | z | ΔMass   |
|------|----|--------|--------------|-----------------|-----------|-----------|---|---------|
| <1   | 6  |        | HPFQPWVNP    | Deamidated(O)@4 | 1249.6244 | 625.8195  | 2 | 0.0056  |
| <1   | 6  |        | KSPANEFAFPR  |                 | 1249.6415 | 625.8280  | 2 | -0.0115 |
| <1   | 5  |        | HRETLDPSAFK  |                 | 1249.6415 | 625.8280  | 2 | -0.0115 |
| <1   | 5  |        | KGECLSRSGAAR |                 | 1249.6198 | 625.8171  | 2 | 0.0103  |
| <1   | 4  |        | EFNYVSHAKR   |                 | 1249.6204 | 625.8174  | 2 | 0.0096  |

**Precursor MS Region**

No Data Showing

**Fragmentation Evidence for Peptide**

HPFQ[Dea]PWWNP

| Residue | b         | b+2      | y         | y+2      |
|---------|-----------|----------|-----------|----------|
| H       | 138.0662  | 69.5367  | 1250.6317 | 625.8195 |
| P       | 235.1190  | 118.0631 | 1113.5728 | 557.2900 |
| F       | 382.1874  | 191.5973 | 1016.5200 | 508.7636 |
| Q[Dea]  | 511.2300  | 256.1186 | 869.4516  | 435.2294 |
| P       | 608.2827  | 304.6450 | 740.4090  | 370.7081 |
| W       | 794.3620  | 397.6847 | 643.3562  | 322.1817 |
| V       | 893.4304  | 447.2189 | 457.2769  | 229.1421 |
| N       | 1007.4734 | 504.2403 | 358.2085  | 179.6079 |
| P       | 1104.5261 | 552.7667 | 244.1656  | 122.5864 |
| K       | 1232.6211 | 616.8142 | 147.1128  | 74.0600  |

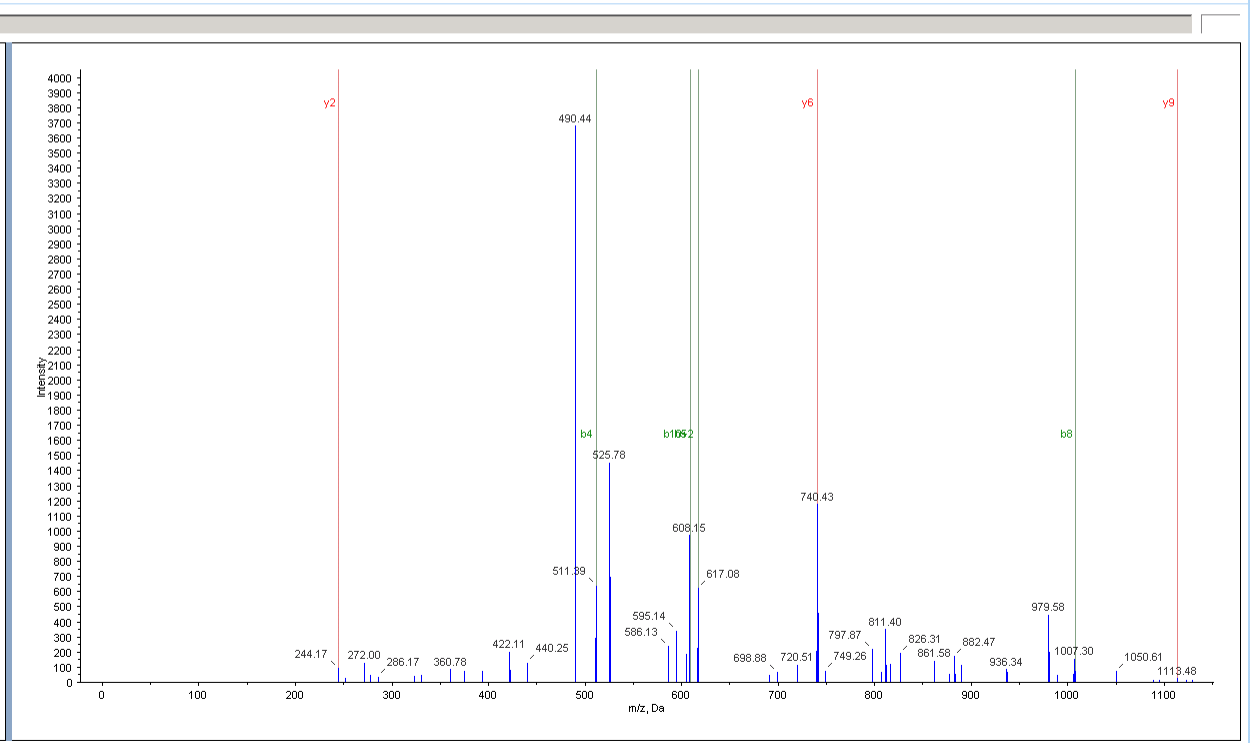

| Spectrum      | Two Step Method | Conf | Sc |
|---------------|-----------------|------|----|
| 19.1.1.2087.1 | HPFQPWVNP       | 6.0  | 1  |

**Workflow Tasks**

- Identify Proteins
- LC...
- Spot-Based (MS only)...
- Spot-Based (MS and MS/MS)...
- View
- Analysis Log...
- Result...
- Export
- Peptide Summary...
- Protein Summary...
- MGF Peaklist(s)...

Protein ID

Spectra

Summary Statistics

Spectrum List

| Spectrum      | Time | Prec MW   | Prec m/z | Prec z | Prot N | Best Sequence | Modifications | Conf | Theor MW  | z |
|---------------|------|-----------|----------|--------|--------|---------------|---------------|------|-----------|---|
| 19.1.1.6769.1 |      | 1151.7028 | 576.8587 | 2      | 774    | IALTPVAIAAGR  |               | 99   | 1151.7026 | 2 |

Peptide ID Hypotheses - 19.1.1.6769.1

| Conf | Sc | Prot N | Sequence     | Modifications | Theor MW  | Theor m/z | z | ΔMass   |
|------|----|--------|--------------|---------------|-----------|-----------|---|---------|
| 99   | 13 | 774    | IALTPVAIAAGR |               | 1151.7026 | 576.8586  | 2 | 0.0001  |
| 99   | 13 |        | ALLTPVAIAAGR |               | 1151.7026 | 576.8586  | 2 | 0.0001  |
| <1   | 7  |        | ALIRLDPAK    |               | 1151.7139 | 576.8642  | 2 | -0.0111 |
| <1   | 7  |        | LRQFPAAGR    |               | 1151.7000 | 576.8572  | 2 | 0.0028  |
| <1   | 6  |        | ALIVGGTRPIR  |               | 1151.7139 | 576.8642  | 2 | -0.0111 |

Precursor MS Region

No Data Showing

Fragmentation Evidence for Peptide

IALTPVAIAAGR

| Residue | b         | b+2      | y         | y+2      |
|---------|-----------|----------|-----------|----------|
| I       | 114.0913  | 57.5493  | 1152.7099 | 576.8586 |
| A       | 185.1265  | 93.0679  | 1039.6259 | 520.3166 |
| L       | 298.2125  | 149.6099 | 968.5887  | 484.7990 |
| T       | 399.2682  | 200.1337 | 855.5047  | 428.2560 |
| P       | 496.3130  | 248.6601 | 754.4570  | 377.7321 |
| V       | 595.3814  | 298.1943 | 657.4042  | 329.2058 |
| A       | 686.4185  | 333.7129 | 568.3358  | 279.6715 |
| I       | 779.5026  | 390.2549 | 487.2967  | 244.1530 |
| A       | 858.5397  | 425.7735 | 374.2146  | 187.6110 |
| A       | 921.5768  | 461.2920 | 303.1775  | 152.0924 |
| G       | 978.5982  | 489.8028 | 232.1404  | 116.5738 |
| R       | 1134.6994 | 567.8533 | 175.1190  | 88.0631  |

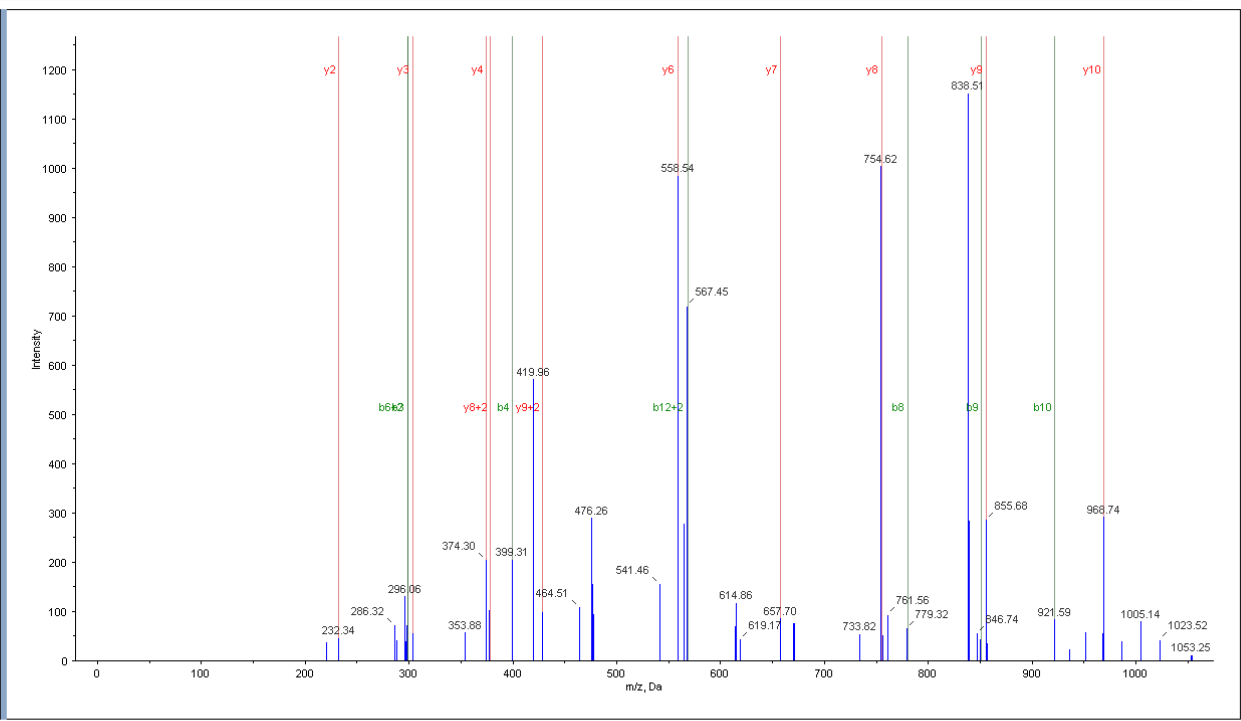

| Spectrum      | One Step Method | Conf | Sc |
|---------------|-----------------|------|----|
| 19.1.1.6769.1 | IALTPVAIAAGR    | 99   | 13 |

**Workflow Tasks**

Identify Proteins

LC...

Spot-Based (MS only)...

Spot-Based (MS and MS/MS)...

View

Analysis Log...

Result...

Export

Peptide Summary...

Protein Summary...

MGF Peaklist(s)...

| Protein ID           |      | Spectra   |          |        |        | Summary Statistics |               |      |           |   |
|----------------------|------|-----------|----------|--------|--------|--------------------|---------------|------|-----------|---|
| <b>Spectrum List</b> |      |           |          |        |        |                    |               |      |           |   |
| Spectrum             | Time | Prec MW   | Prec m/z | Prec z | Prot N | Best Sequence      | Modifications | Conf | Theor MW  | z |
| 19.1.1.6769.1        |      | 1151.7028 | 576.8537 | 2      | 875    | ALLTPVAIAAGR       |               | 99   | 1151.7026 | 2 |

**Peptide ID Hypotheses - 19.1.1.6769.1**

| Conf | Sc | Prot N | Sequence     | Modifications | Theor MW  | Theor m/z | z | ΔMass   |
|------|----|--------|--------------|---------------|-----------|-----------|---|---------|
| 99   | 13 | 875    | ALLTPVAIAAGR |               | 1151.7026 | 576.8536  | 2 | 0.0001  |
| <1   | 5  |        | KRPRLQAQR    |               | 1151.7000 | 576.8572  | 2 | 0.0028  |
| <1   | 5  |        | QAPKIAQIKR   |               | 1151.7139 | 576.8642  | 2 | -0.0111 |
| <1   | 4  |        | ALIGNILATGLP |               | 1151.6914 | 576.8530  | 2 | 0.0113  |
| <1   | 4  |        | LKAVNGPVAKR  |               | 1151.7139 | 576.8642  | 2 | -0.0111 |

**Precursor MS Region**

No Data Showing

**Fragmentation Evidence for Peptide**

ALLTPVAIAAGR

| Residue | b         | b+2      | y         | y+2      |
|---------|-----------|----------|-----------|----------|
| A       | 72.0444   | 96.5258  | 1152.7099 | 576.8596 |
| L       | 185.1285  | 93.0679  | 1081.6728 | 541.3488 |
| L       | 298.2125  | 149.6099 | 968.5887  | 484.7960 |
| T       | 399.2602  | 200.1337 | 855.5047  | 428.2568 |
| P       | 496.3130  | 248.6801 | 754.4678  | 377.7321 |
| V       | 595.3814  | 298.1943 | 657.4042  | 329.2058 |
| A       | 666.4185  | 333.7129 | 558.3358  | 279.6715 |
| I       | 779.5026  | 390.2549 | 487.2987  | 244.1530 |
| A       | 850.5397  | 425.7735 | 374.2146  | 187.6110 |
| A       | 921.5768  | 461.2920 | 303.1775  | 152.0924 |
| G       | 978.5982  | 489.8028 | 232.1404  | 116.5738 |
| R       | 1134.6994 | 567.8533 | 175.1190  | 88.0631  |

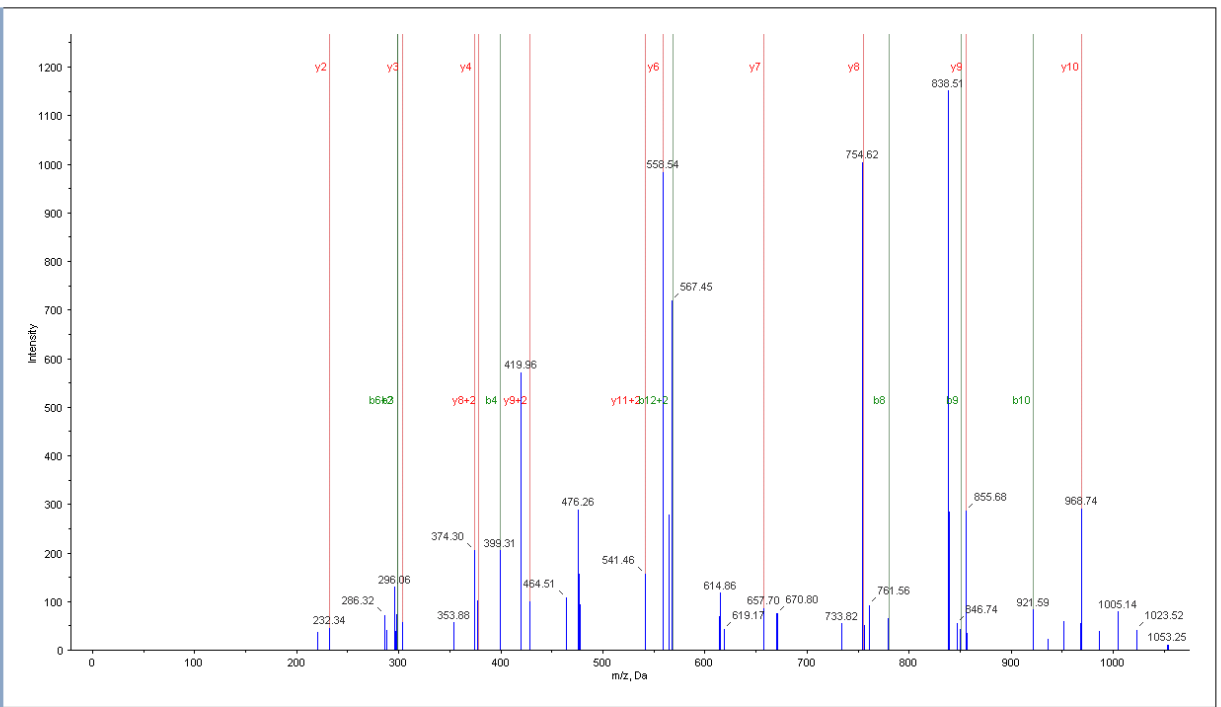

| Spectrum      | Two Step Method | Conf | Sc |
|---------------|-----------------|------|----|
| 19.1.1.6769.1 | ALLTPVAIAAGR    | 99.0 | 13 |

**Workflow Tasks**

- Identify Proteins
- LC...
- Spot-Based (MS only)...
- Spot-Based (MS and MS/MS)...
- View
- Analysis Log...
- Result...
- Export
- Peptide Summary...
- Protein Summary...
- MGF Peaklist(s)...

Protein ID Spectra Summary Statistics

**Spectrum List**

| Spectrum      | Time | Prec MW   | Prec m/z | Prec z | Prot N | Best Sequence   | Modifications | Conf | Theor MW  | z |
|---------------|------|-----------|----------|--------|--------|-----------------|---------------|------|-----------|---|
| 19.1.1.7363.1 |      | 1700.8761 | 851.4453 | 2      | 929    | VQIVGDDLFVTNPER |               | 97.4 | 1700.8733 | 2 |

**Peptide ID Hypotheses - 19.1.1.7363.1**

| Conf | Sc | Prot N | Sequence                  | Modifications   | Theor MW  | Theor m/z | z | ΔMass   |
|------|----|--------|---------------------------|-----------------|-----------|-----------|---|---------|
| 97.4 | 13 | 929    | VQIVGDDLFVTNPER           |                 | 1700.8733 | 851.4440  | 2 | 0.0027  |
| 97.4 | 13 |        | VQIVGDDIFVTNPER           |                 | 1700.8733 | 851.4440  | 2 | 0.0027  |
| 97.4 | 13 |        | VQIVGDDLFVTNPER           |                 | 1700.8733 | 851.4440  | 2 | 0.0027  |
| <1   | 9  | 1596   | ALNTNGHLDNKAAVTYK         | Deamidated(N)@3 | 1700.8694 | 851.4420  | 2 | 0.0067  |
| <1   | 7  | 1765   | CLLKSI GA E V P D E A E K |                 | 1700.8655 | 851.4400  | 2 | 0.0105  |
| <1   | 10 |        | GENYDVAMTLIRLAR           | Deamidated(N)@3 | 1700.8846 | 851.4496  | 2 | -0.0086 |
| <1   | 9  |        | EASLPSTVEEVGDIKK          |                 | 1700.8833 | 851.4469  | 2 | -0.0072 |

**Precursor MS Region**

No Data Showing

**Fragmentation Evidence for Peptide**

VQIVGDDLFVTNPER

| Residue | b         | b+2      | y         | y+2      |
|---------|-----------|----------|-----------|----------|
| V       | 100.0757  | 50.5415  | 1701.8906 | 851.4440 |
| Q       | 228.1343  | 114.5708 | 1602.8122 | 801.9097 |
| I       | 341.2183  | 171.1128 | 1474.7536 | 737.8805 |
| V       | 440.2867  | 220.6470 | 1361.6696 | 681.3384 |
| G       | 497.3082  | 249.1577 | 1262.6012 | 631.8042 |
| D       | 612.3352  | 306.6712 | 1205.5797 | 603.2935 |
| D       | 727.3621  | 364.1847 | 1090.5527 | 545.7800 |
| L       | 840.4462  | 420.7267 | 975.5258  | 488.2665 |
| F       | 987.6146  | 494.2609 | 862.4417  | 431.7245 |
| V       | 1086.6830 | 543.7951 | 715.3733  | 358.1903 |
| T       | 1187.6307 | 594.3190 | 616.3049  | 308.6561 |
| N       | 1301.6738 | 651.3404 | 516.2572  | 258.1323 |
| P       | 1398.7264 | 699.8668 | 401.2143  | 201.1108 |
| E       | 1527.7690 | 764.3881 | 304.1815  | 152.5844 |
| R       | 1683.8701 | 842.4387 | 175.1190  | 88.0631  |

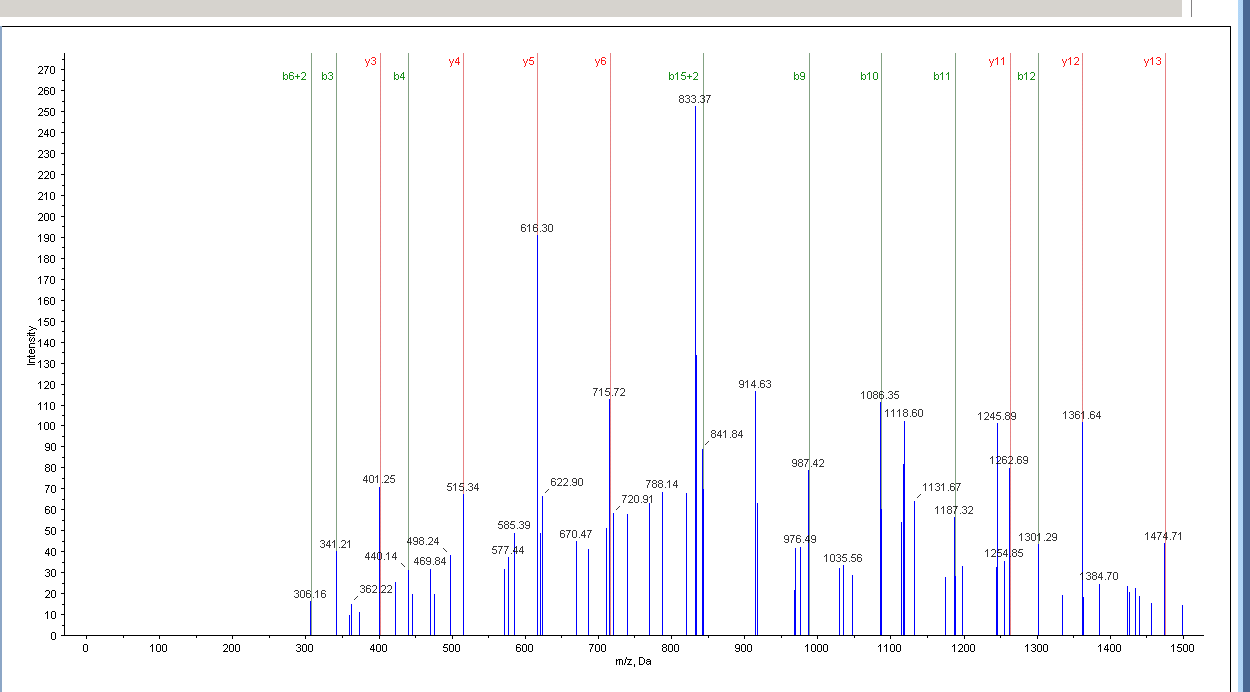

| Spectrum      | One Step Method | Conf | Sc |
|---------------|-----------------|------|----|
| 19.1.1.7363.1 | VQIVGDDLFVTNPER | 97.4 | 13 |



**Workflow Tasks**

- Identify Proteins
- LC...
- Spot-Based (MS only)...
- Spot-Based (MS and MS/MS)...
- View
- Analysis Log...
- Result...
- Export
- Peptide Summary...
- Protein Summary...
- MGF Peaklist(s)...

| Protein ID           |      |           |          |        |        |                |  |  |  | Spectra |  |  |  |  |  |               |  |  |  | Summary Statistics |  |  |  |  |  |      |           |   |  |
|----------------------|------|-----------|----------|--------|--------|----------------|--|--|--|---------|--|--|--|--|--|---------------|--|--|--|--------------------|--|--|--|--|--|------|-----------|---|--|
| <b>Spectrum List</b> |      |           |          |        |        |                |  |  |  |         |  |  |  |  |  |               |  |  |  |                    |  |  |  |  |  |      |           |   |  |
| Spectrum             | Time | Prec MW   | Prec m/z | Prec z | Prot N | Best Sequence  |  |  |  |         |  |  |  |  |  | Modifications |  |  |  |                    |  |  |  |  |  | Conf | Theor MW  | z |  |
| 19.1.1.7363.1        |      | 1700.8761 | 851.4453 | 2      | 1007   | VQLVGDDLFTNPER |  |  |  |         |  |  |  |  |  |               |  |  |  |                    |  |  |  |  |  | 98   | 1700.8733 | 2 |  |

**Peptide ID Hypotheses - 19.1.1.7363.1**

| Conf | Sc | Prot N | Sequence          | Modifications | Theor MW  | Theor m/z | z | ΔMass   |
|------|----|--------|-------------------|---------------|-----------|-----------|---|---------|
| 98   | 13 | 1007   | VQLVGDDLFTNPER    |               | 1700.8733 | 851.4440  | 2 | 0.0027  |
| <1   | 7  |        | KGLPSSCLESRGPAAEK |               | 1700.8767 | 851.4456  | 2 | -0.0007 |
| <1   | 7  |        | WTLNSGKAREWTPR    |               | 1700.8746 | 851.4446  | 2 | -0.0013 |
| <1   | 6  |        | ERDRIDPSAASILMK   |               | 1700.8879 | 851.4512  | 2 | -0.0119 |
| <1   | 6  |        | IESGQLSLEPAAFSPR  |               | 1700.8733 | 851.4440  | 2 | 0.0027  |

**Precursor MS Region**

No Data Showing

**Fragmentation Evidence for Peptide**

VQLVGDDLFTNPER

| Residue | b                | b+2             | y                | y+2      |
|---------|------------------|-----------------|------------------|----------|
| V       | 100.0757         | 50.5415         | 1701.8806        | 851.4440 |
| Q       | 228.1343         | 114.5708        | 1602.8122        | 801.9097 |
| L       | <b>341.2183</b>  | 171.1128        | <b>1474.7536</b> | 737.8805 |
| V       | <b>440.2867</b>  | 220.6470        | <b>1361.6696</b> | 681.3384 |
| G       | 497.3082         | 249.1577        | <b>1262.6012</b> | 631.8042 |
| D       | 612.3352         | <b>306.6712</b> | 1205.5797        | 603.2935 |
| D       | 727.3621         | 364.1847        | 1090.5527        | 545.7800 |
| L       | 840.4462         | 420.7267        | 975.5258         | 488.2665 |
| F       | <b>987.5146</b>  | 494.2609        | 862.4417         | 431.7245 |
| V       | <b>1086.5830</b> | 543.7951        | <b>715.3733</b>  | 358.1903 |
| T       | <b>1187.6307</b> | 594.3190        | <b>616.3049</b>  | 308.6561 |
| N       | <b>1301.6736</b> | 651.3404        | <b>515.2572</b>  | 258.1323 |
| P       | 1398.7264        | 699.8668        | <b>401.2143</b>  | 201.1108 |
| E       | 1527.7690        | 764.3881        | 304.1815         | 152.5844 |
| R       | 1683.8701        | <b>842.4387</b> | 175.1190         | 88.0631  |

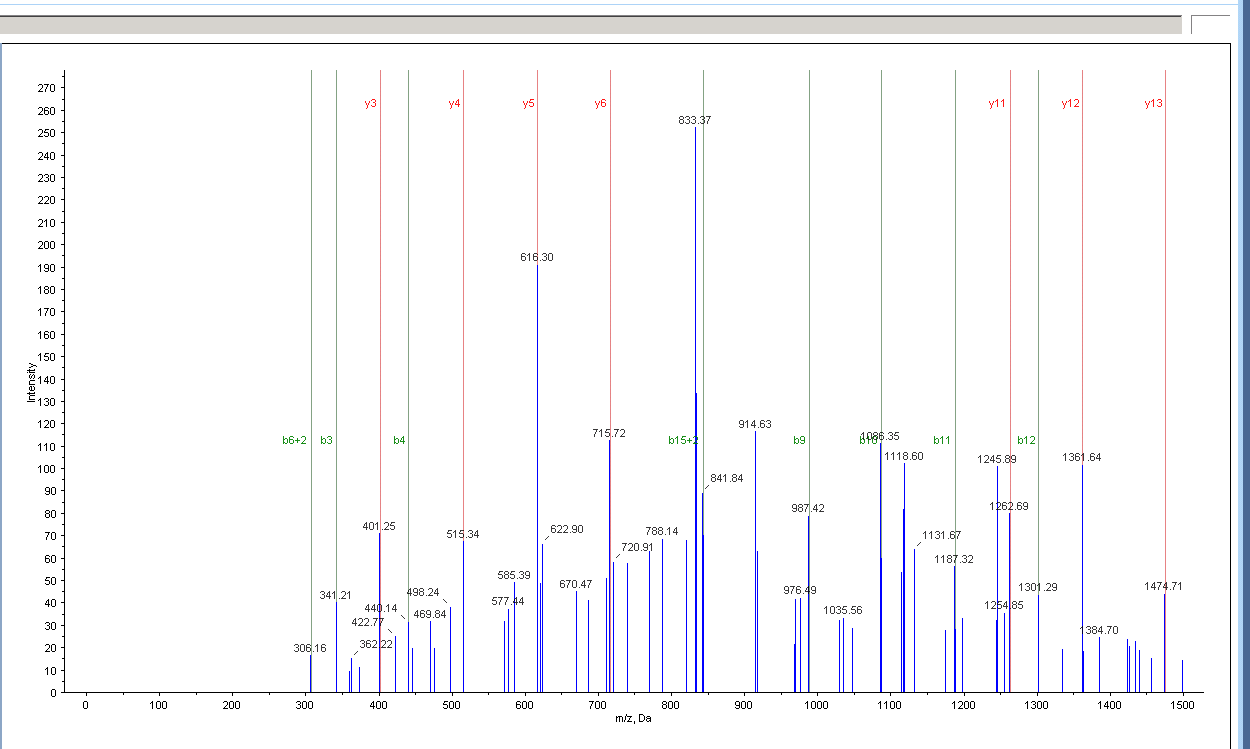

| Spectrum      | Two Step Method | Conf | Sc |
|---------------|-----------------|------|----|
| 19.1.1.7363.1 | VQLVGDDLFTNPER  | 99.0 | 13 |

**Spectrum List**

| Spectrum      | Time | Prec MW   | Prec m/z | Prec z | Prot N | Best Sequence       | Modifications                  | Conf | Theor MW  | z |
|---------------|------|-----------|----------|--------|--------|---------------------|--------------------------------|------|-----------|---|
| 19.1.1.7502.1 |      | 1969.9125 | 985.9635 | 2      | 911    | GDMGIEVVPFEMVPPVYQK | Oxidation(M)@3, Oxidation(...) | 99   | 1969.9165 | 2 |

**Peptide ID Hypotheses - 19.1.1.7502.1**

| Conf | Sc | Prot N | Sequence            | Modifications                  | Theor MW  | Theor m/z | z | ΔMass   |
|------|----|--------|---------------------|--------------------------------|-----------|-----------|---|---------|
| 99   | 16 | 911    | GDMGIEVVPFEMVPPVYQK | Oxidation(M)@3, Oxidation(...) | 1969.9165 | 985.9655  | 2 | -0.0041 |
| <1   | 16 |        | GDMGIEVVPFEMVPPVYQK | Oxidation(M)@3, Oxidation(...) | 1969.9165 | 985.9655  | 2 | -0.0041 |
| <1   | 8  |        | ANLHAEFDYLVLEQQT    | Deamidated(O)@16               | 1969.9269 | 985.9707  | 2 | -0.0145 |
| <1   | 8  |        | DTCLVDAAAGFNQISNMKK | Oxidation(M)@16                | 1969.9237 | 985.9692  | 2 | -0.0113 |
| <1   | 8  |        | FDIHSLLDRETMMDYR    | Oxidation(M)@4                 | 1969.9237 | 985.9692  | 2 | -0.0113 |

**Precursor MS Region**

No Data Showing

**Fragmentation Evidence for Peptide**

[GDM(Ox)]GIEVVPFEM(Ox)VPVYQK

| Residue | b                | b+2             | y                | y+2      |
|---------|------------------|-----------------|------------------|----------|
| G       | 58.0287          | 29.5180         | 1970.9236        | 985.9655 |
| D       | 173.0557         | 87.0315         | 1913.9023        | 957.4548 |
| M(Ox)   | 320.0911         | 160.5452        | 1798.8754        | 899.9413 |
| G       | 377.1125         | 189.0599        | <b>1651.8400</b> | 826.4236 |
| I       | 490.1966         | 245.6019        | <b>1594.8185</b> | 797.9129 |
| E       | <b>619.2392</b>  | 310.1232        | <b>1481.7345</b> | 741.3709 |
| V       | <b>718.3076</b>  | 359.8574        | <b>1352.6919</b> | 676.8496 |
| P       | 815.3604         | 408.1838        | <b>1253.6235</b> | 627.3154 |
| F       | 962.4288         | 481.7180        | 1156.5707        | 578.7890 |
| E       | <b>1091.4714</b> | 546.2393        | 1009.5023        | 505.2548 |
| M(Ox)   | 1238.5068        | <b>619.7570</b> | <b>880.4597</b>  | 440.7335 |
| V       | <b>1337.5752</b> | 669.2912        | 733.4243         | 367.2158 |
| P       | 1434.6280        | <b>717.8176</b> | 634.3559         | 317.6816 |
| V       | <b>1533.6964</b> | 767.3518        | 537.3031         | 269.1552 |
| Y       | <b>1696.7597</b> | <b>848.8835</b> | <b>438.2347</b>  | 219.6210 |
| Q       | 1824.8183        | 912.9128        | 275.1714         | 138.0893 |
| K       | 1952.9132        | 976.9603        | 147.1128         | 74.0600  |

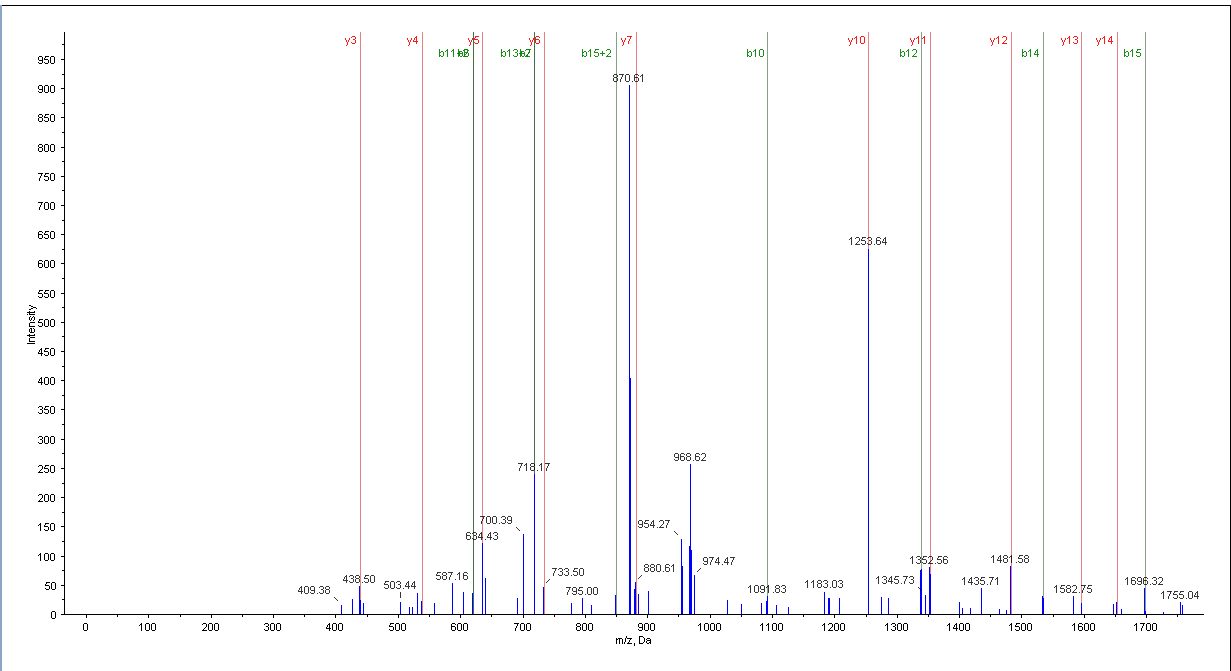

**Spectrum** 19.1.1.7502.1 **One Step Method** GDMGIEVVPFEMVPPVYQK **Conf** 99 **Sc** 16

| Protein ID                                   | Spectra     | Summary Statistics                                                                                                                        |
|----------------------------------------------|-------------|-------------------------------------------------------------------------------------------------------------------------------------------|
| <b>Spectrum List</b>                         |             |                                                                                                                                           |
| <b>Spectrum</b> ▾                            | <b>Time</b> | <b>Prec MW</b> <b>Prec m/z</b> <b>Prec z</b> <b>Prot N</b> <b>Best Sequence</b> <b>Modifications</b> <b>Conf</b> <b>Theor MW</b> <b>z</b> |
| 19.1.1.7502.1                                |             | 1969.9125 985.9635 2 ANLHAE PDYLEVLEQQT Deamidated(Q)@16 <1 1969.9268 2                                                                   |
| <b>Peptide ID Hypotheses - 19.1.1.7502.1</b> |             |                                                                                                                                           |
| <b>Conf</b> ▾                                | <b>Sc</b>   | <b>Prot N</b> <b>Sequence</b> <b>Modifications</b> <b>Theor MW</b> <b>Theor m/z</b> <b>z</b> <b>ΔMass</b> ▾                               |
| <1                                           | 8           | ANLHAE PDYLEVLEQQT Deamidated(Q)@16 1969.9268 985.9707 2 -0.0145                                                                          |
| <1                                           | 6           | SFKKNIDSI SSEEQSDR Deamidated(Q)@14 1969.9228 985.9687 2 -0.0104                                                                          |
| <1                                           | 6           | SSHNF PFIIG LLEDINAM Deamidated(N)@16 1969.9092 985.9619 2 0.0033                                                                         |
| <1                                           | 4           | DCMHFCHEVTR LHSYK 1969.9073 985.9609 2 0.0051                                                                                             |
| <1                                           | 4           | GELQPD SRAAE SPPRETY 1969.9164 985.9655 2 -0.0039                                                                                         |
| <b>Precursor MS Region</b>                   |             |                                                                                                                                           |
| No Data Showing                              |             |                                                                                                                                           |

| Fragmentation Evidence for Peptide |           |          |           |          |
|------------------------------------|-----------|----------|-----------|----------|
| ANLHAE PDYLEVLEQQT[Dea]T           |           |          |           |          |
| Residue                            | b         | b+2      | y         | y+2      |
| A                                  | 72.0444   | 36.5258  | 1970.9342 | 985.9707 |
| N                                  | 186.0873  | 93.5473  | 1899.8971 | 950.4522 |
| L                                  | 299.1714  | 150.0893 | 1785.8541 | 893.4307 |
| H                                  | 436.2303  | 218.6188 | 1672.7701 | 836.8887 |
| A                                  | 507.2674  | 254.1373 | 1535.7112 | 768.3592 |
| E                                  | 636.3100  | 318.6586 | 1464.6740 | 732.8407 |
| P                                  | 733.3628  | 367.1850 | 1335.6315 | 668.3194 |
| D                                  | 848.3897  | 424.6985 | 1238.5797 | 619.7930 |
| Y                                  | 1011.4530 | 506.2302 | 1123.5517 | 562.2795 |
| L                                  | 1124.5371 | 562.7722 | 960.4884  | 480.7478 |
| E                                  | 1253.5797 | 627.2935 | 847.4044  | 424.2058 |
| V                                  | 1352.6481 | 676.8277 | 718.3618  | 359.6845 |
| L                                  | 1485.7322 | 733.3697 | 619.2933  | 310.1503 |
| E                                  | 1594.7748 | 797.8910 | 506.2093  | 253.6083 |
| Q                                  | 1722.8333 | 861.9203 | 377.1667  | 189.0870 |
| Q[Dea]                             | 1851.8759 | 926.4416 | 249.1081  | 125.0577 |
| T                                  | 1952.9236 | 976.9654 | 120.0655  | 60.5364  |

| Spectrum      | Two Step Method    | Conf | Sc |
|---------------|--------------------|------|----|
| 19.1.1.7502.1 | ANLHAE PDYLEVLEQQT | 8.0  | 1  |

**Workflow Tasks**

Identify Proteins

LC...

Spot-Based (MS only)...

Spot-Based (MS and MS/MS)...

View

Analysis Log...

Result...

Export

Peptide Summary...

Protein Summary...

MGF Peaklist(s)...

| Protein ID           |      |           |          |        |        | Spectra         |               |      |           | Summary Statistics |  |
|----------------------|------|-----------|----------|--------|--------|-----------------|---------------|------|-----------|--------------------|--|
| <b>Spectrum List</b> |      |           |          |        |        |                 |               |      |           |                    |  |
| Spectrum             | Time | Prec MW   | Prec m/z | Prec z | Prot N | Best Sequence   | Modifications | Conf | Theor MW  | z                  |  |
| 19.1.1.8053.1        |      | 1599.8872 | 800.9509 | 2      | 962    | VAQEEIFGPVATVIK |               | 96.4 | 1599.8872 | 2                  |  |

**Peptide ID Hypotheses - 19.1.1.8053.1**

| Conf | Sc | Prot N | Sequence          | Modifications   | Theor MW  | Theor m/z | z | ΔMass  |
|------|----|--------|-------------------|-----------------|-----------|-----------|---|--------|
| 96.4 | 12 | 962    | VAQEEIFGPVATVIK   |                 | 1599.8872 | 800.9509  | 2 | 0.0000 |
| <1   | 8  |        | DLVVKD SRN ID VVK | Deamidated(N)@9 | 1599.8832 | 800.9489  | 2 | 0.0041 |
| <1   | 8  |        | LINSKI IIDNGSADK  |                 | 1599.8832 | 800.9489  | 2 | 0.0041 |
| <1   | 8  |        | VQLYGFTRVAP IISK  | Deamidated(N)@8 | 1599.8872 | 800.9509  | 2 | 0.0000 |
| <1   | 7  |        | AREVIDTMLETVLK    |                 | 1599.8832 | 800.9489  | 2 | 0.0041 |

**Precursor MS Region**

No Data Showing

**Fragmentation Evidence for Peptide**

VAQEEIFGPVATVIK

| Residue | b         | b+2      | y         | y+2      |
|---------|-----------|----------|-----------|----------|
| V       | 100.0757  | 50.5415  | 1600.8945 | 800.9509 |
| A       | 171.1128  | 86.0600  | 1501.8261 | 751.4167 |
| Q       | 299.1714  | 150.0893 | 1430.7890 | 715.8981 |
| E       | 428.2140  | 214.6106 | 1302.7304 | 651.8688 |
| E       | 557.2566  | 279.1319 | 1173.6678 | 587.3475 |
| I       | 670.3406  | 335.6740 | 1044.6452 | 522.8262 |
| F       | 817.4090  | 409.2082 | 931.5611  | 466.2842 |
| G       | 874.4305  | 437.7189 | 784.4927  | 392.7500 |
| P       | 971.4833  | 486.2453 | 727.4713  | 364.2393 |
| V       | 1070.5517 | 535.7795 | 630.4185  | 315.7129 |
| A       | 1141.5888 | 571.2980 | 531.3501  | 266.1787 |
| T       | 1242.6365 | 621.8219 | 460.3130  | 230.6601 |
| V       | 1341.7049 | 671.3561 | 359.2653  | 180.1363 |
| I       | 1454.7890 | 727.8981 | 260.1969  | 130.6021 |
| K       | 1582.8839 | 791.9456 | 147.1128  | 74.0600  |

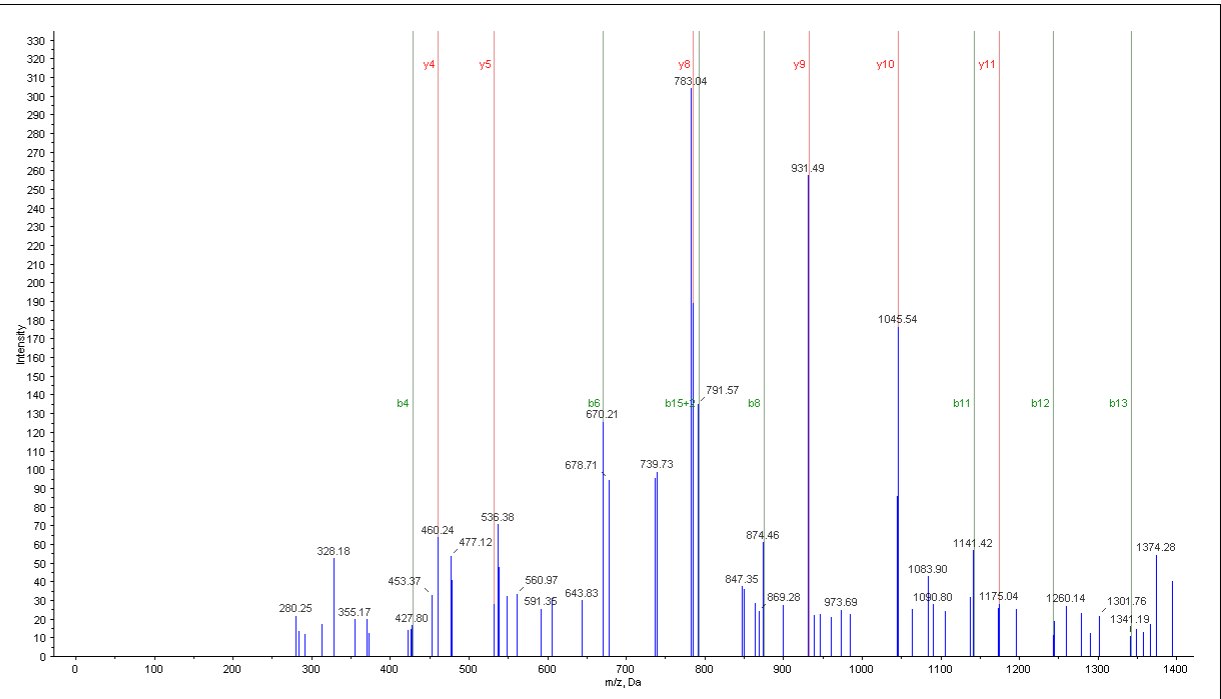

| Spectrum      | One Step Method | Conf | Sc |
|---------------|-----------------|------|----|
| 19.1.1.8053.1 | VAQEEIFGPVATVIK | 96.4 | 12 |

- Workflow Tasks
- Identify Proteins
- LC...
- Spot-Based (MS only)...
- Spot-Based (MS and MS/MS)...
- View
- Analysis Log...
- Result...
- Export
- Peptide Summary...
- Protein Summary...
- MGF Peaklist(s)...

| Protein ID           |      | Spectra   |          |        |        |                 | Summary Statistics |      |           |   |
|----------------------|------|-----------|----------|--------|--------|-----------------|--------------------|------|-----------|---|
| <b>Spectrum List</b> |      |           |          |        |        |                 |                    |      |           |   |
| Spectrum             | Time | Prec MW   | Prec m/z | Prec z | Prot H | Best Sequence   | Modifications      | Conf | Theor MW  | z |
| 19.1.1.8053.1        |      | 1599.8873 | 800.9509 | 2      |        | VQLYGPTNVAPIISK | Deamidated(N)@6    | 12.4 | 1599.8872 | 2 |

| <b>Peptide ID Hypotheses - 19.1.1.8053.1</b> |    |        |                 |                 |           |           |   |         |  |
|----------------------------------------------|----|--------|-----------------|-----------------|-----------|-----------|---|---------|--|
| Conf                                         | Sc | Prot H | Sequence        | Modifications   | Theor MW  | Theor m/z | z | ΔMass   |  |
| 12.4                                         | 8  |        | VQLYGPTNVAPIISK | Deamidated(N)@6 | 1599.8872 | 800.9509  | 2 | 0.0000  |  |
| <1                                           | 6  |        | LNELQLNQSIVTLK  |                 | 1599.8832 | 800.9489  | 2 | 0.0041  |  |
| <1                                           | 6  |        | NQKLEIALTLDTK   |                 | 1599.8832 | 800.9489  | 2 | 0.0041  |  |
| <1                                           | 6  |        | TVVQIUSIVGTTIR  | Deamidated(O)@5 | 1599.8984 | 800.9565  | 2 | -0.0112 |  |
| <1                                           | 6  |        | VIRESIERNKQA    |                 | 1599.8733 | 800.9439  | 2 | 0.0140  |  |

**Precursor MS Region**

No Data Showing

**Fragmentation Evidence for Peptide**

VQLYGPTN[Dea]VAPIISK

| Residue | b                | b+2             | y                | y+2      |
|---------|------------------|-----------------|------------------|----------|
| V       | 100.0757         | 50.5415         | 1800.8945        | 800.9509 |
| Q       | 228.1343         | 114.5708        | 1501.8261        | 751.4167 |
| L       | 341.2183         | 171.1128        | <b>1373.7675</b> | 687.3874 |
| Y       | 504.2817         | 252.6445        | <b>1260.6834</b> | 630.8454 |
| G       | <b>561.3031</b>  | 281.1552        | 1097.6201        | 549.3137 |
| P       | 658.3559         | 329.6816        | 1040.5986        | 520.8030 |
| T       | 759.4036         | 380.2054        | 943.5459         | 472.2766 |
| N[Dea]  | <b>874.4305</b>  | 437.7189        | 842.4982         | 421.7527 |
| V       | <b>873.4989</b>  | 437.2531        | 727.4713         | 364.2393 |
| A       | <b>1044.5360</b> | 522.7717        | 628.4028         | 314.7051 |
| P       | <b>1141.5888</b> | 571.2980        | 557.3657         | 279.1865 |
| I       | 1254.6729        | 627.8401        | <b>460.3130</b>  | 230.6601 |
| I       | 1367.7569        | 684.3821        | 347.2289         | 174.1181 |
| S       | 1454.7890        | 727.8981        | 234.1448         | 117.5761 |
| K       | 1582.8839        | <b>791.9456</b> | 147.1128         | 74.0600  |

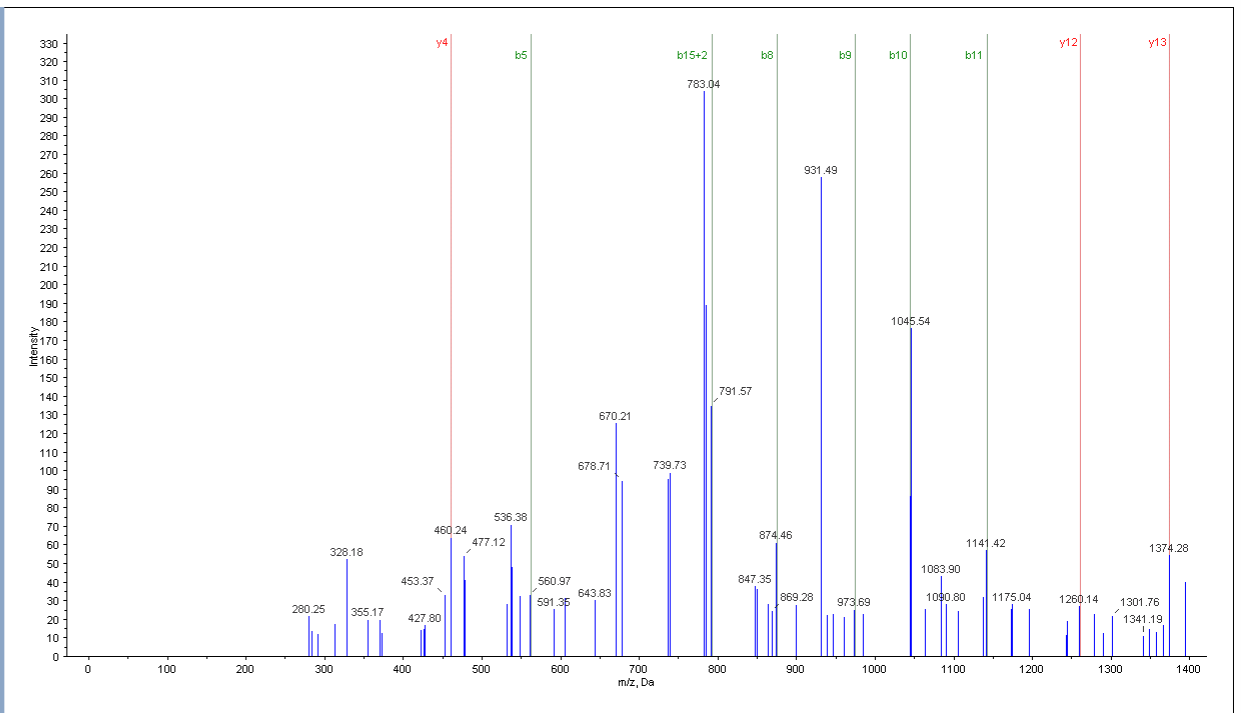

| Spectrum      | Two Step Method | Conf | Sc |
|---------------|-----------------|------|----|
| 19.1.1.8053.1 | VQLYGPTNVAPIISK | 12.4 | 8  |

**Workflow Tasks**

- Identify Proteins
- LC...
- Spot-Based (MS only)...
- Spot-Based (MS and MS/MS)...
- View
- Analysis Log...
- Result...
- Export
- Peptide Summary...
- Protein Summary...
- MGF Peaklist(s)...

**Spectrum List**

| Spectrum      | Time | Prec MW   | Prec m/z | Prec z | Prot N | Best Sequence  | Modifications | Conf | Theor MW  | z |
|---------------|------|-----------|----------|--------|--------|----------------|---------------|------|-----------|---|
| 33.1.1.4545.1 |      | 1366.7087 | 684.3616 | 2      | 27     | ASGEVPLDVAPQGK |               | 99   | 1366.7092 | 2 |

**Peptide ID Hypotheses - 33.1.1.4545.1**

| Conf | Sc | Prot N | Sequence       | Modifications        | Theor MW  | Theor m/z | z | ΔMass   |
|------|----|--------|----------------|----------------------|-----------|-----------|---|---------|
| 99   | 15 | 27     | ASGEVPLDVAPQGK |                      | 1366.7092 | 684.3619  | 2 | -0.0006 |
| <1   | 4  | 97     | AHSSHWGVNLPQK  |                      | 1366.7028 | 684.3586  | 2 | 0.0059  |
| <1   | 4  | 528    | SVTGTVDIVVFSK  |                      | 1366.6980 | 684.3563  | 2 | 0.0106  |
| <1   | 9  |        | AKDNAVHSTRFK   |                      | 1366.7028 | 684.3586  | 2 | 0.0059  |
| <1   | 9  |        | QASGVVYFLPLGK  | Deamidated(O)@1      | 1366.7133 | 684.3639  | 2 | -0.0046 |
| <1   | 8  |        | ESKTAHDFLMKK   |                      | 1366.7205 | 684.3675  | 2 | -0.0118 |
| <1   | 8  |        | QIFGAHDSALAVR  | Gln->pyro-Glu@N-term | 1366.6993 | 684.3569  | 2 | 0.0093  |

**Precursor MS Region**

No Data Showing

**Fragmentation Evidence for Peptide**

ASGEVPLDVAPQGK

| Residue | b         | b+2      | y         | y+2      |
|---------|-----------|----------|-----------|----------|
| A       | 72.0444   | 36.5258  | 1367.7185 | 684.3619 |
| S       | 159.0764  | 80.0418  | 1296.6794 | 648.8433 |
| G       | 216.0979  | 108.5526 | 1209.6474 | 605.3273 |
| E       | 345.1405  | 173.0739 | 1152.6259 | 576.8166 |
| V       | 444.2089  | 222.6081 | 1023.5833 | 512.2953 |
| P       | 541.2617  | 271.1345 | 924.5149  | 462.7611 |
| L       | 654.3457  | 327.6785 | 827.4621  | 414.2347 |
| D       | 769.3727  | 385.1900 | 714.3781  | 357.6927 |
| V       | 868.4411  | 434.7242 | 599.3511  | 300.1792 |
| A       | 939.4782  | 470.2427 | 500.2827  | 250.6450 |
| P       | 1036.5310 | 518.7691 | 429.2456  | 215.1264 |
| Q       | 1164.5895 | 582.7984 | 332.1928  | 166.6001 |
| G       | 1221.6110 | 611.3091 | 204.1343  | 102.5708 |
| K       | 1349.7060 | 675.3566 | 147.1128  | 74.0600  |

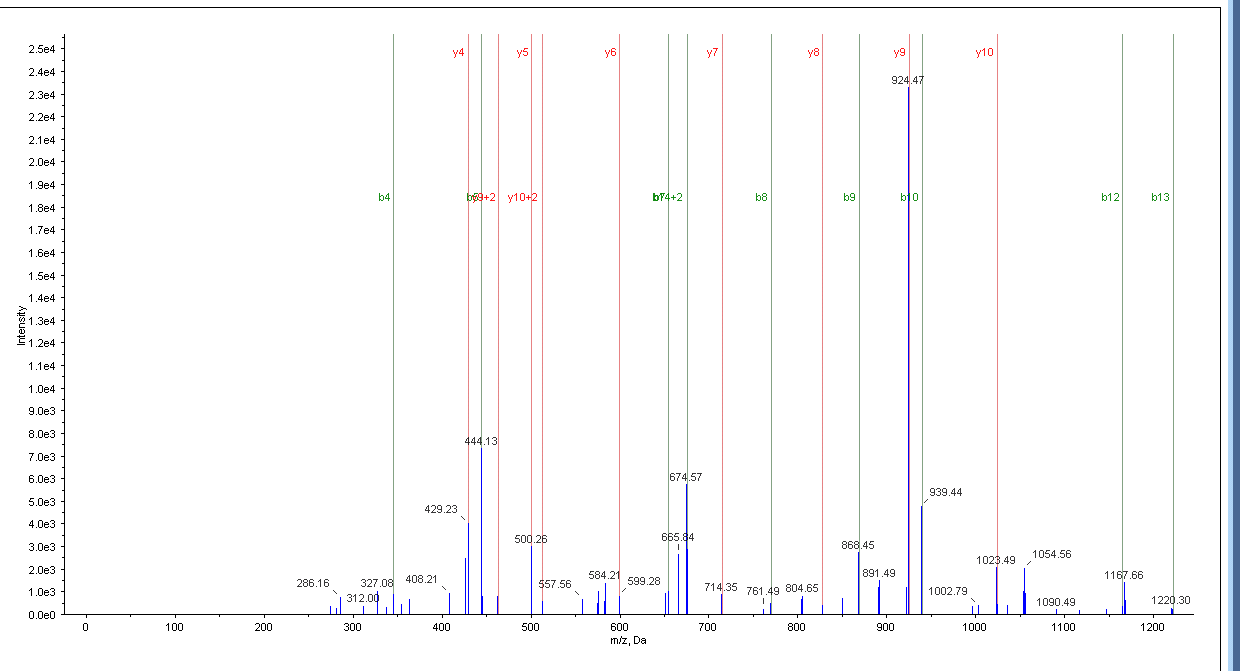

| Spectrum      | One Step Method | Conf | Sc |
|---------------|-----------------|------|----|
| 33.1.1.4545.1 | ASGEVPLDVAPQGK  | 99   | 15 |

**Workflow Tasks**

- Identify Proteins
- LC...
- Spot-Based (MS only)...
- Spot-Based (MS and MS/MS)...
- View
- Analysis Log...
- Result...
- Export
- Peptide Summary...
- Protein Summary...
- MGF Peaklist(s)...

| Protein ID           |      | Spectra   |          |        |        | Summary Statistics |               |  |  |      |           |   |
|----------------------|------|-----------|----------|--------|--------|--------------------|---------------|--|--|------|-----------|---|
| <b>Spectrum List</b> |      |           |          |        |        |                    |               |  |  |      |           |   |
| Spectrum             | Time | Prec MW   | Prec m/z | Prec z | Prot N | Best Sequence      | Modifications |  |  | Conf | Theor MW  | z |
| 33.1.1.4545.1        |      | 1366.7086 | 684.3616 | 2      | 2038   | AKDNAVMSTRFK       |               |  |  | 76.5 | 1366.7028 | 2 |

**Peptide ID Hypotheses - 33.1.1.4545.1**

| Conf | Sc | Prot N | Sequence      | Modifications   | Theor MW  | Theor m/z | z | ΔMass   |
|------|----|--------|---------------|-----------------|-----------|-----------|---|---------|
| 76.5 | 9  | 2038   | AKDNAVMSTRFK  |                 | 1366.7028 | 684.3586  | 2 | 0.0059  |
| <1   | 4  | 90     | AHSSMVGWMLPQK |                 | 1366.7028 | 684.3586  | 2 | 0.0059  |
| <1   | 4  | 353    | SVTGTVDVIVFSK |                 | 1366.6980 | 684.3563  | 2 | 0.0106  |
| <1   | 6  |        | FSQNSHLIKHR   | Deamidated(N)@4 | 1366.7106 | 684.3625  | 2 | -0.0019 |
| <1   | 6  |        | HRPQVLSMKFK   | Oxidation(M)@6  | 1366.7180 | 684.3663  | 2 | -0.0093 |
| <1   | 6  |        | RNVVDLDAASHR  | Deamidated(N)@2 | 1366.6953 | 684.3549  | 2 | 0.0133  |
| <1   | 6  |        | TNKVYDITERK   | Deamidated(N)@2 | 1366.7092 | 684.3619  | 2 | -0.0006 |

**Precursor MS Region**

No Data Showing

**Fragmentation Evidence for Peptide**

AKDNAVMSTRFK

| Residue | b                | b+2             | y                | y+2             |
|---------|------------------|-----------------|------------------|-----------------|
| A       | 72.0444          | 36.5258         | 1367.7100        | 684.3586        |
| K       | 200.1394         | 100.5733        | 1296.6729        | 648.8401        |
| D       | 315.1663         | 158.0868        | <b>1168.5779</b> | <b>584.7926</b> |
| N       | <b>429.2092</b>  | 215.1083        | <b>1053.5510</b> | 527.2791        |
| A       | <b>500.2463</b>  | 250.6268        | <b>938.5080</b>  | 470.2577        |
| V       | <b>599.3148</b>  | 300.1610        | <b>868.4709</b>  | 434.7391        |
| M       | 730.3552         | 365.6813        | <b>769.4025</b>  | 385.2049        |
| S       | 817.3873         | 409.1973        | 638.3620         | 319.6847        |
| T       | 918.4349         | 459.7211        | 551.3300         | 276.1686        |
| R       | 1074.5361        | 537.7717        | 450.2823         | 225.6448        |
| F       | <b>1221.6045</b> | 611.3059        | 294.1812         | 147.5942        |
| K       | 1349.6994        | <b>676.3534</b> | 147.1128         | 74.0600         |

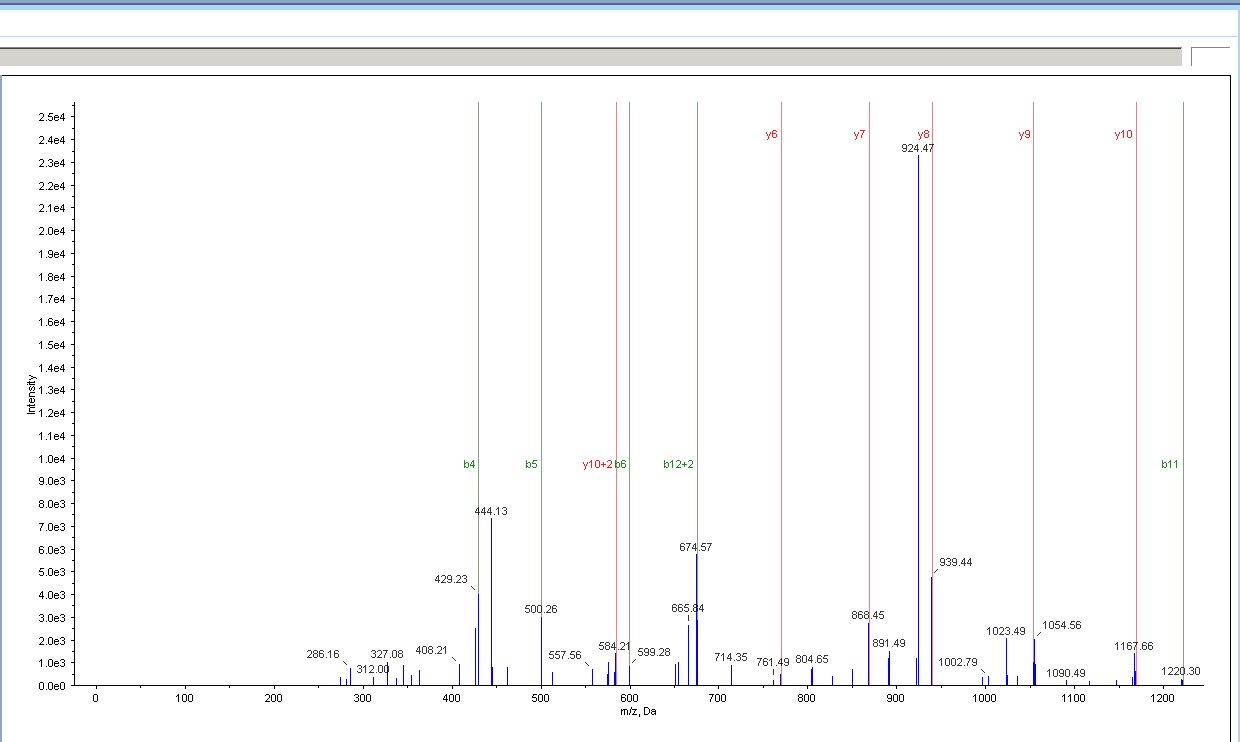

| Spectrum      | Two Step Method | Conf | Sc |
|---------------|-----------------|------|----|
| 33.1.1.4545.1 | AKDNAVMSTRFK    | 76.5 | 9  |

| <b>ProteoGenomics (Identified in one-step method but not by two-step method)</b> |                           |                |                                  |                |                                                            |                                                                                             |
|----------------------------------------------------------------------------------|---------------------------|----------------|----------------------------------|----------------|------------------------------------------------------------|---------------------------------------------------------------------------------------------|
| <b>Spectrum</b>                                                                  | <b>One Step Method</b>    | <b>Conf Sc</b> | <b>Two Step Method</b>           | <b>Conf Sc</b> | <b>Reason why it was not identified in two step method</b> |                                                                                             |
| 17.1.1.1993.1                                                                    | FRFPSAFFSSVFPAAIEPGERASAR | 99.0           | 13 LLNYNAQPLNSVQK<br>ALELTGEGEDK | 1              | 7                                                          | Protein present in second step database. Reason unknown.                                    |
| 26.1.1.484.1                                                                     | GLSHAAASPGGASAGGR         | 99.0           | 11 GLSHAAASPGGASAG<br>GR         | 24.1           | 11                                                         | Peptide identified at a lower Conf Sc.                                                      |
| 33.1.1.7390.1                                                                    | FNIHAPLCNTKK              | 99.0           | 13 NFLYAWCGKRK                   | 61.9           | 9                                                          | Similar accession numbers. Peptide identified when correct accession numbers were restored. |
| 35.1.1.3120.1                                                                    | EAMSSKVSR                 | 94.3           | 9 SISMSVAGSR                     | 44.9           | 7                                                          | Similar accession numbers. Peptide identified when correct accession numbers were restored. |
| 42.1.1.365.1                                                                     | MNVGGAGVAGK               | 97.5           | 9 MNVGGAGVAGK                    | 81.7           | 9                                                          | Peptide identified at a lower Conf Sc.                                                      |



File Configure Window Help

Workflow Tasks

Identify Proteins

LC...

Spot-Based (MS only)...

Spot-Based (MS and MS/MS)...

View

Analysis Log...

Result...

Export

Peptide Summary...

Protein Summary...

MGF Peaklist(s)...

| Protein ID |  |  |  |  |  |  |  |  |  | Spectra |  |  |  |  |  |  |  |  |  | Summary Statistics |  |  |  |  |  |  |  |  |  |
|------------|--|--|--|--|--|--|--|--|--|---------|--|--|--|--|--|--|--|--|--|--------------------|--|--|--|--|--|--|--|--|--|
|------------|--|--|--|--|--|--|--|--|--|---------|--|--|--|--|--|--|--|--|--|--------------------|--|--|--|--|--|--|--|--|--|

| Spectrum      | Time | Prec MW   | Prec m/z | Prec z | Prot N | Best Sequence           | Modifications | Conf | Theor MW  | z |
|---------------|------|-----------|----------|--------|--------|-------------------------|---------------|------|-----------|---|
| 17.1.1.1993.1 |      | 2743.3850 | 915.4690 | 3      | 697    | FRFPSAFFSSVFPAAIEPGERAS |               | 99   | 2743.3870 | 3 |

| Peptide ID Hypotheses - 17.1.1.1993.1 |    |        |                              |                 |           |           |   |         |  |
|---------------------------------------|----|--------|------------------------------|-----------------|-----------|-----------|---|---------|--|
| Conf                                  | Sc | Prot N | Sequence                     | Modifications   | Theor MW  | Theor m/z | z | ΔMass   |  |
| 99                                    | 13 | 697    | FRFPSAFFSSVFPAAIEPGERASAR    |                 | 2743.3870 | 915.4696  | 3 | -0.0020 |  |
| <1                                    | 9  |        | NVPAASNATAQIPSTIVTATRTTSMGGR |                 | 2743.3850 | 915.4689  | 3 | 0.0002  |  |
| <1                                    | 9  |        | TLPLQVCSRAQTQAVSGGAADLGEDRK  | Deamidated(O)@5 | 2743.3811 | 915.4677  | 3 | 0.0040  |  |
| <1                                    | 8  |        | AVQLHSKAGGQANSLRVGFGCSESLR   |                 | 2743.3977 | 915.4731  | 3 | -0.0126 |  |
| <1                                    | 8  |        | GCKSTTRYLLLSVAHSLMQLSTFGH    |                 | 2743.3860 | 915.4692  | 3 | -0.0009 |  |

Precursor MS Region

No Data Showing

Fragmentation Evidence for Peptide

| Residue | b         | b+2       | y         | y+2       |
|---------|-----------|-----------|-----------|-----------|
| F       | 148.0757  | 74.5415   | 2744.3943 | 1372.7008 |
| R       | 304.1768  | 152.5920  | 2597.3259 | 1299.1666 |
| F       | 451.2452  | 226.1262  | 2441.2248 | 1221.1160 |
| P       | 548.2960  | 274.6526  | 2294.1564 | 1147.5818 |
| S       | 635.3300  | 318.1686  | 2197.1036 | 1099.0555 |
| A       | 706.3671  | 353.6872  | 2110.0716 | 1055.5394 |
| F       | 853.4355  | 427.2214  | 2039.0345 | 1020.0209 |
| F       | 1000.5039 | 500.7556  | 1891.9661 | 946.4867  |
| S       | 1087.5360 | 544.2716  | 1744.8977 | 872.9525  |
| S       | 1174.5680 | 587.7876  | 1657.8656 | 829.4365  |
| V       | 1273.6364 | 637.3218  | 1570.8336 | 785.9204  |
| F       | 1420.7048 | 710.8561  | 1471.7652 | 736.3862  |
| P       | 1517.7576 | 759.3824  | 1324.6968 | 662.8520  |
| A       | 1588.7947 | 794.9010  | 1227.6440 | 614.3257  |
| A       | 1659.8318 | 830.4196  | 1156.6069 | 578.8071  |
| I       | 1772.9159 | 886.9616  | 1085.5698 | 543.2885  |
| E       | 1901.9585 | 951.4829  | 972.4857  | 486.7465  |
| P       | 1939.0112 | 1000.0093 | 843.4431  | 422.2252  |
| G       | 2056.0327 | 1028.5200 | 746.3904  | 373.6988  |
| E       | 2185.0753 | 1093.0413 | 689.3689  | 345.1881  |
| R       | 2341.1764 | 1171.0918 | 560.3263  | 280.6668  |
| A       | 2412.2135 | 1206.6104 | 404.2252  | 202.6162  |
| S       | 2499.2456 | 1250.1264 | 333.1881  | 167.0977  |
| A       | 2570.2827 | 1285.6450 | 246.1561  | 123.5817  |
| R       | 2726.3638 | 1363.6955 | 175.1190  | 88.0631   |

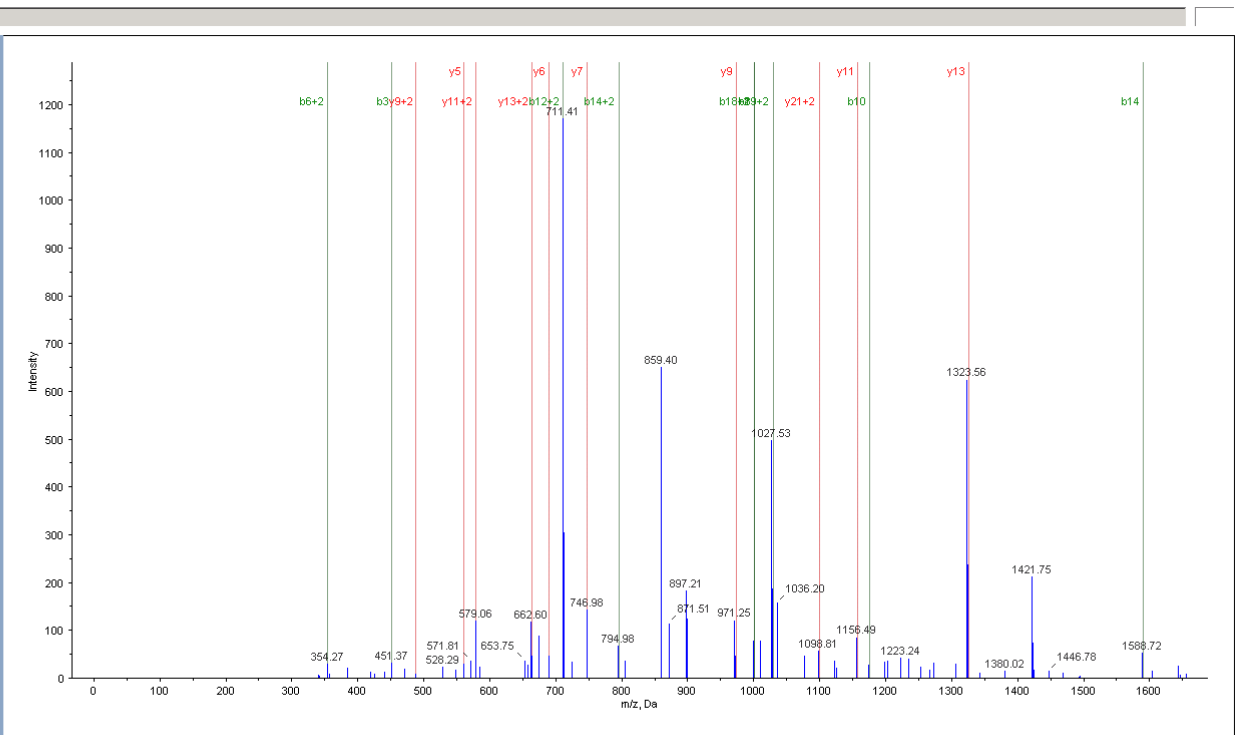

| Spectrum      | One Step Method           | Conf | Sc |
|---------------|---------------------------|------|----|
| 17.1.1.1993.1 | FRFPSAFFSSVFPAAIEPGERASAR | 99.0 | 13 |

| Protein ID                                   | Spectra     | Summary Statistics                                                                                                                                        |                            |                        |                 |                  |          |              |
|----------------------------------------------|-------------|-----------------------------------------------------------------------------------------------------------------------------------------------------------|----------------------------|------------------------|-----------------|------------------|----------|--------------|
| <b>Spectrum List</b>                         |             |                                                                                                                                                           |                            |                        |                 |                  |          |              |
| <b>Spectrum</b> /                            | <b>Time</b> | <b>Prec MW</b>   <b>Prec m/z</b>   <b>Prec z</b>   <b>Prot H</b>   <b>Best Sequence</b>   <b>Modifications</b>   <b>Conf</b>   <b>Theor MW</b>   <b>z</b> |                            |                        |                 |                  |          |              |
| 17.1.1.1993.1                                |             | 2743.3850   915.4690   3   LLNYYNAQPLNSVQKALELTGEGEDK   Deamidated(O)@11   =1   2743.4028   3                                                             |                            |                        |                 |                  |          |              |
| <b>Peptide ID Hypotheses - 17.1.1.1993.1</b> |             |                                                                                                                                                           |                            |                        |                 |                  |          |              |
| <b>Conf</b> /                                | <b>Sc</b> / | <b>Prot H</b> /                                                                                                                                           | <b>Sequence</b> /          | <b>Modifications</b> / | <b>Theor MW</b> | <b>Theor m/z</b> | <b>z</b> | <b>ΔMass</b> |
| <1                                           | 7           |                                                                                                                                                           | LLNYYNAQPLNSVQKALELTGEGEDK |                        | 2743.4028       | 915.4749         | 3        | -0.0178      |
| <1                                           | 7           |                                                                                                                                                           | VKISGLDHPHQYYIAMDIVPVDNK   | Deamidated(O)@11       | 2743.3892       | 915.4703         | 3        | -0.0041      |
| <1                                           | 6           |                                                                                                                                                           | CADLHLKLDKDDANIAYVLASAGTR  |                        | 2743.3962       | 915.4727         | 3        | -0.0113      |
| <1                                           | 6           |                                                                                                                                                           | TFTVPIASADLIHDVAETFOOQDK   |                        | 2743.3816       | 915.4678         | 3        | 0.0033       |
| <1                                           | 6           |                                                                                                                                                           | VAAEIVQCAIINSVLPFGSSDTGEEK |                        | 2743.3699       | 915.4639         | 3        | 0.0152       |
| <b>Precursor MS Region</b>                   |             |                                                                                                                                                           |                            |                        |                 |                  |          |              |
| No Data Showing                              |             |                                                                                                                                                           |                            |                        |                 |                  |          |              |

| Fragmentation Evidence for Peptide |                  |                 |                  |                  |
|------------------------------------|------------------|-----------------|------------------|------------------|
| Residue                            | b                | b+2             | y                | y+2              |
| L                                  | 114.0913         | 57.5493         | 2744.4101        | 1372.7087        |
| L                                  | 227.1754         | 114.0913        | 2631.3261        | 1316.1667        |
| N                                  | <b>341.2183</b>  | 171.1128        | 2518.2420        | 1259.6246        |
| Y                                  | 504.2817         | 252.6445        | 2404.1991        | <b>1202.6032</b> |
| N                                  | 618.3246         | 309.6659        | 2241.1357        | 1121.0715        |
| A                                  | <b>689.3617</b>  | 345.1845        | 2127.0928        | 1064.0500        |
| Q                                  | 817.4203         | 409.2138        | 2056.0557        | <b>1028.5315</b> |
| P                                  | 914.4730         | 457.7402        | 1927.9971        | 964.5022         |
| L                                  | <b>1027.6571</b> | 514.2822        | 1830.9443        | 915.9758         |
| N                                  | 1141.6000        | <b>571.3037</b> | 1717.8603        | <b>859.4338</b>  |
| S                                  | 1228.6321        | 614.8197        | <b>1603.8174</b> | 802.4123         |
| V                                  | 1327.7005        | 664.3539        | 1516.7853        | 758.8963         |
| Q                                  | 1455.7591        | 728.3832        | 1417.7169        | 709.3621         |
| K                                  | 1583.8540        | 792.4306        | 1289.6583        | 645.3328         |
| A                                  | 1654.8911        | 827.9492        | 1161.5634        | 581.2853         |
| L                                  | 1767.9752        | 884.4912        | 1090.5263        | 545.7668         |
| E                                  | 1897.0178        | 949.0125        | 977.4422         | 489.2247         |
| L                                  | 2010.1019        | 1005.5546       | 848.3996         | <b>424.7034</b>  |
| T                                  | 2111.1495        | 1056.0784       | 735.3155         | 368.1614         |
| G                                  | 2168.1710        | 1084.5891       | 634.2679         | 317.6376         |
| E                                  | 2297.2136        | 1149.1104       | 577.2464         | 289.1268         |
| G                                  | 2354.2351        | 1177.6212       | 448.2038         | 224.6055         |
| E                                  | 2483.2776        | 1242.1425       | 391.1623         | 196.0948         |
| D                                  | 2598.3046        | 1299.6559       | 262.1397         | 131.5735         |
| K                                  | 2726.3996        | 1363.7034       | 147.1128         | 74.0600          |

| Spectrum      | Two Step Method            | Conf | Sc |
|---------------|----------------------------|------|----|
| 17.1.1.1993.1 | LLNYYNAQPLNSVQKALELTGEGEDK | 1    | 7  |

**Workflow Tasks**

- Identify Proteins
- LC...
- Spot-Based (MS only)...
- Spot-Based (MS and MS/MS)...
- View
- Analysis Log...
- Result...
- Export
- Peptide Summary...
- Protein Summary...
- MGF Peaklist(s)...

| Protein ID           |      |         |          | Spectra |        |                   |               | Summary Statistics |           |   |  |
|----------------------|------|---------|----------|---------|--------|-------------------|---------------|--------------------|-----------|---|--|
| <b>Spectrum List</b> |      |         |          |         |        |                   |               |                    |           |   |  |
| Spectrum             | Time | Prec MW | Prec m/z | Prec z  | Prot N | Best Sequence     | Modifications | Conf               | Theor MW  | z |  |
| 26.1.1.484.1         |      | 0.0000  | 475.2354 | 0       | 695    | GLSHAAASPGGASAGGR |               | 99                 | 1422.6964 | 3 |  |
| 26.1.1.486.1         |      | 0.0000  | 393.5059 | 0       |        | EMQFHCGLIK        |               | <1                 | 1177.5009 | 3 |  |
| 26.1.1.493.1         |      | 0.0000  | 376.8001 | 0       |        | KVTITLIIVK        |               | <1                 | 1126.7689 | 3 |  |

| <b>Peptide ID Hypotheses - 26.1.1.484.1</b> |    |        |                   |               |           |           |   |         |  |  |  |
|---------------------------------------------|----|--------|-------------------|---------------|-----------|-----------|---|---------|--|--|--|
| Conf                                        | Sc | Prot N | Sequence          | Modifications | Theor MW  | Theor m/z | z | ΔMass   |  |  |  |
| 99                                          | 11 | 695    | GLSHAAASPGGASAGGR |               | 1422.6964 | 475.2394  | 3 | -0.0120 |  |  |  |
| <1                                          | 9  |        | MCVGTFFPRSGK      |               | 1422.6866 | 475.2362  | 3 | -0.0023 |  |  |  |
| <1                                          | 8  |        | MRQATAVVEIASGK    |               | 1422.6847 | 475.2355  | 3 | -0.0003 |  |  |  |
| <1                                          | 7  |        | DSEGAGPLPDPNVR    |               | 1422.6740 | 475.2319  | 3 | 0.0105  |  |  |  |
| <1                                          | 7  |        | EFCRGRDLQCK       |               | 1422.6674 | 475.2297  | 3 | 0.0170  |  |  |  |

**Precursor MS Region**

No Data Showing

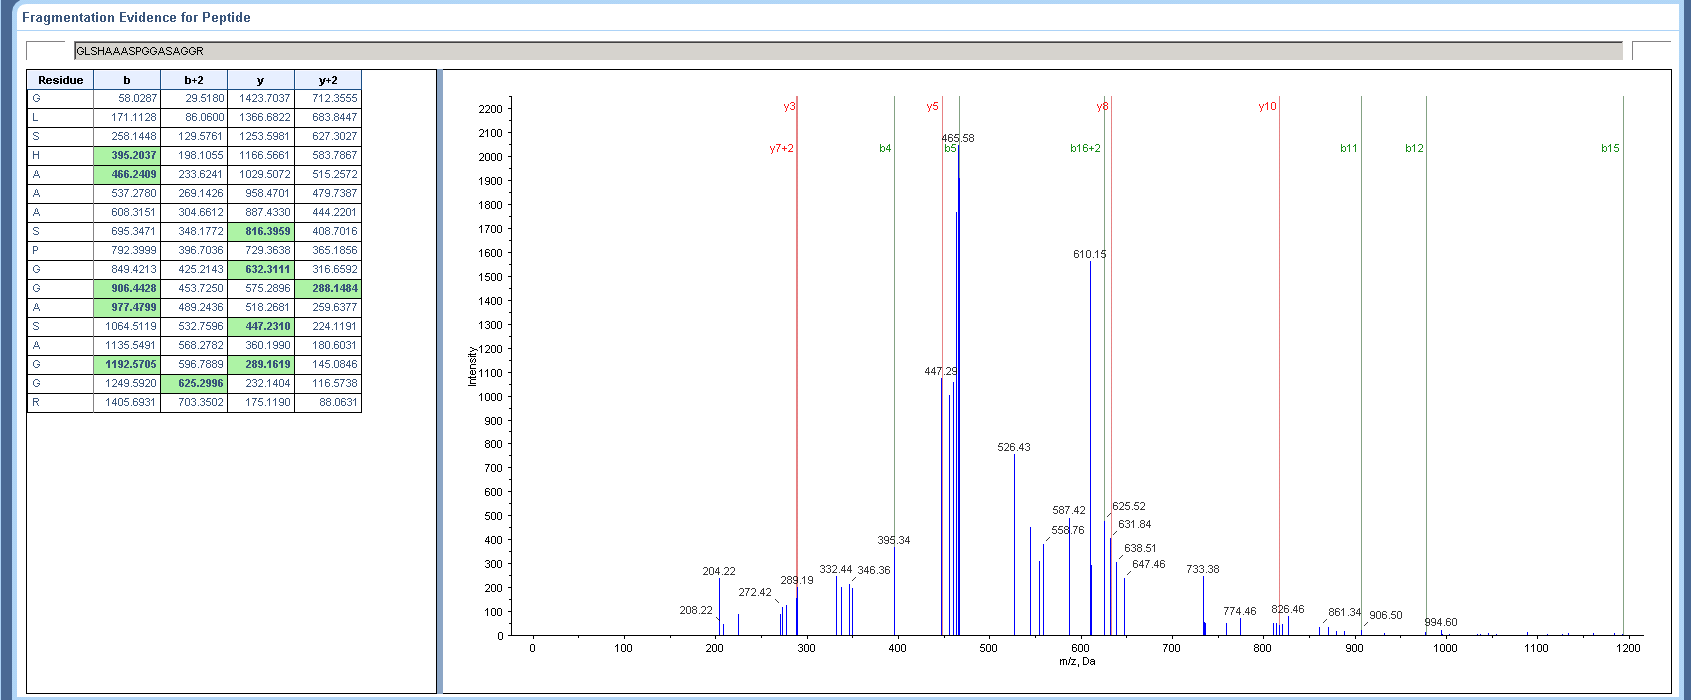

Protein ID
Spectra
Summary Statistics

**Spectrum List**

| Spectrum     | Time | Prec MW | Prec m/z | Prec z | Prot N | Best Sequence      | Modifications | Conf | Theor MW  | z |
|--------------|------|---------|----------|--------|--------|--------------------|---------------|------|-----------|---|
| 26.1.1.484.1 |      | 0.0000  | 475.2394 | 0      |        | GLSHAAASPPGGASAGGR |               | 24.1 | 1422.6964 | 3 |

**Peptide ID Hypotheses - 26.1.1.484.1**

| Conf | Sc | Prot N | Sequence           | Modifications   | Theor MW  | Theor m/z | z | ΔMass   |
|------|----|--------|--------------------|-----------------|-----------|-----------|---|---------|
| 24.1 | 11 |        | GLSHAAASPPGGASAGGR |                 | 1422.6964 | 475.2394  | 3 | -0.0120 |
| <1   | 8  |        | CVGS LCQGS SVRR    | Deamidated(O)@8 | 1422.6708 | 475.2309  | 3 | 0.0136  |
| <1   | 7  |        | EYEMELAKA SNR      |                 | 1422.6740 | 475.2319  | 3 | 0.0105  |
| <1   | 6  |        | CLDPTKAPDP PGR     |                 | 1422.6925 | 475.2381  | 3 | -0.0081 |
| <1   | 6  |        | CVSCTKTFPNA PR     |                 | 1422.6748 | 475.2322  | 3 | 0.0096  |

**Precursor MS Region**

No Data Showing

**Fragmentation Evidence for Peptide**

GLSHAAASPPGGASAGGR

| Residue | b         | b+2      | y         | y+2      |
|---------|-----------|----------|-----------|----------|
| G       | 58.0287   | 29.5180  | 1423.7037 | 712.3555 |
| L       | 171.1128  | 86.0600  | 1366.6822 | 683.8447 |
| S       | 258.1448  | 129.5761 | 1253.5981 | 627.3027 |
| H       | 395.2037  | 198.1055 | 1166.5661 | 583.7867 |
| A       | 466.2409  | 233.6241 | 1029.5072 | 515.2572 |
| A       | 537.2760  | 269.1426 | 958.4701  | 479.7387 |
| A       | 608.3151  | 304.6612 | 867.4330  | 444.2201 |
| S       | 695.3471  | 348.1772 | 816.3959  | 408.7016 |
| P       | 792.3999  | 396.7036 | 729.3638  | 365.1856 |
| G       | 849.4213  | 425.2143 | 632.3111  | 316.6592 |
| G       | 906.4428  | 453.7250 | 575.2896  | 288.1484 |
| A       | 977.4799  | 489.2436 | 518.2681  | 259.6377 |
| S       | 1064.5119 | 532.7596 | 447.2310  | 224.1191 |
| A       | 1135.5491 | 568.2782 | 360.1990  | 180.6031 |
| G       | 1192.5705 | 596.7889 | 289.1619  | 145.0846 |
| G       | 1249.5920 | 625.2986 | 232.1404  | 116.5738 |
| R       | 1405.6931 | 703.3502 | 175.1190  | 88.0631  |

| Spectrum     | Two Step Method    | Conf | Sc |
|--------------|--------------------|------|----|
| 26.1.1.484.1 | GLSHAAASPPGGASAGGR | 24.1 | 11 |

**Workflow Tasks**

- Identify Proteins
- LC...
- Spot-Based (MS only)...
- Spot-Based (MS and MS/MS)...
- View
- Analysis Log...
- Result...
- Export
- Peptide Summary...
- Protein Summary...
- MGF Peaklist(s)...

**Spectrum List**

| Spectrum      | Time | Prec MW   | Prec m/z | Prec z | Prot N | Best Sequence | Modifications | Conf | Theor MW  | z |
|---------------|------|-----------|----------|--------|--------|---------------|---------------|------|-----------|---|
| 33.1.1.7390.1 |      | 1384.7192 | 693.3669 | 2      | 791    | FNIHAPLCNTKK  |               | 99   | 1384.7285 | 2 |

**Peptide ID Hypotheses - 33.1.1.7390.1**

| Conf | Sc | Prot N | Sequence     | Modifications  | Theor MW  | Theor m/z | z | ΔMass   |
|------|----|--------|--------------|----------------|-----------|-----------|---|---------|
| 99   | 13 | 791    | FNIHAPLCNTKK |                | 1384.7285 | 693.3715  | 2 | -0.0094 |
| <1   | 9  | 864    | NFLYAMCGKPK  |                | 1384.7074 | 693.3610  | 2 | 0.0118  |
| <1   | 9  |        | FCLMGLELSTKK | Oxidation(M)@4 | 1384.7095 | 693.3620  | 2 | 0.0097  |
| <1   | 9  |        | FLDHALGALNRS |                | 1384.7252 | 693.3699  | 2 | -0.0060 |

**Precursor MS Region**

No Data Showing

**Fragmentation Evidence for Peptide**

FNIHAPLCNTKK

| Residue | b         | b+2      | y         | y+2      |
|---------|-----------|----------|-----------|----------|
| F       | 148.0757  | 74.5415  | 1385.7358 | 693.3715 |
| N       | 262.1188  | 131.5629 | 1238.6674 | 619.8373 |
| I       | 375.2027  | 188.1050 | 1124.6246 | 562.8159 |
| H       | 512.2616  | 256.6344 | 1011.5404 | 506.2738 |
| A       | 583.2987  | 292.1530 | 874.4815  | 437.7444 |
| P       | 680.3515  | 340.6794 | 803.4444  | 402.2258 |
| L       | 793.4355  | 397.2214 | 706.3916  | 353.6994 |
| C       | 896.4447  | 448.7260 | 693.3876  | 297.1574 |
| N       | 1010.4876 | 505.7475 | 490.2984  | 245.6528 |
| T       | 1111.5363 | 556.2713 | 376.2564  | 188.6314 |
| K       | 1239.6303 | 620.3188 | 275.2078  | 138.1075 |
| K       | 1367.7253 | 684.3663 | 147.1128  | 74.0600  |

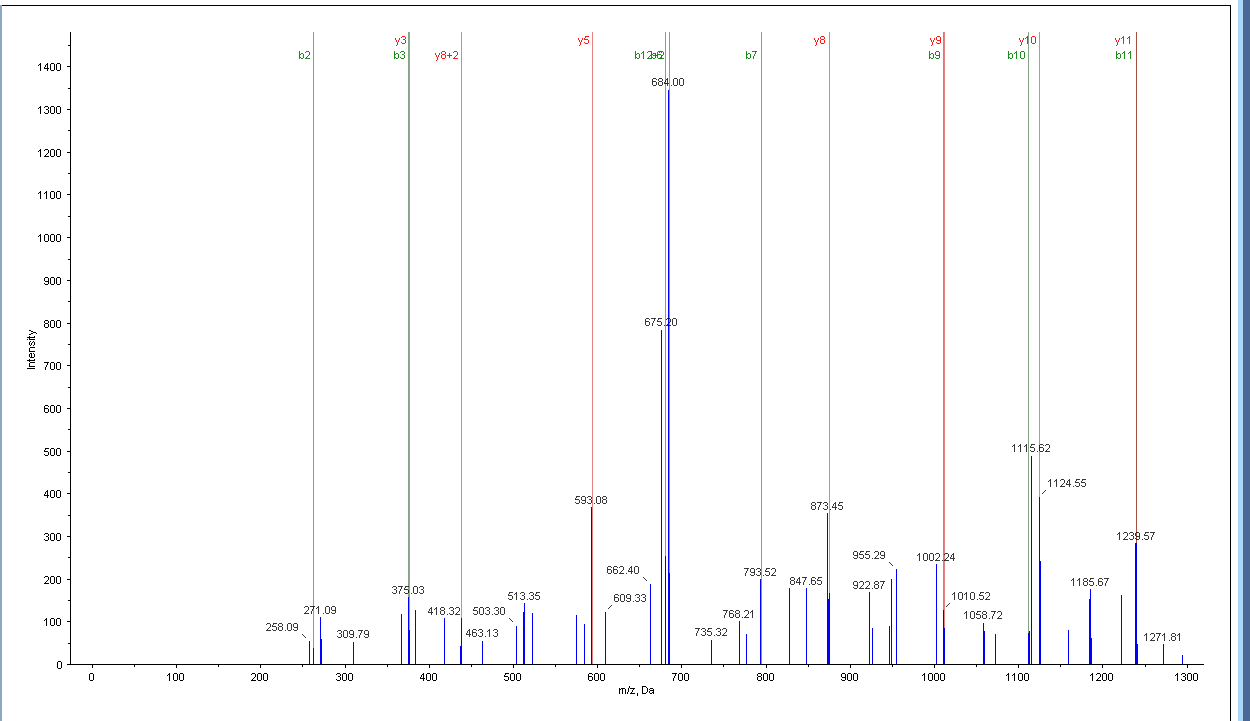

**Workflow Tasks**

- Identify Proteins
- LC...
- Spot-Based (MS only)...
- Spot-Based (MS and MS/MS)...
- View
- Analysis Log...
- Result...
- Export
- Peptide Summary...
- Protein Summary...
- MGF Peaklist(s)...

**Spectrum List**

| Spectrum      | Time | Prec MW   | Prec m/z | Prec z | Prot H | Best Sequence | Modifications | Conf | Theor MW  | z |
|---------------|------|-----------|----------|--------|--------|---------------|---------------|------|-----------|---|
| 33.1.1.7390.1 |      | 1384.7192 | 693.3669 | 2      | 894    | NFLYAWCGKRK   |               | 61.9 | 1384.7074 | 2 |

**Peptide ID Hypotheses - 33.1.1.7390.1**

| Conf | Sc | Prot H | Sequence      | Modifications        | Theor MW  | Theor m/z | z | ΔMass   |
|------|----|--------|---------------|----------------------|-----------|-----------|---|---------|
| 61.9 | 9  | 894    | NFLYAWCGKRK   |                      | 1384.7074 | 693.3610  | 2 | -0.0117 |
| 19.9 | 8  |        | QAALLEEQARLK  |                      | 1384.7311 | 693.3728  | 2 | -0.0119 |
| 9.4  | 8  |        | ESIAEHKPHIDK  | Glu->pyro-Glu@N-term | 1384.7100 | 693.3622  | 2 | -0.0092 |
| 1.6  | 7  |        | QRVELQEQVEK   |                      | 1384.7311 | 693.3728  | 2 | -0.0119 |
| 1.2  | 7  |        | MHDELKSSVKTGK |                      | 1384.7311 | 693.3728  | 2 | -0.0119 |

**Precursor MS Region**

No Data Showing

**Fragmentation Evidence for Peptide**

NFLYAWCGKRK

| Residue | b         | b+2      | y         | y+2      |
|---------|-----------|----------|-----------|----------|
| N       | 115.0502  | 58.0287  | 1385.7147 | 693.3610 |
| F       | 262.1186  | 131.5629 | 1271.6718 | 636.3395 |
| L       | 375.2027  | 188.1050 | 1124.6033 | 562.8053 |
| Y       | 538.2660  | 269.6366 | 1011.5193 | 506.2633 |
| A       | 609.3031  | 305.1552 | 848.4560  | 424.7316 |
| W       | 795.3824  | 398.1949 | 777.4188  | 389.2131 |
| C       | 898.3916  | 449.6994 | 591.3395  | 296.1734 |
| G       | 955.4131  | 478.2102 | 488.3303  | 244.6888 |
| K       | 1083.5090 | 542.2577 | 431.3089  | 216.1581 |
| R       | 1239.6092 | 620.3082 | 303.2139  | 152.1106 |
| K       | 1367.7041 | 684.3557 | 147.1128  | 74.0600  |

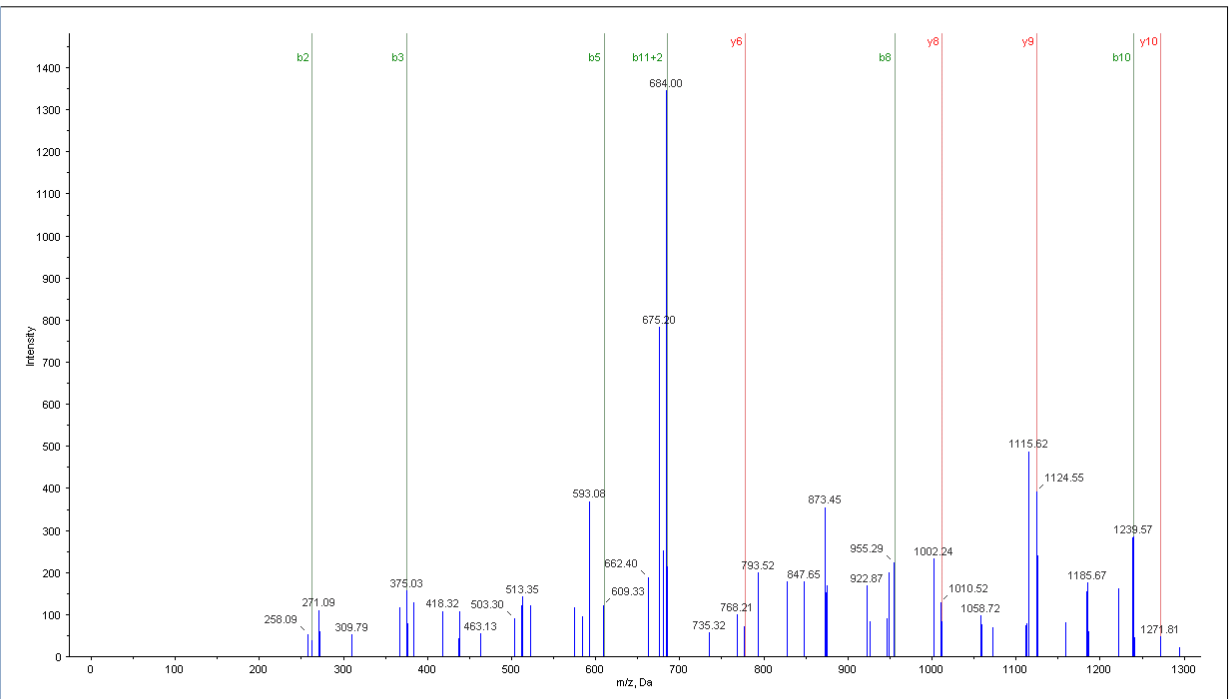

| Spectrum      | Two Step Method | Conf Sc |
|---------------|-----------------|---------|
| 33.1.1.7390.1 | NFLYAWCGKRK     | 61.9 9  |

**Workflow Tasks**

- Identify Proteins
- LC...
- Spot-Based (MS only)...
- Spot-Based (MS and MS/MS)...
- View
- Analysis Log...
- Result...
- Export
- Peptide Summary...
- Protein Summary...
- MGF Peaklist(s)...

**Spectrum List**

| Spectrum      | Time | Prec MW  | Prec m/z | Prec z | Prot N | Best Sequence | Modifications | Conf | Theor MW | z |
|---------------|------|----------|----------|--------|--------|---------------|---------------|------|----------|---|
| 35.1.1.3120.1 |      | 993.4904 | 497.7524 | 2      | 386    | EAMSSKYSR     |               | 94.3 | 993.4913 | 2 |

**Peptide ID Hypotheses - 35.1.1.3120.1**

| Conf | Sc | Prot N | Sequence   | Modifications   | Theor MW | Theor m/z | z | ΔMass   |
|------|----|--------|------------|-----------------|----------|-----------|---|---------|
| 94.3 | 9  | 386    | EAMSSKYSR  |                 | 993.4913 | 497.7529  | 2 | -0.0010 |
| <1   | 7  | 6      | SISMSVAGSR |                 | 993.4913 | 497.7529  | 2 | -0.0010 |
| <1   | 7  |        | ISNSKVSQSR | Deamidated(N)@3 | 993.4913 | 497.7529  | 2 | -0.0010 |
| <1   | 6  |        | FLASQSDR   |                 | 993.4880 | 497.7513  | 2 | 0.0024  |
| <1   | 6  |        | FNDGTTGMR  |                 | 993.4954 | 497.7548  | 2 | -0.0050 |

**Precursor MS Region**

No Data Showing

**Fragmentation Evidence for Peptide**

EAMSSKYSR

| Residue | b               | b+2             | y               | y+2             |
|---------|-----------------|-----------------|-----------------|-----------------|
| E       | 130.0499        | 65.5286         | 994.4986        | 497.7529        |
| A       | <b>201.0870</b> | 101.0471        | 865.4560        | 433.2316        |
| M       | <b>332.1275</b> | 166.5674        | <b>794.4189</b> | 397.7131        |
| S       | 419.1595        | 210.0834        | <b>663.3784</b> | <b>332.1928</b> |
| S       | 506.1915        | 253.5994        | 576.3464        | 288.6768        |
| K       | <b>634.2065</b> | 317.6469        | <b>409.3144</b> | 245.1608        |
| V       | <b>733.3549</b> | 367.1811        | 361.2194        | 181.1133        |
| R       | 820.3869        | 410.6971        | <b>262.1510</b> | 131.5791        |
| R       | 976.4880        | <b>488.7477</b> | 175.1190        | 88.0631         |

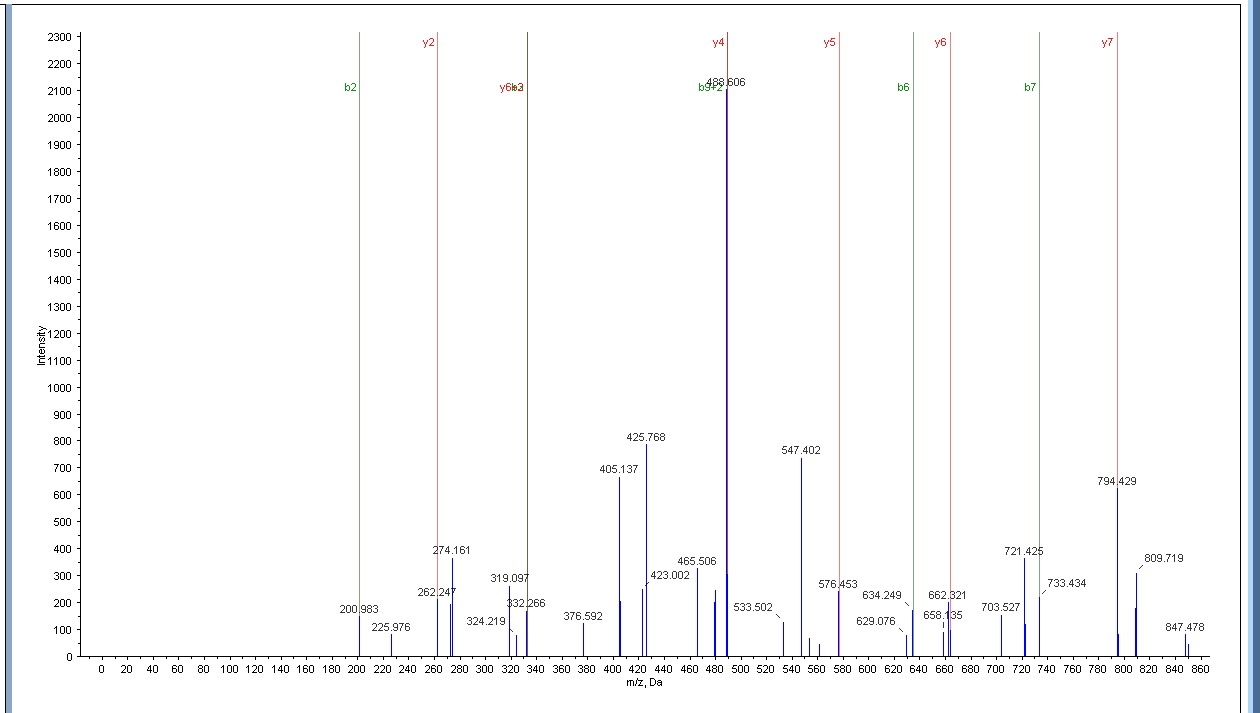

**Workflow Tasks**

- Identify Proteins
- LC...
- Spot-Based (MS only)...
- Spot-Based (MS and MS/MS)...
- View
- Analysis Log...
- Result...
- Export
- Peptide Summary...
- Protein Summary...
- MGF Peaklist(s)...

**Spectrum List**

| Spectrum      | Time | Prec MW  | Prec m/z | Prec z | Prot N | Best Sequence | Modifications | Conf | Theor MW | z |
|---------------|------|----------|----------|--------|--------|---------------|---------------|------|----------|---|
| 35.1.1.3120.1 |      | 993.4904 | 497.7524 | 2      | 6,1861 | SISMSVAGSR    |               | 45   | 993.4913 | 2 |

**Peptide ID Hypotheses - 35.1.1.3120.1**

| Conf | Sc | Prot N | Sequence   | Modifications  | Theor MW | Theor m/z | z | ΔMass   |
|------|----|--------|------------|----------------|----------|-----------|---|---------|
| 45   | 7  | 6,1861 | SISMSVAGSR |                | 993.4913 | 497.7529  | 2 | -0.0010 |
| 13.2 | 6  |        | FLASQSADR  |                | 993.4880 | 497.7513  | 2 | 0.0024  |
| 13.2 | 6  |        | SLNMTSVSR  |                | 993.4913 | 497.7529  | 2 | -0.0010 |
| <1   | 6  |        | SLQSVHADK  | Oxidation(M)@6 | 993.4801 | 497.7473  | 2 | 0.0102  |
| <1   | 5  |        | LSPPHGSSR  |                | 993.4992 | 497.7568  | 2 | -0.0089 |

**Precursor MS Region**

No Data Showing

**Fragmentation Evidence for Peptide**

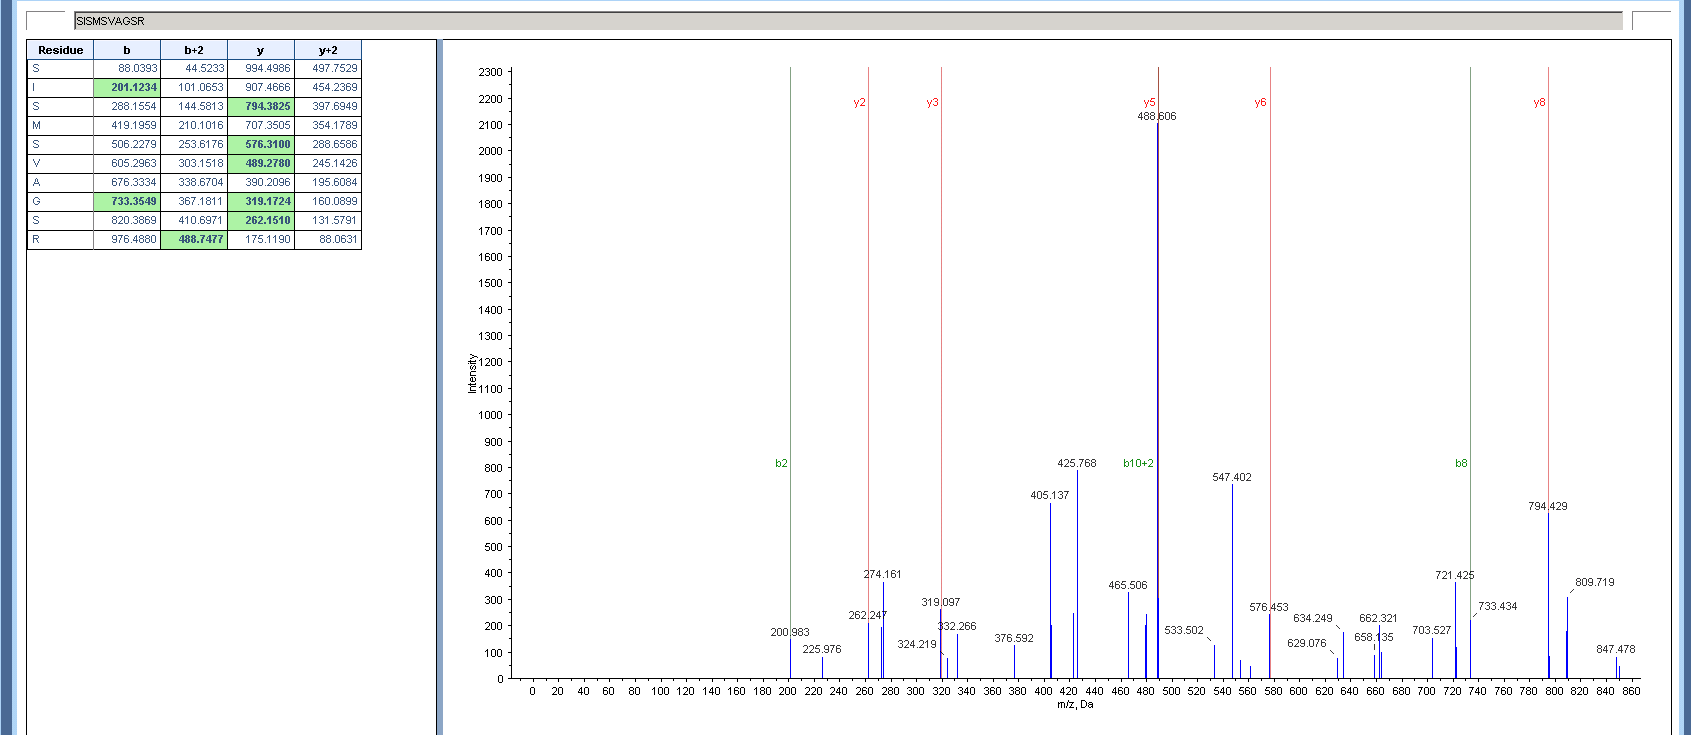

| Spectrum      | Two Step Method | Conf Sc |
|---------------|-----------------|---------|
| 35.1.1.3120.1 | SISMSVAGSR      | 44.9 7  |



**Workflow Tasks**

- Identify Proteins
- LC...
- Spot-Based (MS only)...
- Spot-Based (MS and MS/MS)...
- View
- Analysis Log...
- Result...
- Export
- Peptide Summary...
- Protein Summary...
- MGF Peaklist(s)...

**Spectrum List**

| Spectrum /   | Time | Prec MW | Prec m/z | Prec z | Prot N | Best Sequence | Modifications | Conf | Theor MW | z |
|--------------|------|---------|----------|--------|--------|---------------|---------------|------|----------|---|
| 42.1.1.365.1 |      | 0.0000  | 480.7436 | 0      | 883    | MNVGGAGVAGK   |               | 97.5 | 959.4858 | 2 |

**Peptide ID Hypotheses - 42.1.1.365.1**

| Conf | Sc | Prot N | Sequence    | Modifications   | Theor MW | Theor m/z | z | ΔMass   |
|------|----|--------|-------------|-----------------|----------|-----------|---|---------|
| 97.5 | 9  | 883    | MNVGGAGVAGK |                 | 959.4858 | 480.7502  | 2 | -0.0132 |
| <1   | 7  |        | ATVEGGQAR   | Deamidated(G)@6 | 959.4672 | 480.7409  | 2 | 0.0054  |
| <1   | 6  |        | AELSGGAEVK  |                 | 959.4924 | 480.7535  | 2 | -0.0197 |
| <1   | 6  |        | GHGQCTPKGK  |                 | 959.4858 | 480.7502  | 2 | -0.0132 |
| <1   | 6  |        | GTGCTRANQV  |                 | 959.4785 | 480.7465  | 2 | -0.0058 |
| <1   | 6  |        | ...         |                 | 959.4760 | 480.7452  | 2 | -0.0032 |

**Precursor MS Region**

No Data Showing

**Fragmentation Evidence for Peptide**

MNVGGAGVAGK

| Residue | b        | b+2      | y        | y+2      |
|---------|----------|----------|----------|----------|
| M       | 132.0478 | 66.5275  | 960.4931 | 480.7502 |
| N       | 246.0907 | 123.5490 | 829.4526 | 415.2300 |
| V       | 346.1591 | 173.0832 | 715.4097 | 358.2085 |
| G       | 402.1806 | 201.5939 | 616.3413 | 308.6743 |
| G       | 459.2020 | 230.1047 | 559.3198 | 280.1636 |
| A       | 530.2391 | 265.6232 | 502.2984 | 251.6528 |
| G       | 587.2606 | 294.1339 | 431.2813 | 216.1343 |
| V       | 686.3290 | 343.6681 | 374.2390 | 187.6235 |
| A       | 757.3661 | 379.1867 | 275.1714 | 138.0893 |
| G       | 814.3876 | 407.6974 | 204.1343 | 102.5708 |
| K       | 942.4826 | 471.7449 | 147.1128 | 74.0600  |

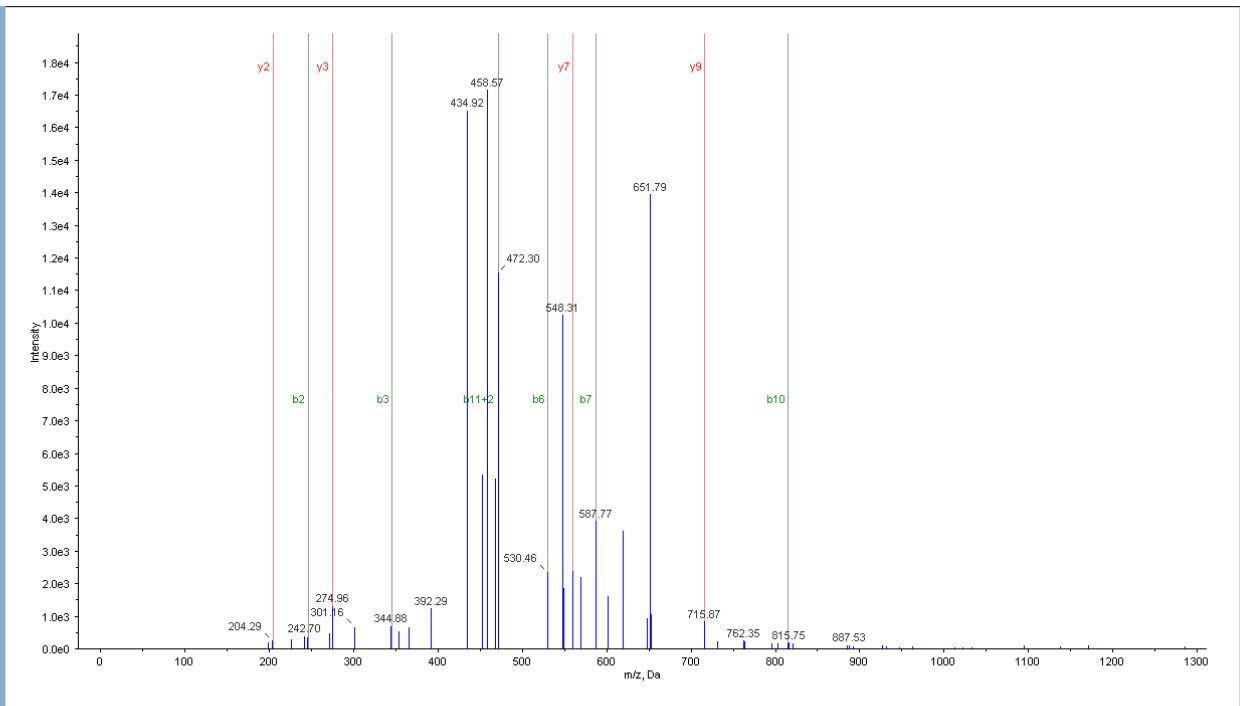

| Spectrum     | One Step Method | Conf Sc |
|--------------|-----------------|---------|
| 42.1.1.365.1 | MNVGGAGVAGK     | 97.5 9  |

File Configure Window Help

**Workflow Tasks**

- Identify Proteins
- LC...
- Spot-Based (MS only)...
- Spot-Based (MS and MS/MS)...
- View
- Analysis Log...
- Result...
- Export
- Peptide Summary...
- Protein Summary...
- MGF Peaklist(s)...

**Spectrum List**

| Spectrum /   | Time | Pre MW | Pre m/z  | Prec z | Prot # | Best Sequence | Modifications | Conf | Theor MW | z |
|--------------|------|--------|----------|--------|--------|---------------|---------------|------|----------|---|
| 42.1.1.365.1 |      | 0.0000 | 480.7436 | 0      | 1398   | MNVGGAGVAGK   |               | 81.8 | 959.4858 | 2 |

**Peptide ID Hypotheses - 42.1.1.365.1**

| Conf | Sc | Prot # | Sequence    | Modifications        | Theor MW | Theor m/z | z | ΔMass   |
|------|----|--------|-------------|----------------------|----------|-----------|---|---------|
| 81.8 | 9  | 1398   | MNVGGAGVAGK |                      | 959.4858 | 480.7502  | 2 | -0.0132 |
| <1   | 4  | 353    | QNVETE LK   | Gln->pyro-Glu@N-term | 959.4634 | 480.7390  | 2 | 0.0092  |
| <1   | 6  |        | ENTQPKVAG   |                      | 959.4746 | 480.7446  | 2 | -0.0020 |
| <1   | 6  |        | MNRTWPR     |                      | 959.4760 | 480.7452  | 2 | -0.0033 |
| <1   | 5  |        | EDDQAGVYK   |                      | 959.4560 | 480.7353  | 2 | 0.0166  |
| <1   | 5  |        | EDNIDAVYK   |                      | 959.4560 | 480.7353  | 2 | 0.0166  |

**Precursor MS Region**

No Data Showing

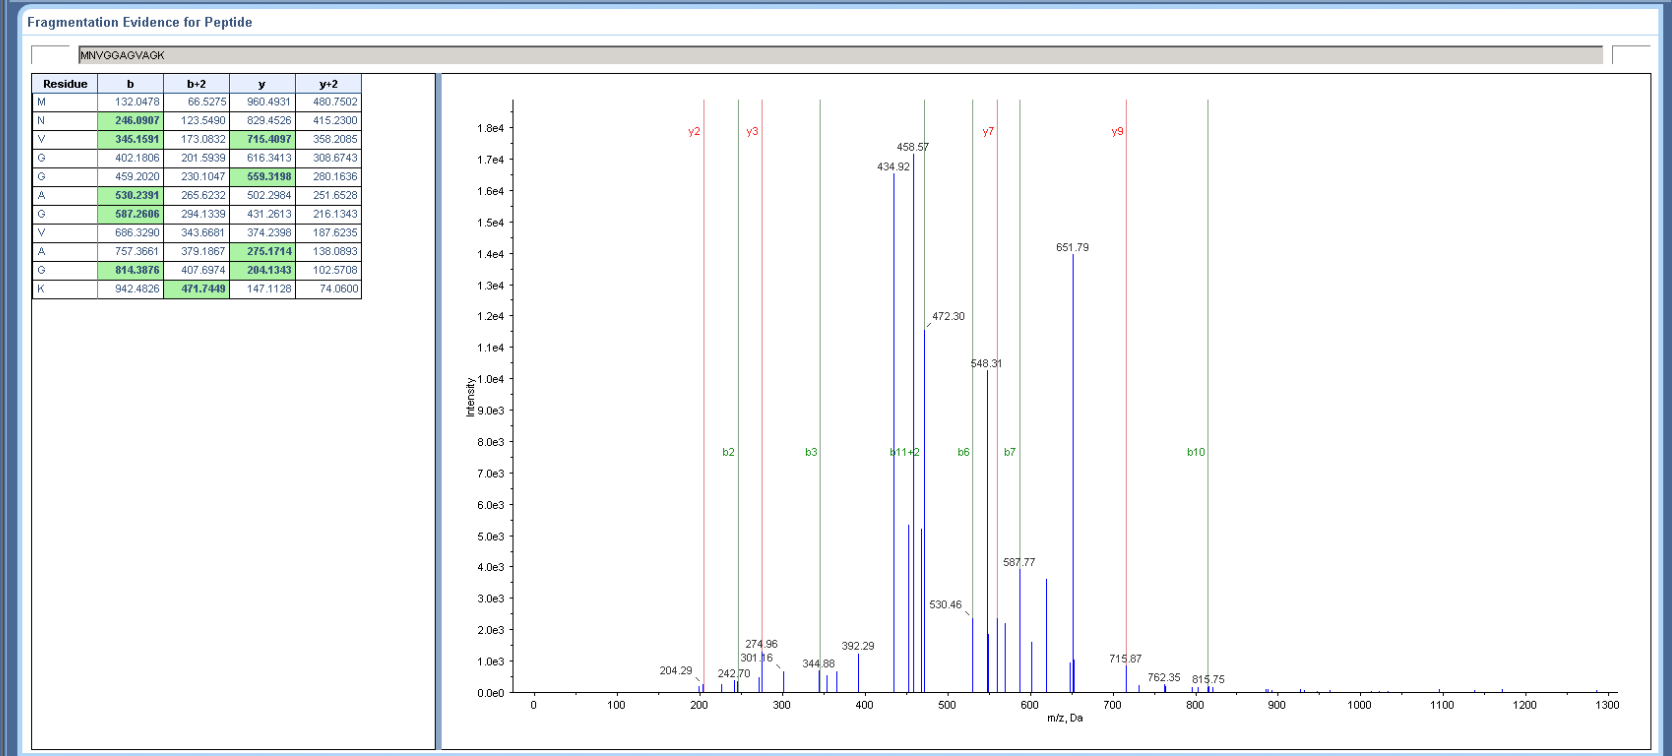

| Spectrum     | Two Step Method | Conf Sc |
|--------------|-----------------|---------|
| 42.1.1.365.1 | MNVGGAGVAGK     | 81.7 9  |
